# Supplementary material for: Electrochemically driven, cobalt–carbon bond-mediated direct intramolecular cyclic and acyclic perfluoroalkylation of (hetero)arenes using X(CF2)4X
Source: Royal Society of Chemistry journal article supplement (doi:10.1039/d0ra05295g), 2020-01-01
Supplement: d0ra05295g1.pdf [file d0ra05295g1.pdf]

## Supporting Information

# Electrochemically Driven, Cobalt–Carbon Bond-Mediated Direct Intramolecular Cyclic and Acyclic Perfluoroalkylation of (Hetero)Arenes using $X(\text{CF}_2)_4X$

Luxia Cui,<sup>a</sup> Toshikazu Ono,<sup>\*a, b</sup> Md. Jakir Hossain<sup>†a</sup> and Yoshio Hisaeda<sup>\*a, b</sup>

<sup>a</sup> Department of Chemistry and Biochemistry, Graduate School of Engineering, Kyushu University, 744 Motooka, Nishi-ku, Fukuoka 819-0395, Japan. E-mail: [tono@mail.cstm.kyushu-u.ac.jp](mailto:tono@mail.cstm.kyushu-u.ac.jp); [yhisatcm@mail.cstm.kyushu-u.ac.jp](mailto:yhisatcm@mail.cstm.kyushu-u.ac.jp)

<sup>b</sup> Center for Molecular Systems (CMS), Kyushu University, 744 Motooka, Nishi-ku, Fukuoka 819-0395, Japan.

<sup>†</sup> Current address: Department of Chemistry, Begum Rokeya University, Park Mor, Modern, Rangpur-5404, Bangladesh.

## Experimental Section

## Materials and measurements.

All chemical reagents and solvents used in this study were obtained from commercial sources and used as received unless otherwise stated. The vitamin B<sub>12</sub> model complex, heptamethyl cobyrinate perchlorate [Cob(II)7C<sub>1</sub>ester]ClO<sub>4</sub> (**C1**), was prepared according to the literature.<sup>1</sup> <sup>1</sup>H NMR and <sup>13</sup>C NMR spectra were recorded by using a Bruker Avance 500 NMR spectrometer. The chemical shifts (in ppm) of <sup>1</sup>H NMR were referenced relative to tetramethylsilane (CH<sub>3</sub>)<sub>4</sub>Si, with the residual solvent peak of chloroform-*d* (CDCl<sub>3</sub>) at 7.26 ppm as an internal standard and the chemical shifts (in ppm) of <sup>13</sup>C NMR were referenced relative to the residual solvent peak of CDCl<sub>3</sub> at 77.2 ppm. <sup>19</sup>F NMR spectra were recorded by using a JEOL JNM-ECZ400 NMR spectrometer at the Centre of Advanced Instrumental Analysis in Kyushu University and a Bruker Avance 300 NMR spectrometer. The chemical shifts (in ppm) of <sup>19</sup>F NMR were referenced relative to hexafluorobenzene (C<sub>6</sub>F<sub>6</sub>) at -162.90 ppm in CDCl<sub>3</sub>. The coupling constants, *J* are reported in Hertz (Hz). Multiplicity is abbreviated as follows: s = singlet, d = doublet, t = triplet, q = quartet, m = multiplet. Cyclic voltammetry (CV) was carried out using a BAS ALS-630C electrochemical analyzer at a scan rate of 100 mV s<sup>-1</sup>. The cell was equipped with three electrodes: an Ag/AgCl (3 M NaCl aq.) reference electrode (RE), a glassy carbon working electrode (WE), and a platinum wire counter electrode (CE). The experiments were performed in methanol (CH<sub>3</sub>OH) under N<sub>2</sub> atmosphere with tetrabutylammonium perchlorate (TBAP, *n*-Bu<sub>4</sub>NClO<sub>4</sub>, 0.1 M) as the electrolyte. The concentrations of the analytes were 1 × 10<sup>-3</sup> M. The electrolysis was carried out using an ECstat-301WL electrochemical analyzer from EC FRONTIER CO., Ltd. The gas chromatography-mass spectra (GC-MS) were obtained using a Shimadzu GCMS-QP2010SE equipped with an Agilent J&W DB-1 column (length: 30 m; ID: 0.25 mm; film: 0.25 μm) and helium as the carrier gas. For the measurement, the injector and detector temperatures were 250 °C, the oven temperature was initially held at 100 °C for 2 min, then increased to 240 °C at the rate of 10 °C /min. A 200 W tungsten lamp with a 420 nm cut-off filter (Sigma Koki, 42L) and a heat cut-off filter (Sigma Koki, 30H) purchased from TechnoSigma were used as the visible-light irradiation experiment. The ESR spectra were obtained using a Bruker EMX-Plus X-band spectrometer at room temperature. Gel permeation chromatography (GPC) was carried out by a Japan Analytical Industry Co., Ltd., LC-908 apparatus equipped with a UV-3702 attachment using three connected columns (JAIGEL-1H, 2H, and 2.5H) with a chloroform (CHCl<sub>3</sub>) eluent and a Japan Analytical Industry Co. Ltd., LC-9201 apparatus equipped with a UV-3702 attachment using two connected columns (JAIGEL-GS310) with a CH<sub>3</sub>OH eluent. The high-resolution mass spectra (HRMS, EI-MS) were performed with a JEOL JMS-700 instrument. All the products were isolated by silica-gel column chromatography (Kanto Chemicals, 60N) and GPC; and then isolated products were identified by GC-MS, HRMS (EI-MS), <sup>1</sup>H, <sup>19</sup>F and <sup>13</sup>C NMR.

## X-ray crystal structure analysis.

The crystals were mounted on a loop. Diffraction data of crystal samples were collected at 93 K or 123 K using a Rigaku XtaLABmini CCD diffractometer equipped with graphite-monochromated Mo K $\alpha$  radiation ( $\lambda$  = 0.71073 Å). Collected data were integrated, corrected, and scaled using CrysAlis(Pro).<sup>2</sup> The structures were refined using SHELXT (Sheldrick, 2015)<sup>3</sup> Intrinsic phasing and SHELXL (Sheldrick, 2015).<sup>4</sup> All nonhydrogen atoms were refined anisotropically. Hydrogen atoms were located at calculated positions and included in the structure factor calculation but were not refined. The program Olex 2 was used as a graphical interface.<sup>5</sup> Crystallographic data have been deposited with the Cambridge Crystallographic Data Centre. The data can be obtained free of charge on application to CCDC, 12 Union Road, Cambridge CB21EZ, UK (fax: (+44) 1223-336-033; email: [deposit@ccdc.cam.ac.uk](mailto:deposit@ccdc.cam.ac.uk)). The CCDC numbers for crystal structures of **1a**, **3a**, **5a**, and **7a** are 2004379, 2004380, 2004381, and 2004382, respectively.

**General procedure for catalytic reaction under electrochemical conditions.**<sup>6</sup>

Controlled-potential electrolysis were carried out in dry CH<sub>3</sub>OH at –0.8 V vs. Ag/AgCl under N<sub>2</sub> atmosphere in an undivided electrolysis cell. The electrolysis cell was equipped with three electrodes; i.e., a carbon felt cathode, a sacrificial Zn plate anode, and an Ag/AgCl (3.0 M NaCl aq.) as the reference electrode. For a typical reaction, a 5 mL methanol solution of **C1** ( $5.0 \times 10^{-4}$  M) (1 mol%), 1,4-dimethoxybenzene (**1**) ( $5.0 \times 10^{-2}$  M), TBAP (*n*-Bu<sub>4</sub>NClO<sub>4</sub>) (0.1 M) and decafluorobiphenyl (C<sub>12</sub>F<sub>10</sub>) as the internal standard was degassed by N<sub>2</sub> gas and stirred at room temperature with visible-light irradiation ( $\geq 420$  nm). N<sub>2</sub> gas was passed over the solution during the measurement to remove O<sub>2</sub> from the reaction system. Octafluoro-1,4-diiodobutane (1,4-C<sub>4</sub>F<sub>8</sub>I<sub>2</sub>, 6 eq. of substrate) as the fluoroalkylating reagent dissolved in CH<sub>3</sub>OH was taken into a 5 mL diameter syringe pump and then it was connected to a reaction cell. A constant flow (0.5 eq. of substrate per 1 h) of this solution was added into the reaction mixture for 12 h. After the catalytic reaction, the reaction mixture was passed through a short silica-gel column to remove the catalyst and TBAP, and then analyzed by GC-MS. All the products were purified by silica-gel column chromatography and GPC. The authentic samples were characterized by NMR and mass spectrometry.

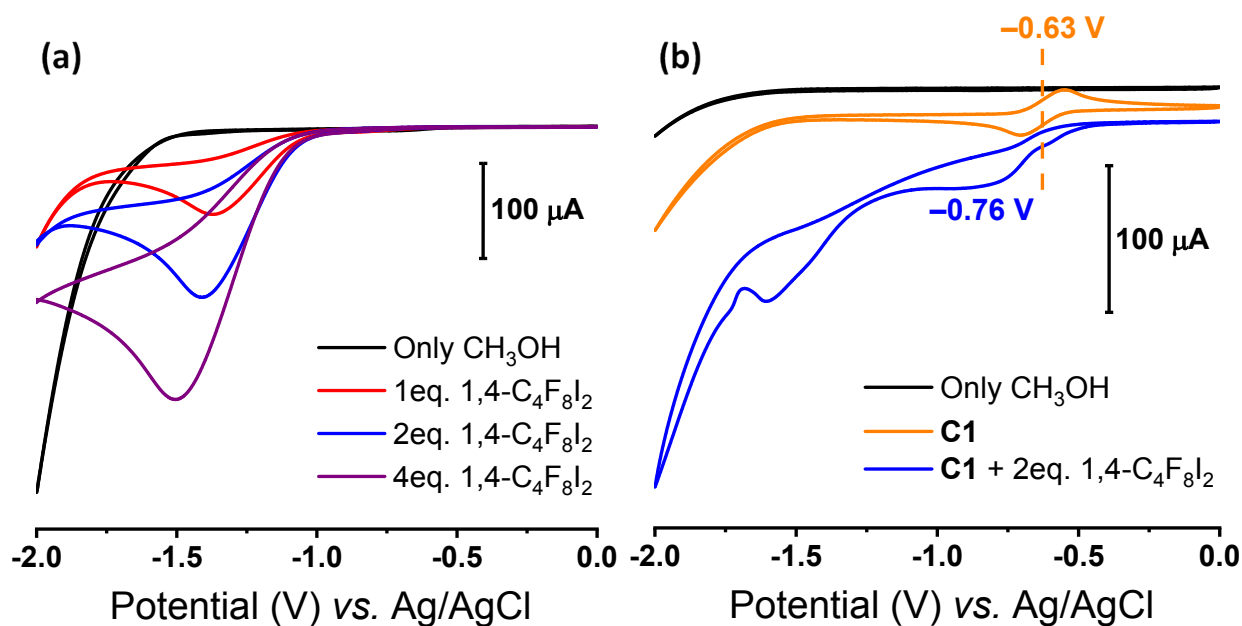

**Figure S1.** (a) CV of octafluoro-1,4-diiodobutane (1,4-C<sub>4</sub>F<sub>8</sub>I<sub>2</sub>) and (b) [Cob(II)7C<sub>1</sub>ester]ClO<sub>4</sub> (**C1**) as the catalyst (1 mM) with/without 1,4-C<sub>4</sub>F<sub>8</sub>I<sub>2</sub> (2 mM) in CH<sub>3</sub>OH containing of 100 mM tetrabutylammonium perchlorate (TBAP, *n*-Bu<sub>4</sub>NClO<sub>4</sub>) under N<sub>2</sub>. Reference electrode (RE): Ag/AgCl; Working electrode (WE): glassy carbon; Counter electrode (CE): Pt wire; Scan rate: 100 mV s<sup>-1</sup>.

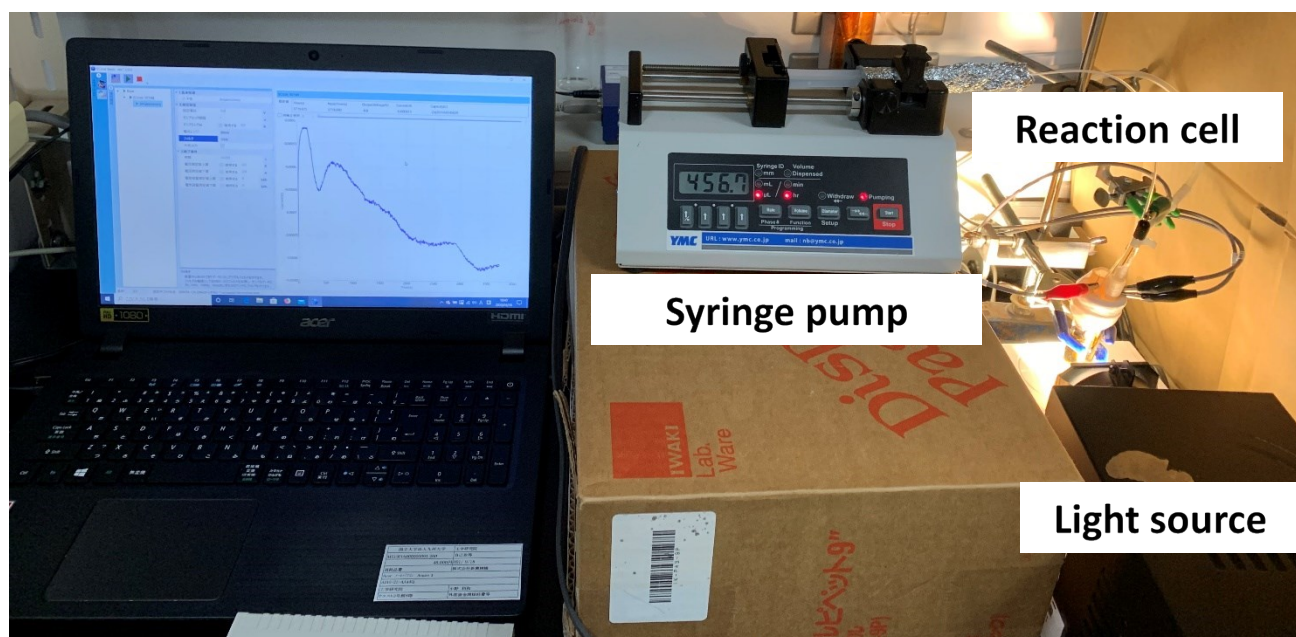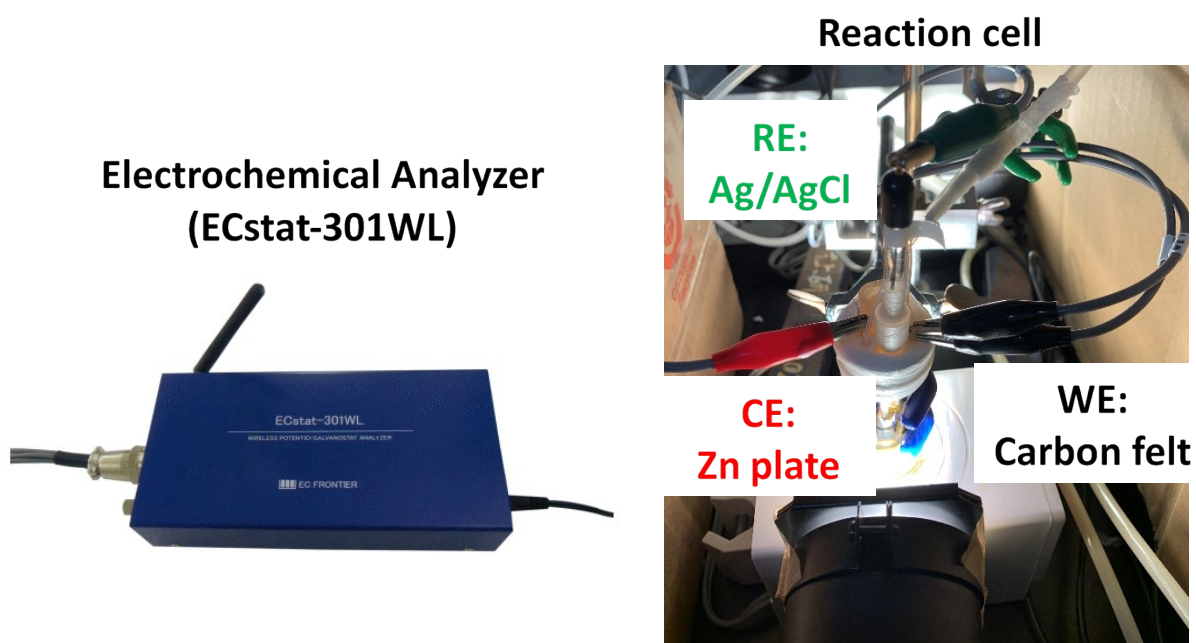

**Figure S2.** Experimental setup image of controlled-potential electrolysis.

**Table S1.** Optimization of the reaction conditions for the fluoroalkylation of **1** with 1,4-C<sub>4</sub>F<sub>8</sub>I<sub>2</sub><sup>o</sup>

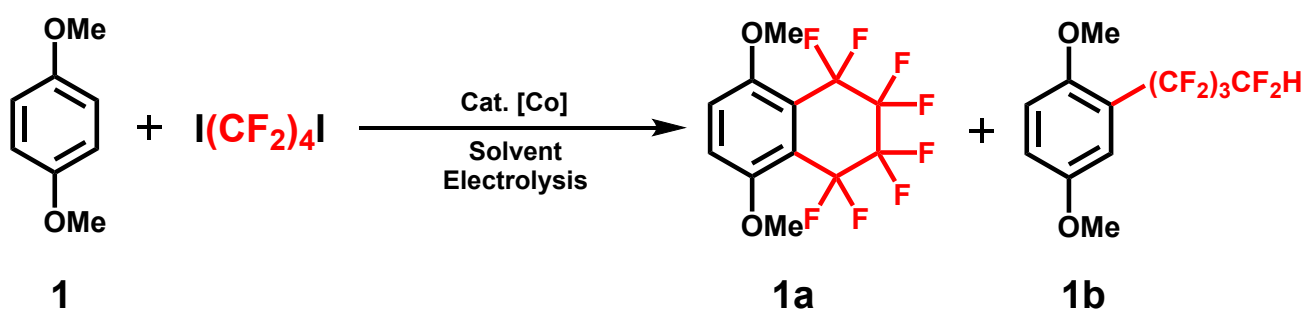

| Entry              | Potential (V) vs. Ag/AgCl | Solvent <sup>b</sup> | 1,4-C <sub>4</sub> F <sub>8</sub> I <sub>2</sub> | Reaction time (h) | Conversion (%) <sup>c</sup> | 1a Yield (%) <sup>c</sup> | 1b Yield (%) <sup>c</sup> |
|--------------------|---------------------------|----------------------|--------------------------------------------------|-------------------|-----------------------------|---------------------------|---------------------------|
| S1                 | −0.8 V                    | CH <sub>3</sub> CN   | 0.5 eq. of substrate per 1 h                     | 6 h               | >99                         | <i>trace</i>              | 1                         |
| S2                 | −0.8 V                    | DMSO                 | 0.5 eq. of substrate per 1 h                     | 6 h               | 18                          | <i>trace</i>              | 1                         |
| S3                 | −0.8 V                    | CH <sub>3</sub> OH   | 0.5 eq. of substrate per 1 h                     | 6 h               | 58                          | 5                         | 10                        |
| S4 <sup>d</sup>    | −0.8 V                    | CH <sub>3</sub> OH   | 0.5 eq. of substrate per 1 h                     | 6 h               | 1                           | 0                         | <i>trace</i>              |
| S5 <sup>e</sup>    | −0.8 V                    | CH <sub>3</sub> OH   | 0.5 eq. of substrate per 1 h                     | 6 h               | 63                          | <i>trace</i>              | 3                         |
| S6 <sup>f</sup>    | −0.8 V                    | CH <sub>3</sub> OH   | 0.5 eq. of substrate per 1 h                     | 6 h               | 52                          | <i>trace</i>              | 2                         |
| S7 <sup>f</sup>    | −0.8 V                    | CH <sub>3</sub> CN   | 0.5 eq. of substrate per 1 h                     | 6 h               | 76                          | <i>trace</i>              | <i>trace</i>              |
| S8 <sup>e, f</sup> | −0.8 V                    | CH <sub>3</sub> CN   | 0.5 eq. of substrate per 1 h                     | 6 h               | 0                           | 0                         | 0                         |
| S9                 | −0.8 V                    | CH <sub>3</sub> OH   | 1.0 eq. of substrate per 1 h                     | 9 h               | >99                         | 8                         | 12                        |
| S10 <sup>g</sup>   | −0.8 V                    | CH <sub>3</sub> OH   | 1.0 eq. of substrate per 1 h                     | 9 h               | >99                         | 30                        | 23                        |

<sup>a</sup> Reaction conditions: [**C1**] =  $5.0 \times 10^{-4}$  M; [1,4-dimethoxybenzene (**1**)] =  $5.0 \times 10^{-2}$  M; [*n*-Bu<sub>4</sub>NClO<sub>4</sub>] = 0.1 M; Decafluorobiphenyl (C<sub>12</sub>F<sub>10</sub>) as the internal standard; WE: carbon felt; CE: Zn plate; RE: Ag/AgCl (3.0 M NaCl aq.). <sup>b</sup> Abbreviations: CH<sub>3</sub>CN, acetonitrile; DMSO, dimethyl sulfoxide; CH<sub>3</sub>OH, methanol. <sup>c</sup> The conversions and yields are based on the initial concentration of 1,4-dimethoxybenzene (**1**) and were determined by gas chromatography-mass spectrometry (GC-MS). <sup>d</sup> In the absence of **C1**. <sup>e</sup> WE: Pt mesh. <sup>f</sup> **C2** as the catalyst. <sup>g</sup> With visible light ( $\geq 420$ nm).

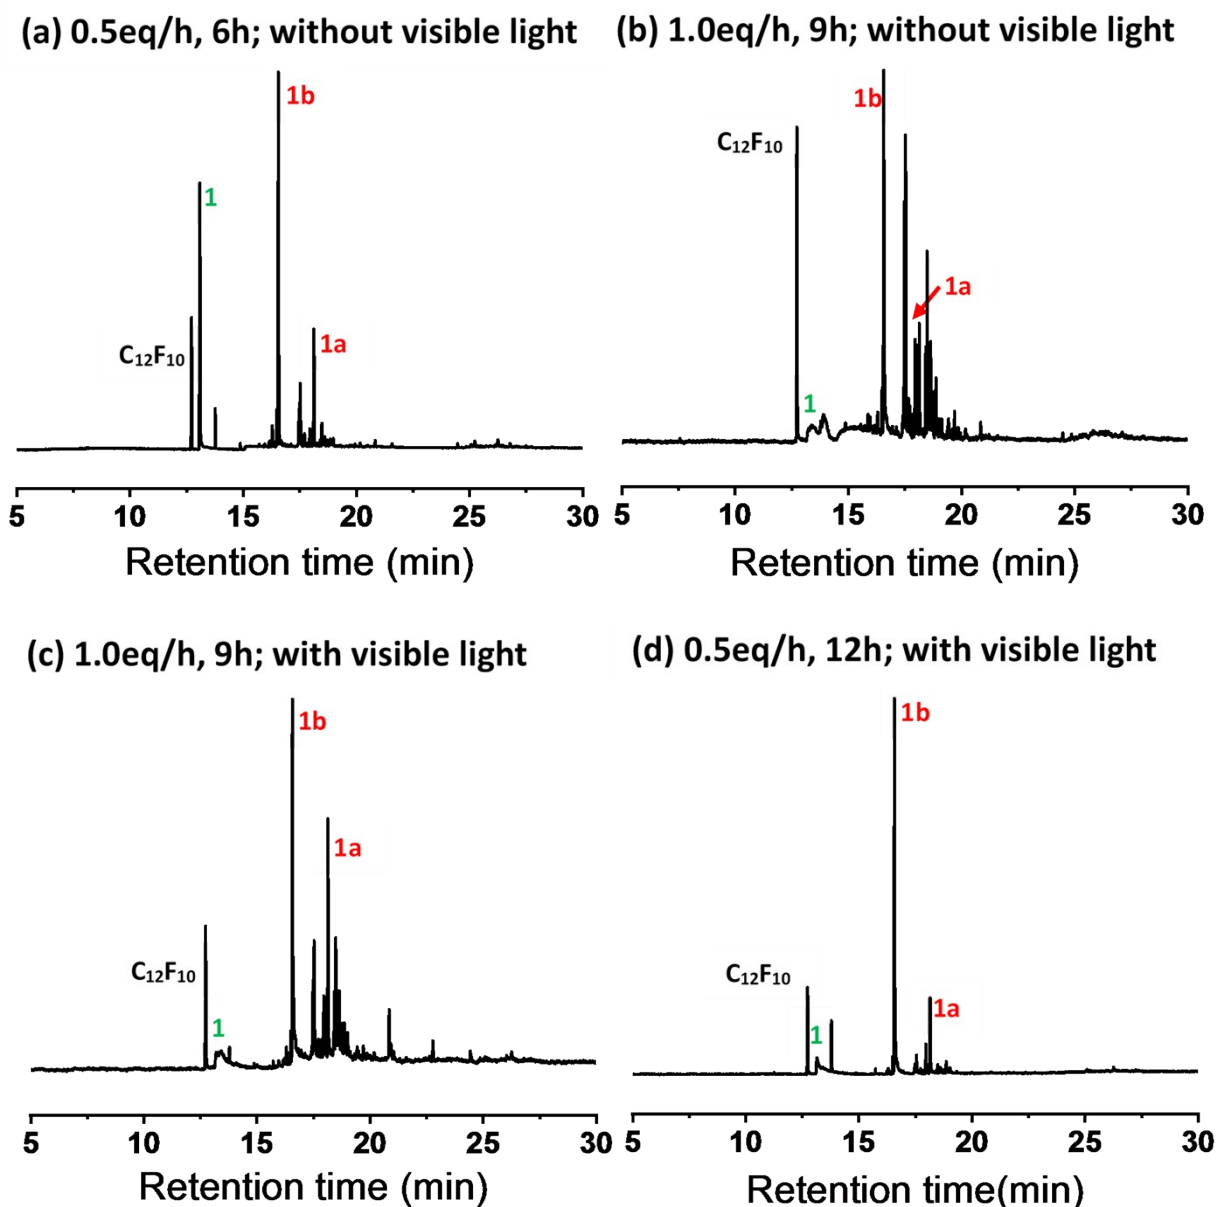

**Figure S3.** GC-MS spectra for electrochemical perfluoroalkylations of 1,4-dimethoxybenzene (**1**) as the substrate to yield the products **1a** and **1b** (here in red color) with different flow rates of 1,4- $\text{C}_4\text{F}_8\text{I}_2$  in the absence/presence of visible-light irradiation ( $\geq 420\text{nm}$ ). (a) 0.5 eq. of substrate per 1 h for 6 h, without visible light (**Table S1, entry S3**); (b) 1.0 eq. of substrate per 1 h for 9 h, without visible light (**Table S1, entry S9**); (c) 1.0 eq. of substrate per 1 h for 9 h, with visible light (**Table S1, entry S10**) and (d) 0.5 eq. of substrate per 1 h for 12 h, with visible light (**Table 1, entry 2**). Decafluorobiphenyl ( $\text{C}_{12}\text{F}_{10}$ ) and tetrabutylammonium perchlorate (TBAP,  $n\text{-Bu}_4\text{NClO}_4$ ) were used as the internal standard and supporting electrolyte, respectively.



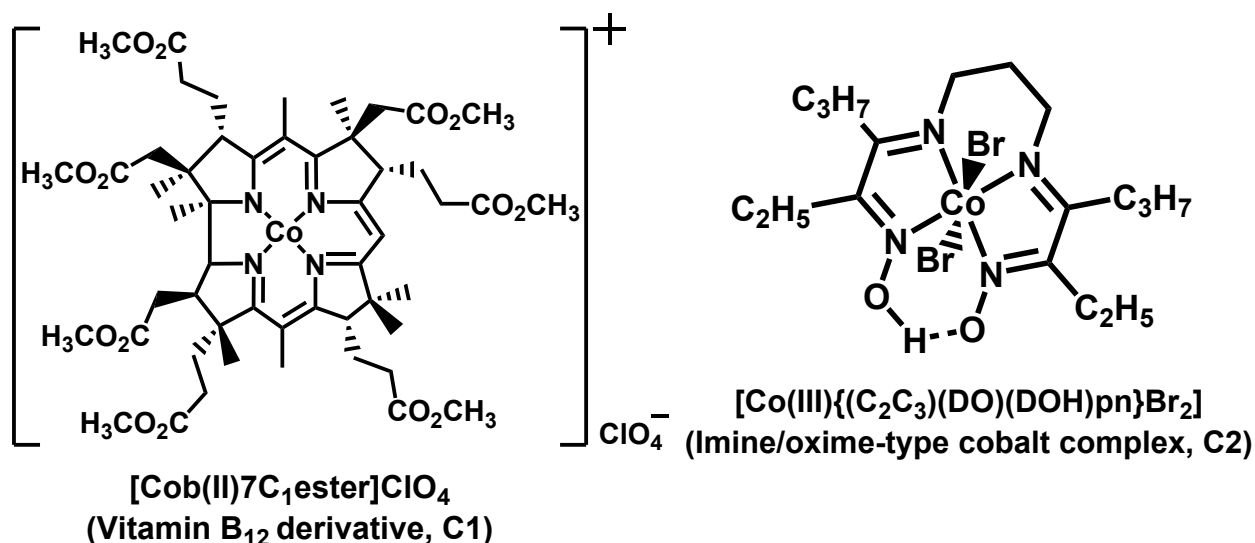

**Figure S4.** Molecular structures of [Cob(II)7C<sub>1</sub>ester]ClO<sub>4</sub> (**C1**) and [Co(III){(C<sub>2</sub>C<sub>3</sub>)(DO)(DOH)pn}Br<sub>2</sub>] (**C2**).

The initial optimized results of the reactions are summarized in **Table S1**. After extensive efforts in different solvents, such as acetonitrile (CH<sub>3</sub>CN), dimethyl sulfoxide (DMSO) and methanol (CH<sub>3</sub>OH) (**Table S1, entries S1–S3**), CH<sub>3</sub>OH was identified as a suitable solvent for this catalytic molecular transformation with the yields of the desired product **1a** to 5% and **1b** to 10% (**Table S1, entry S3; Figure S3(a)**), while other solvents almost failed to yield the desired products. Note that the absence of **C1** resulted in no formation of the desired fluoroalkylated compounds in CH<sub>3</sub>OH (**Table S1, entry S4**). Similarly, the Pt mesh cathode also almost failed to afford the desired products (**Table S1, entry S5**). Furthermore, the imine/oxime-type cobalt complex, [Co(III){(C<sub>2</sub>C<sub>3</sub>)(DO)(DOH)pn}Br<sub>2</sub>] (**C2**)<sup>7</sup> (**Figure S4**), was also examined for this molecular transformation under some conditions, such as different solvents and cathodes (**Table S1, entries S6–S8**). To our disappointed, the results were still not so well with almost no products formation. In order to improve the yield of desired products, the flow rate and concentration of 1,4-C<sub>4</sub>F<sub>8</sub>I<sub>2</sub> reagent were also measured to check the reactivity and improve the reaction conversion for better yields (**Table S1, entries S9 and S10**). We found that increased speed of 1,4-C<sub>4</sub>F<sub>8</sub>I<sub>2</sub> addition led to a slight increase with 8% yield of **1a** and 12% yield of **1b** (**Table S1, entry S9**), associating with relatively lower selectivity (**Figure S3(b)**). In our previous work, visible-light irradiation was essential for the reaction to proceed using **C1** as the catalyst.<sup>6</sup> Herein visible-light promoted molecular transformation was also evaluated. As shown in **entry S10 (Table S1)**, considerable increases in the yields of **1a** and **1b** were observed up to 30% and 23%, respectively, along with a lower selectivity (**Figure S3(c)**). To improve the selectivity and obtain better yields for desired products, further optimizations were shown in **Table 1** based on these findings.

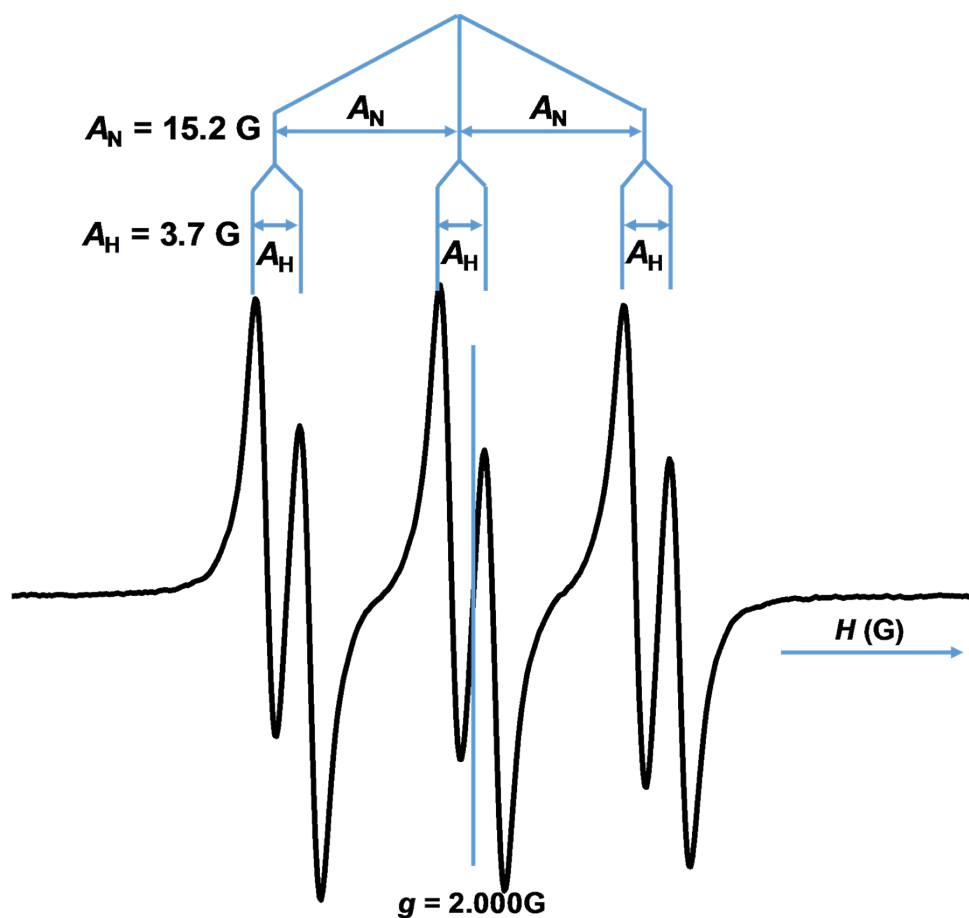

**Figure S5.** ESR spectrum observed during the electrocatalytic reaction in the presence of 6eq. *N*-tert-butyl- $\alpha$ -phenylnitrone (PBN,  $3.0 \times 10^{-1}$  M) to the 1,4-dimethoxybenzene (**1**) ( $5.0 \times 10^{-2}$  M) in methanol under nitrogen. The setting parameters for the ESR measurements were a frequency of 9.87 GHz, a power of 1.05 mW, a center field of 3515 G, a sweep width of 150 G, a modulation amplitude of 0.5 G, a time constant of 40.96 ms, and a sweep time of 20.48 s.

## Crystal Structures

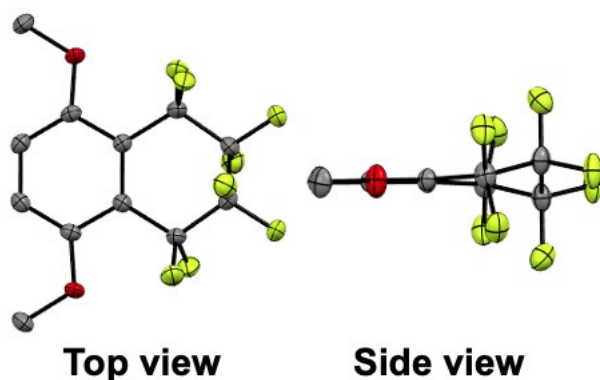

**Figure S6.** Crystal structure of **1a**. The thermal ellipsoid is drawn at 50% probability. Color code: C, gray; N, light blue; F, light green. Hydrogen atoms are omitted for clarity.

**Table S2.** Crystallographic data for **1a**.

| Compound                                             | <b>1a</b>                                                    |
|------------------------------------------------------|--------------------------------------------------------------|
| CCDC No.                                             | 2004379                                                      |
| empirical formula                                    | C <sub>12</sub> H <sub>8</sub> F <sub>8</sub> O <sub>2</sub> |
| formula weight                                       | 336.18                                                       |
| temperature [K]                                      | 123                                                          |
| wavelength [Å]                                       | 0.71073                                                      |
| crystal system                                       | monoclinic                                                   |
| space group                                          | I2/a                                                         |
| <i>a</i> [Å]                                         | 6.8488(11)                                                   |
| <i>b</i> [Å]                                         | 11.665(2)                                                    |
| <i>c</i> [Å]                                         | 15.489(2)                                                    |
| $\alpha$ [°]                                         | 90                                                           |
| $\beta$ [°]                                          | 95.319(14)                                                   |
| $\gamma$ [°]                                         | 90                                                           |
| Volume [Å <sup>3</sup> ]                             | 1232.1(4)                                                    |
| <i>Z</i>                                             | 4                                                            |
| Density (calculated) [g/cm <sup>3</sup> ]            | 1.812                                                        |
| Absorption coefficient [mm <sup>-1</sup> ]           | 0.201                                                        |
| <i>F</i> (000)                                       | 672.0                                                        |
| $\vartheta$ [°]                                      | 2.641 to 26.367                                              |
| Reflections collected                                | 1947                                                         |
| Independent reflections                              | 1947 [ <i>R</i> <sub>(int)</sub> = ?]*                       |
| Data / restraints / parameters                       | 1947 / 0 / 102                                               |
| Goodness-of-fit on <i>F</i> <sup>2</sup>             | 0.840                                                        |
| <i>R</i> 1 <sup>a</sup> [ <i>I</i> > 2σ( <i>I</i> )] | 0.0526                                                       |
| <i>wR</i> 2 <sup>b</sup> (all data)                  | 0.1383                                                       |
| Largest diff. peak and hole [e.Å <sup>-3</sup> ]     | 0.38 and -0.34                                               |

\*The *R*<sub>(int)</sub> value is not obtained due for non-merohedral twins.

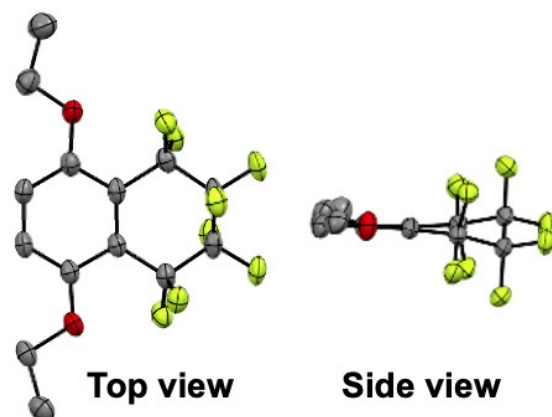

**Figure S7.** □ Crystal structure of **3a**. The thermal ellipsoid is drawn at 50% probability. Color code: C, gray; N, light blue; F, light green. Hydrogen atoms are omitted for clarity.

**Table S3.** □ Crystallographic data for **3a**.

| Compound                                             | <b>3a</b>                                                     |
|------------------------------------------------------|---------------------------------------------------------------|
| CCDC No.                                             | 2004380                                                       |
| empirical formula                                    | C <sub>14</sub> H <sub>12</sub> F <sub>8</sub> O <sub>2</sub> |
| formula weight                                       | 364.24                                                        |
| temperature [K]                                      | 123                                                           |
| wavelength [Å]                                       | 0.71073                                                       |
| crystal system                                       | monoclinic                                                    |
| space group                                          | P2 <sub>1</sub> /n                                            |
| <i>a</i> [Å]                                         | 9.7335(7)                                                     |
| <i>b</i> [Å]                                         | 19.260(2)                                                     |
| <i>c</i> [Å]                                         | 15.5646(18)                                                   |
| $\alpha$ [°]                                         | 90                                                            |
| $\beta$ [°]                                          | 94.317(8)                                                     |
| $\gamma$ [°]                                         | 90                                                            |
| Volume [Å <sup>3</sup> ]                             | 2909.5(5)                                                     |
| <i>Z</i>                                             | 8                                                             |
| Density (calculated) [g/cm <sup>3</sup> ]            | 1.663                                                         |
| Absorption coefficient [mm <sup>-1</sup> ]           | 0.177                                                         |
| <i>F</i> (000)                                       | 1472.0                                                        |
| $\theta$ [°]                                         | 2.489 to 26.372                                               |
| Reflections collected                                | 20021                                                         |
| Independent reflections                              | 5937 [ <i>R</i> <sub>(int)</sub> = 0.0684]                    |
| Data / restraints / parameters                       | 5937 / 0 / 437                                                |
| Goodness-of-fit on <i>F</i> <sup>2</sup>             | 1.041                                                         |
| <i>R</i> 1 <sup>a</sup> [ <i>I</i> > 2σ( <i>I</i> )] | 0.0611                                                        |
| <i>wR</i> 2 <sup>b</sup> (all data)                  | 0.1851                                                        |
| Largest diff. peak and hole [e.Å <sup>-3</sup> ]     | 0.70 and -0.44                                                |

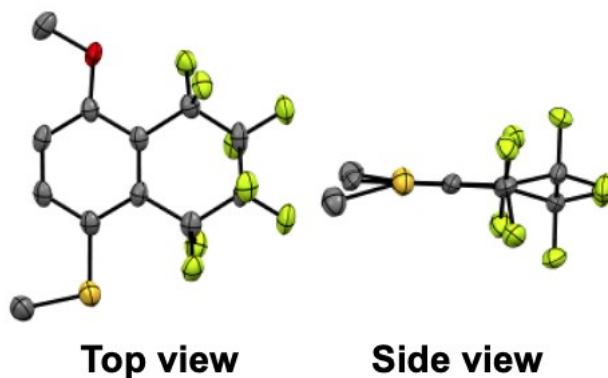

**Figure S8.** □ Crystal structure of **5a**. The thermal ellipsoid is drawn at 50% probability. Color code: C, gray; N, light blue; F, light green. Hydrogen atoms are omitted for clarity.

**Table S4.** □ Crystallographic data for **5a**.

| Compound                                             | <b>5a</b>                                        |
|------------------------------------------------------|--------------------------------------------------|
| CCDC No.                                             | 2004381                                          |
| empirical formula                                    | C <sub>12</sub> H <sub>8</sub> F <sub>8</sub> OS |
| formula weight                                       | 352.24                                           |
| temperature [K]                                      | 123                                              |
| wavelength [Å]                                       | 0.71073                                          |
| crystal system                                       | monoclinic                                       |
| space group                                          | P2 <sub>1</sub> /c                               |
| <i>a</i> [Å]                                         | 17.003(3)                                        |
| <i>b</i> [Å]                                         | 7.6340(10)                                       |
| <i>c</i> [Å]                                         | 19.904(3)                                        |
| $\alpha$ [°]                                         | 90                                               |
| $\beta$ [°]                                          | 98.327(13)                                       |
| $\gamma$ [°]                                         | 90                                               |
| Volume [Å <sup>3</sup> ]                             | 2556.3(6)                                        |
| <i>Z</i>                                             | 8                                                |
| Density (calculated) [g/cm <sup>3</sup> ]            | 1.830                                            |
| Absorption coefficient [mm <sup>-1</sup> ]           | 0.350                                            |
| <i>F</i> (000)                                       | 1408.0                                           |
| $\theta$ [°]                                         | 2.862 to 26.372                                  |
| Reflections collected                                | 16792                                            |
| Independent reflections                              | 5238 [ <i>R</i> <sub>(int)</sub> = 0.1108]       |
| Data / restraints / parameters                       | 5238 / 0 / 401                                   |
| Goodness-of-fit on <i>F</i> <sup>2</sup>             | 0.951                                            |
| <i>R</i> 1 <sup>a</sup> [ <i>I</i> > 2σ( <i>I</i> )] | 0.0748                                           |
| <i>wR</i> 2 <sup>b</sup> (all data)                  | 0.2440                                           |
| Largest diff. peak and hole [e.Å <sup>-3</sup> ]     | 0.85 and -0.63                                   |

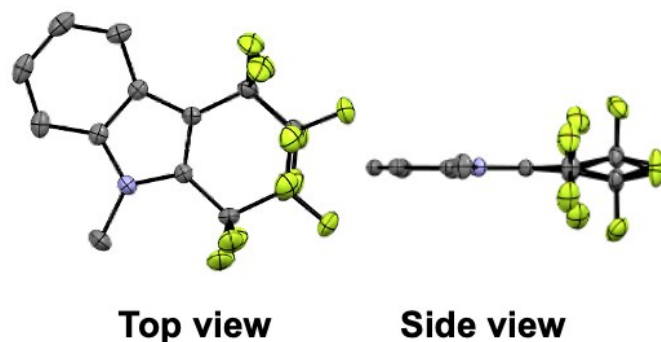

**Figure S9.** □ Crystal structure of **7a**. The thermal ellipsoid is drawn at 50% probability. Color code: C, gray; N, light blue; F, light green. Hydrogen atoms are omitted for clarity.

**Table S5.** □ Crystallographic data for **7a**.

| Compound                                             | <b>7a</b>                                       |
|------------------------------------------------------|-------------------------------------------------|
| CCDC No.                                             | 2004382                                         |
| empirical formula                                    | C <sub>13</sub> H <sub>7</sub> F <sub>8</sub> N |
| formula weight                                       | 329.20                                          |
| temperature [K]                                      | 123                                             |
| wavelength [Å]                                       | 0.71073                                         |
| crystal system                                       | orthorhombic                                    |
| space group                                          | Pnma                                            |
| <i>a</i> [Å]                                         | 13.1069(9)                                      |
| <i>b</i> [Å]                                         | 6.8506(6)                                       |
| <i>c</i> [Å]                                         | 13.7875(12)                                     |
| $\alpha$ [°]                                         | 90                                              |
| $\beta$ [°]                                          | 90                                              |
| $\gamma$ [°]                                         | 90                                              |
| Volume [Å <sup>3</sup> ]                             | 1237.98(17)                                     |
| <i>Z</i>                                             | 4                                               |
| Density (calculated) [g/cm <sup>3</sup> ]            | 1.766                                           |
| Absorption coefficient [mm <sup>-1</sup> ]           | 0.189                                           |
| <i>F</i> (000)                                       | 656.0                                           |
| $\theta$ [°]                                         | 2.855 to 25.361                                 |
| Reflections collected                                | 8233                                            |
| Independent reflections                              | 1376 [ <i>R</i> <sub>(int)</sub> = 0.0266]      |
| Data / restraints / parameters                       | 1376 / 84 / 167                                 |
| Goodness-of-fit on <i>F</i> <sup>2</sup>             | 1.054                                           |
| <i>R</i> 1 <sup>a</sup> [ <i>I</i> > 2σ( <i>I</i> )] | 0.0313                                          |
| <i>wR</i> 2 <sup>b</sup> (all data)                  | 0.0924                                          |
| Largest diff. peak and hole [e.Å <sup>-3</sup> ]     | 0.23 and -0.21                                  |

## Products data

Note: For the  $^{13}\text{C}$  NMR (F coupled), some peaks for the C of perfluoroalkyl chain and C adjacent to perfluoroalkyl chain (in most cases) are too broad to be assigned (not shown in the following data for some compounds).<sup>8</sup>

### 1,1,2,2,3,3,4,4-octafluoro-5,8-dimethoxy-1,2,3,4-tetrahydronaphthalene (1a)

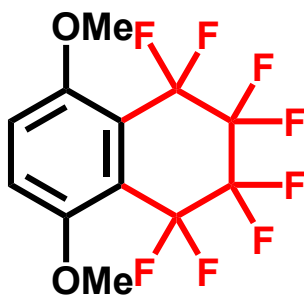

Compound **1a** was prepared according to the general procedure using octafluoro-1,4-diiodobutane, 1,4- $\text{C}_4\text{F}_8\text{I}_2$  (6 eq., 680.76 mg,  $5.0 \times 10^{-2}$  M) in 24% yield as a white solid.

$^1\text{H}$  NMR (500 MHz,  $\text{CDCl}_3$ ):  $\delta$  7.22 (s, 2H), 3.91 (s, 6H);

$^{19}\text{F}$  NMR (376 MHz,  $\text{CDCl}_3$ ):  $\delta$  -109.19 (s, 4F), -136.19 (s, 4F);

$^{13}\text{C}$  NMR (125 MHz,  $\text{CDCl}_3$ ):  $\delta$  152.8, 117.9, 57.3;

HRMS (EI,  $m/z$ ): Calcd. for  $\text{C}_{12}\text{H}_8\text{F}_8\text{O}_2$   $[\text{M}]^+$  336.0397; found: 336.0395.

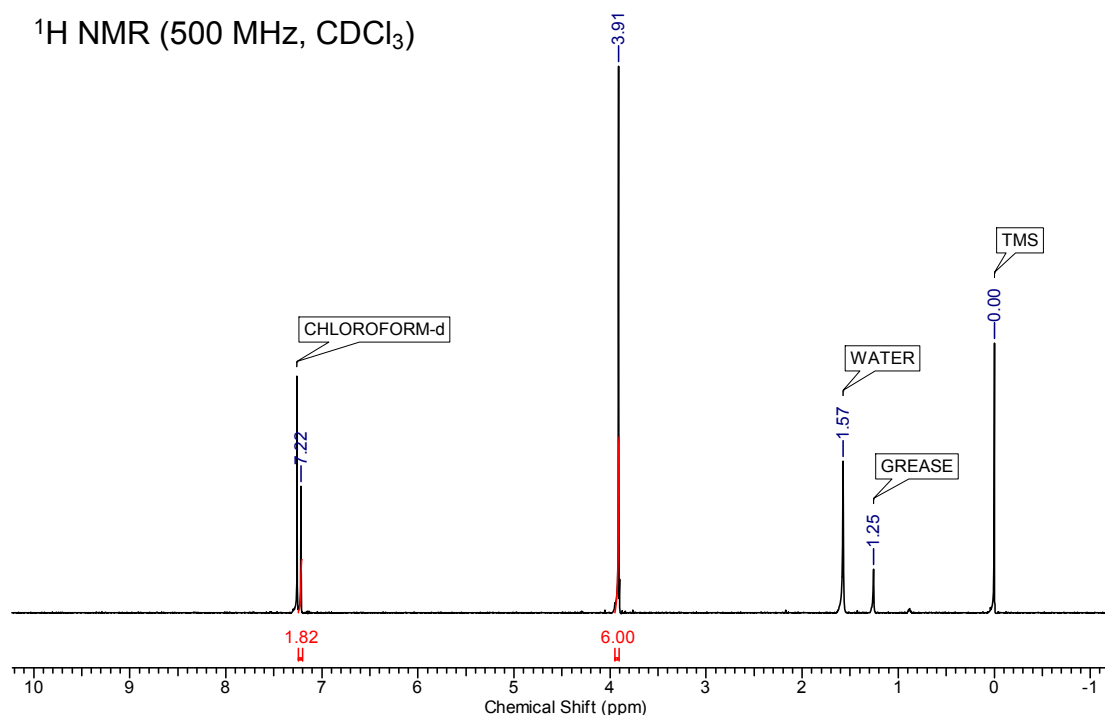

$^{19}\text{F}$  NMR (376 MHz,  $\text{CDCl}_3$ )

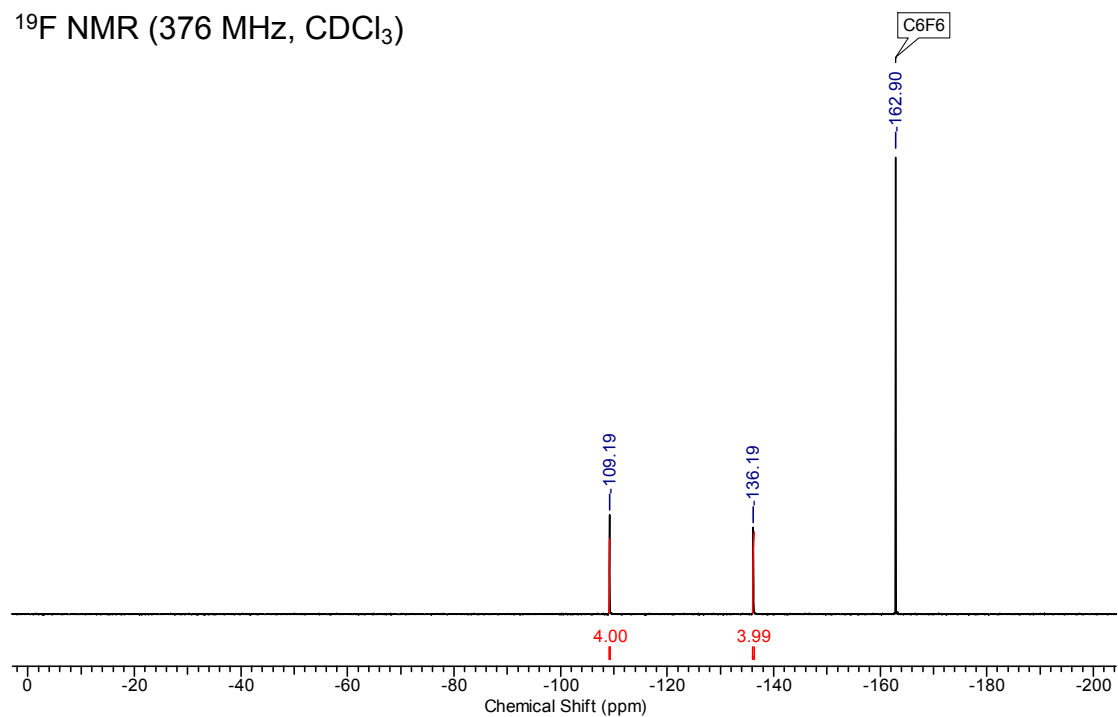

$^{13}\text{C}$  NMR (125 MHz,  $\text{CDCl}_3$ )

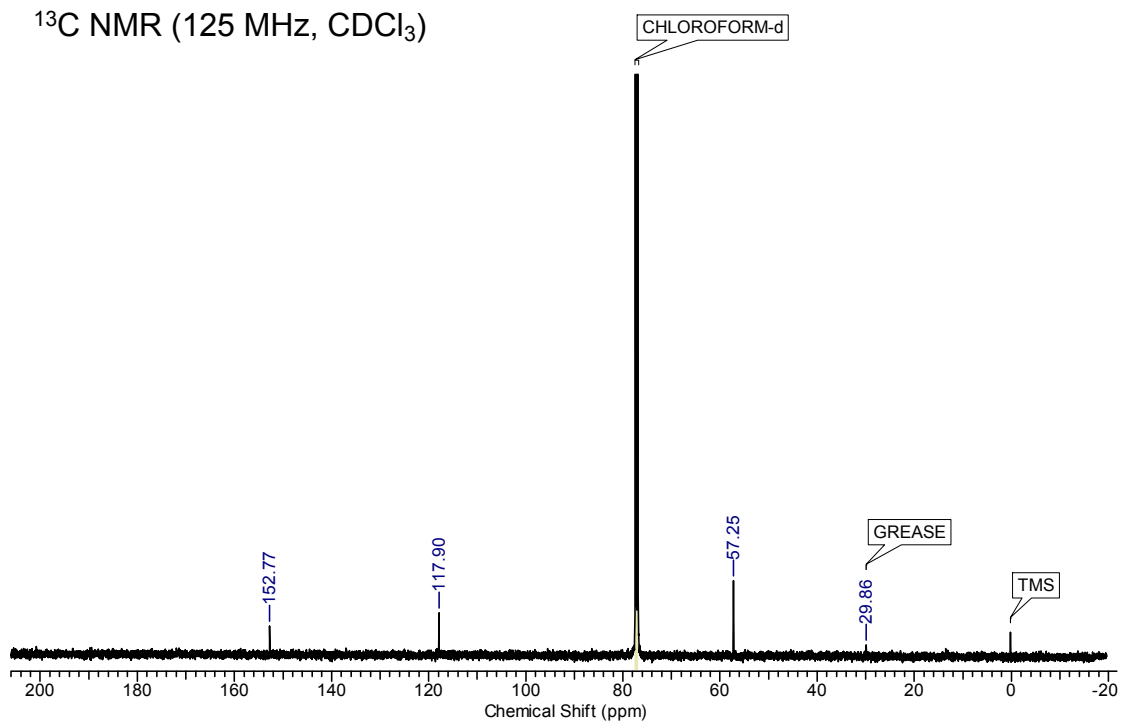



## 1,4-dimethoxy-2-((1,1,2,2,3,3,4,4-octafluorobutyl)benzene (1b)

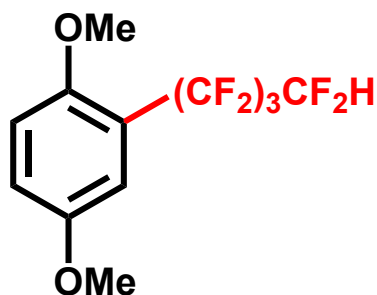

Compound **1b** was prepared according to the general procedure using octafluoro-1,4-diiodobutane, 1,4-C<sub>4</sub>F<sub>8</sub>I<sub>2</sub> (6 eq., 680.76 mg, 5.0 × 10<sup>-2</sup> M) in 41% yield as a yellow oil.

<sup>1</sup>H NMR (500 MHz, CDCl<sub>3</sub>): δ 7.06-7.03 (m, 2H), 6.96 (d, *J* = 8.83 Hz, 1H), 6.14 (tt, *J* = 52.33 Hz; 5.67 Hz, 1H), 3.81 (s, 3H), 3.80 (s, 3H);

<sup>19</sup>F NMR (376 MHz, CDCl<sub>3</sub>): δ -108.80 (s, 2F), -124.65 (s, 2F), -131.59 (s, 2F), -138.47 (d, *J* = 47.69 Hz, 2F);

<sup>13</sup>C NMR (125 MHz, CDCl<sub>3</sub>): δ 153.5, 152.8, 118.9, 118.0, 116.4, 114.8, 114.5, 108.1, 106.1, 56.9, 56.1;

HRMS (EI, *m/z*): Calcd. for C<sub>12</sub>H<sub>10</sub>F<sub>8</sub>O<sub>2</sub> [M]<sup>+</sup> 338.0553; found: 338.0547.

<sup>1</sup>H NMR (500 MHz, CDCl<sub>3</sub>)

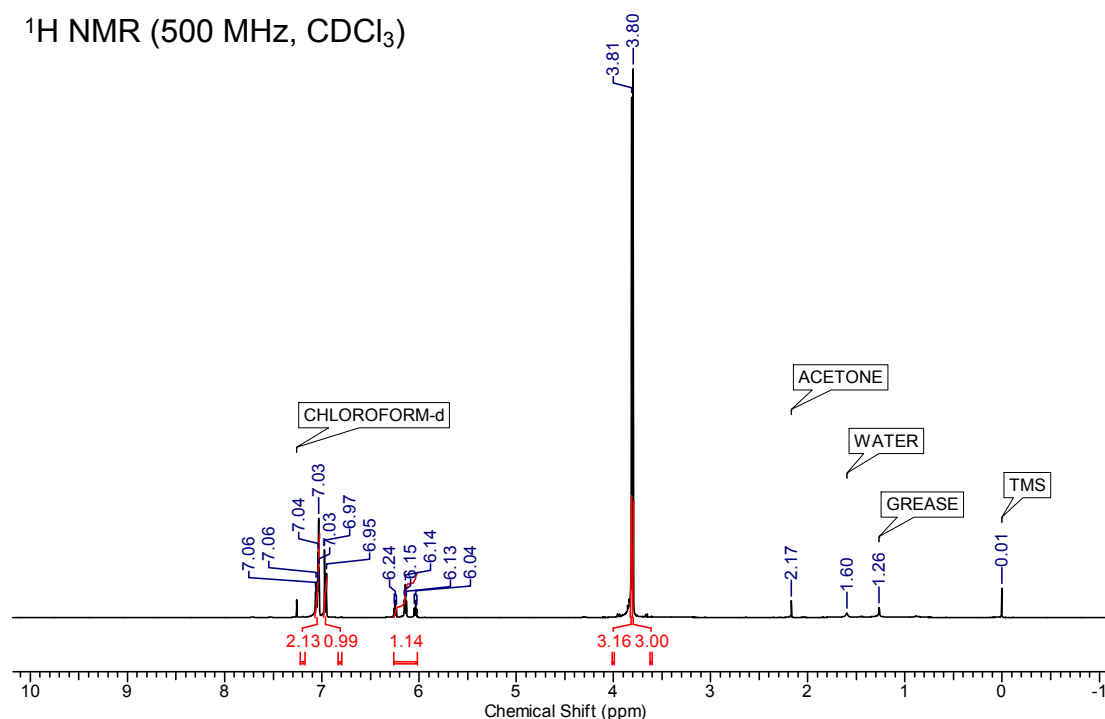

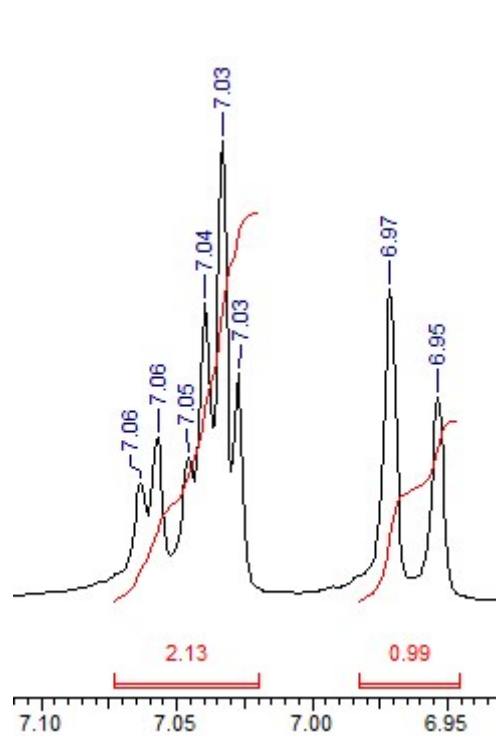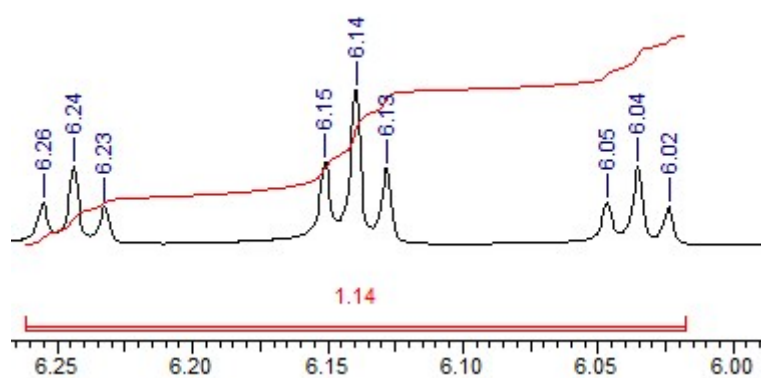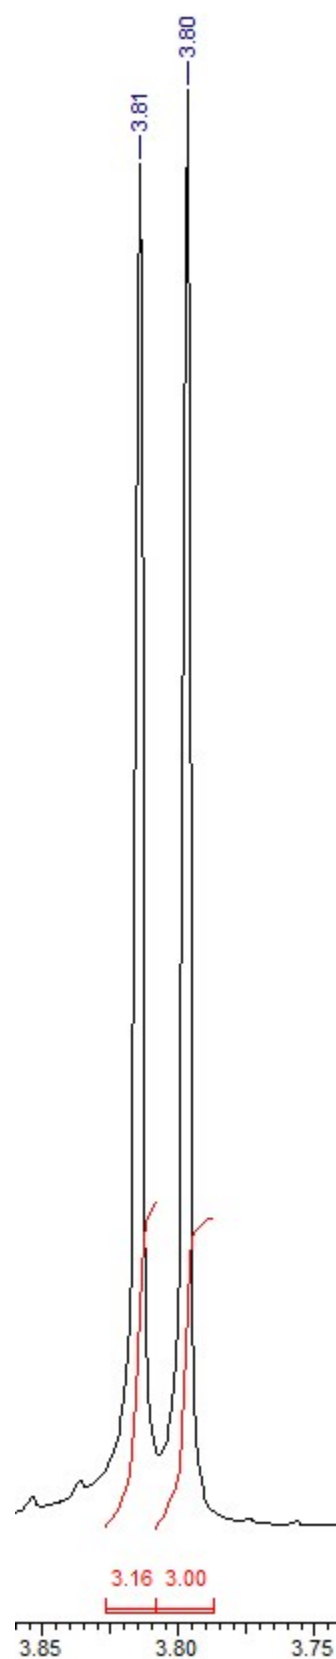

$^{19}\text{F}$  NMR (376 MHz,  $\text{CDCl}_3$ )

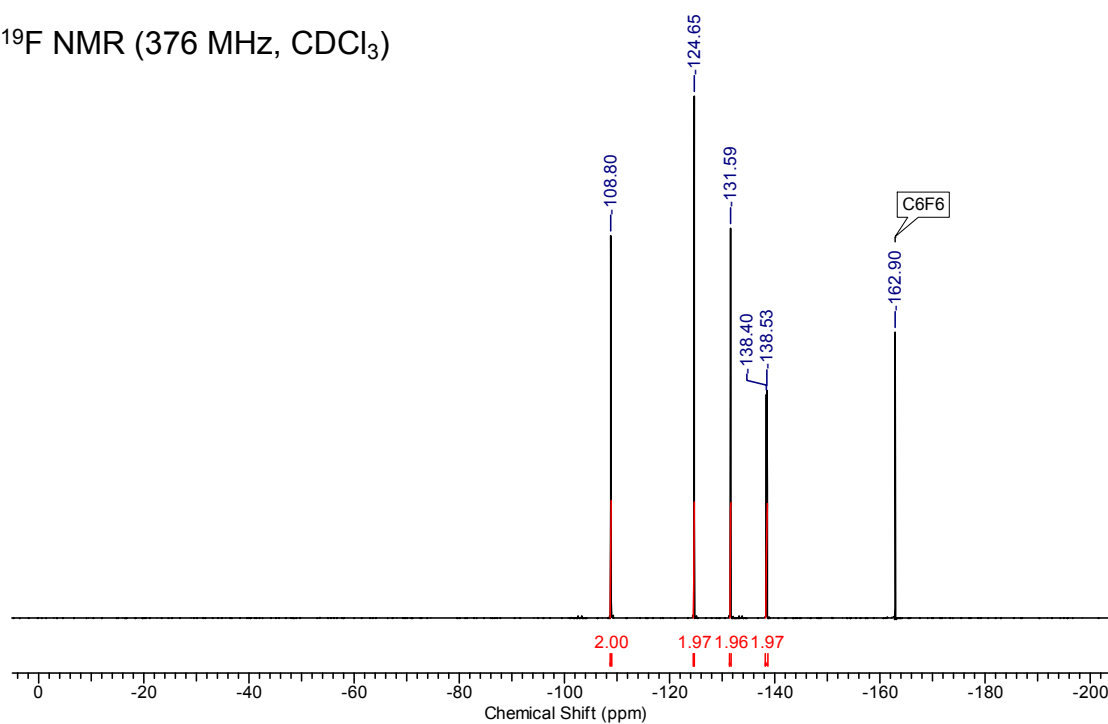

$^{13}\text{C}$  NMR (125 MHz,  $\text{CDCl}_3$ )

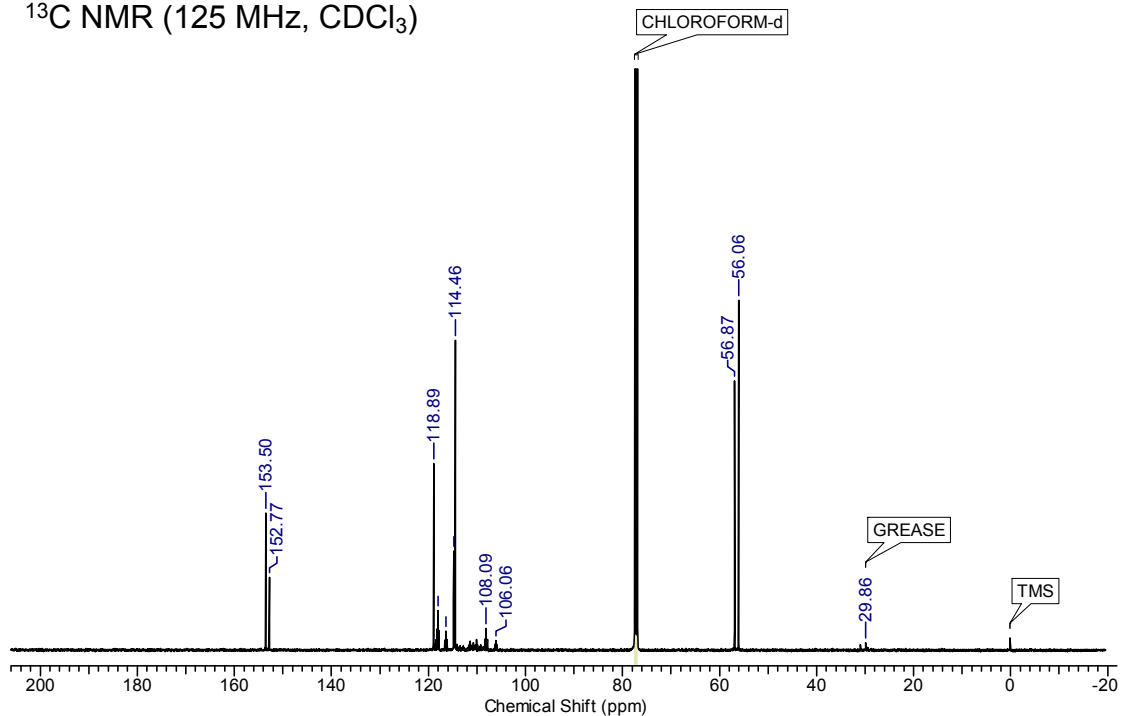

## 2-(1,1,2,2,3,3,4,4,5,5,6,6-dodecafluorohexyl)-1,4-dimethoxybenzene (1c)

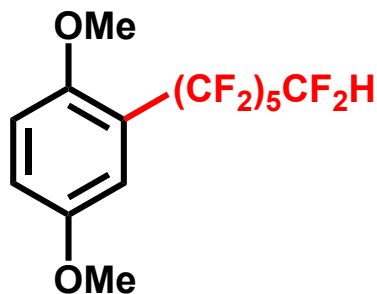

Compound **1c** was prepared according to the general procedure using dodecafluoro-1,6-diiodohexane, 1,6-C<sub>6</sub>F<sub>12</sub>I<sub>2</sub> (6 eq., 830.79 mg, 5.0 × 10<sup>-2</sup> M) in 51% yield as a colorless oil.

<sup>1</sup>H NMR (500 MHz, CDCl<sub>3</sub>): δ 7.07-7.03 (m, 2H), 6.97 (d, *J* = 8.51 Hz, 1H), 6.05 (tt, *J* = 52.02 Hz; 5.36 Hz, 1H), 3.82 (s, 3H), 3.80 (s, 3H);

<sup>19</sup>F NMR (376 MHz, CDCl<sub>3</sub>): δ -108.84 (s, 2F), -122.30 (s, 2F), -123.03 (s, 2F), -124.59 (s, 2F), -130.89 (s, 2F), -138.20 (d, *J* = 59.60 Hz, 2F);

<sup>13</sup>C NMR (125 MHz, CDCl<sub>3</sub>): δ 153.5, 152.9, 119.0, 118.2, 116.4, 114.8, 114.5, 109.9, 107.8, 105.8, 57.0, 56.1;

GC-MS (*m/z*): Calcd. for C<sub>14</sub>H<sub>10</sub>F<sub>12</sub>O<sub>2</sub> [M]<sup>+</sup> 438; found: 438.

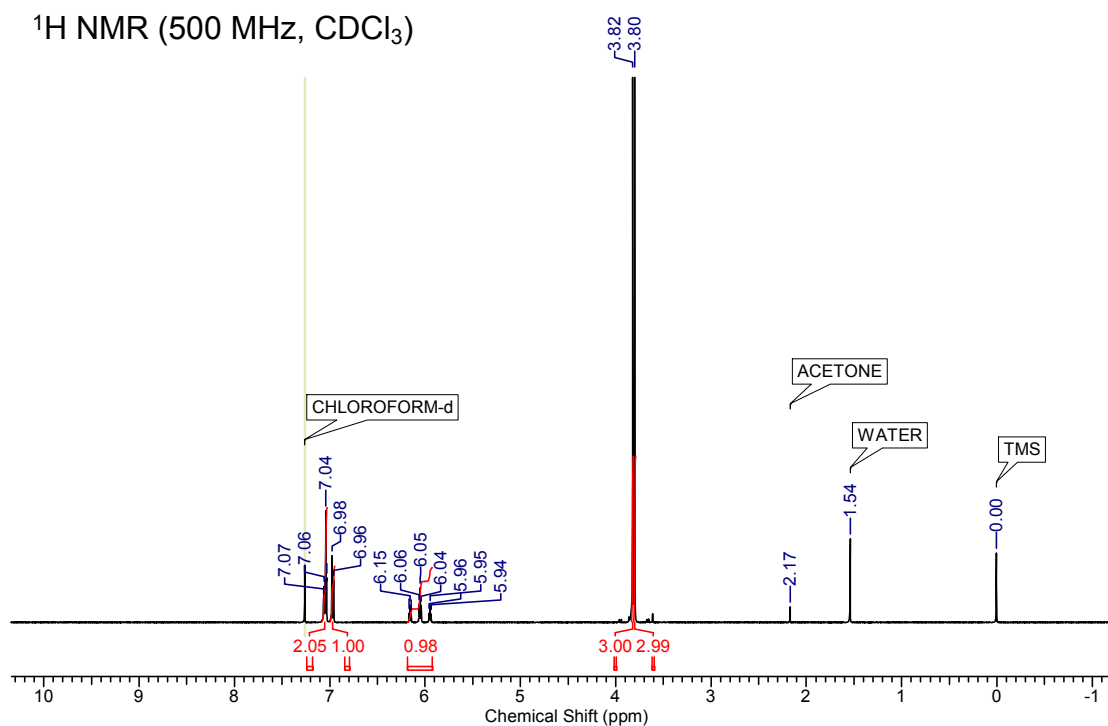

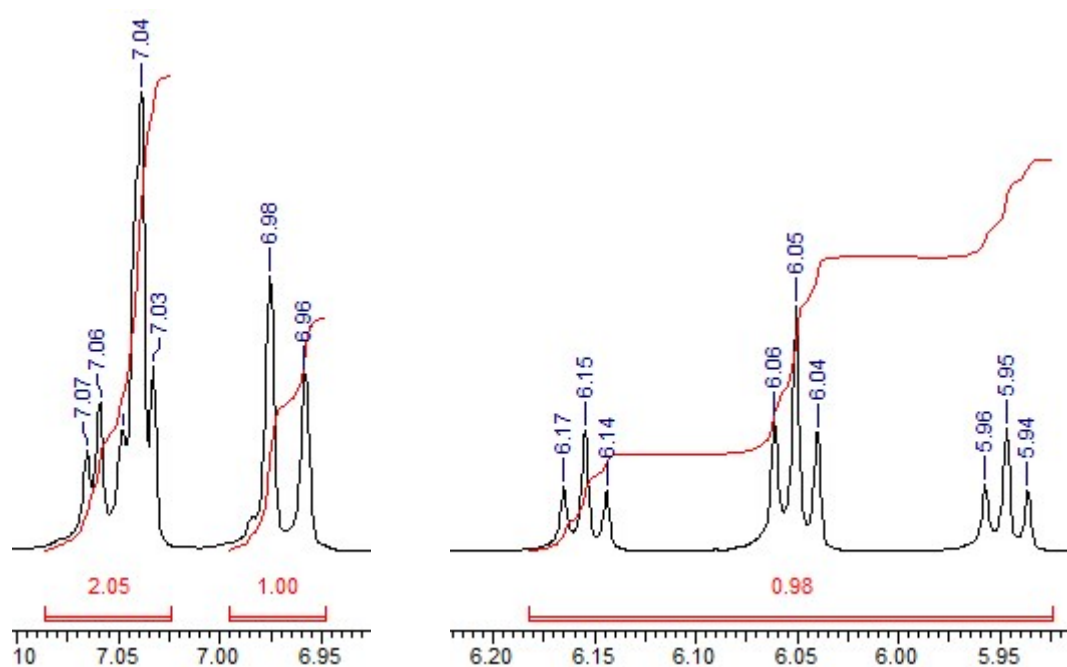

$^{19}\text{F}$  NMR (376 MHz,  $\text{CDCl}_3$ )

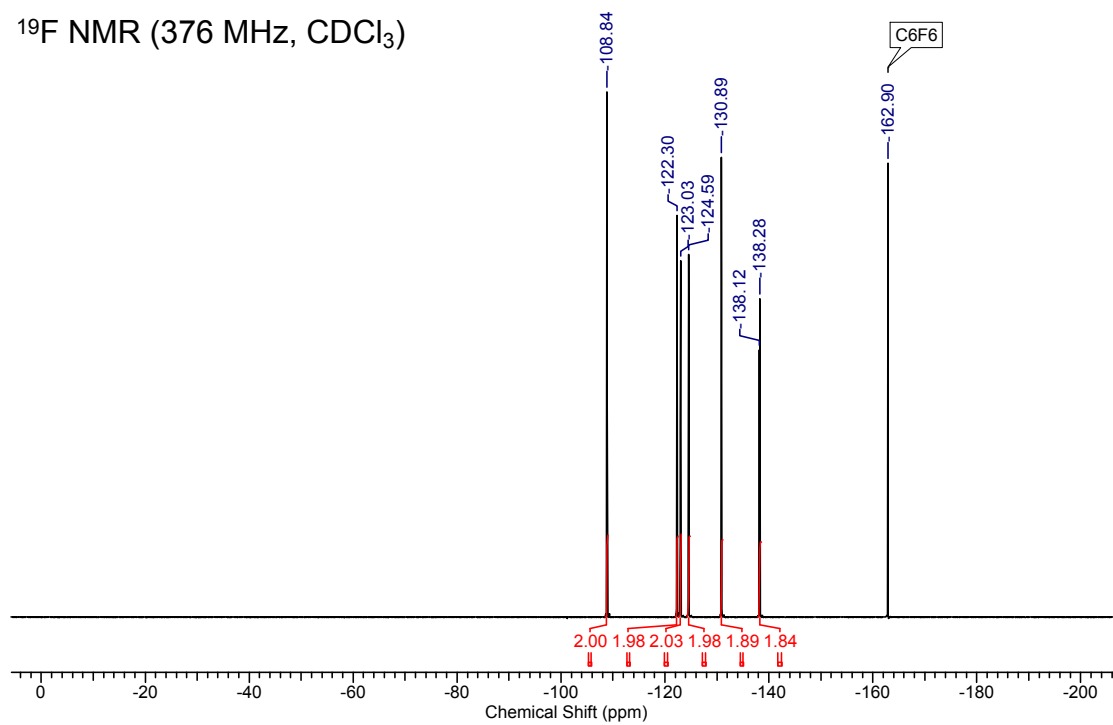

$^{13}\text{C}$  NMR (125 MHz,  $\text{CDCl}_3$ )

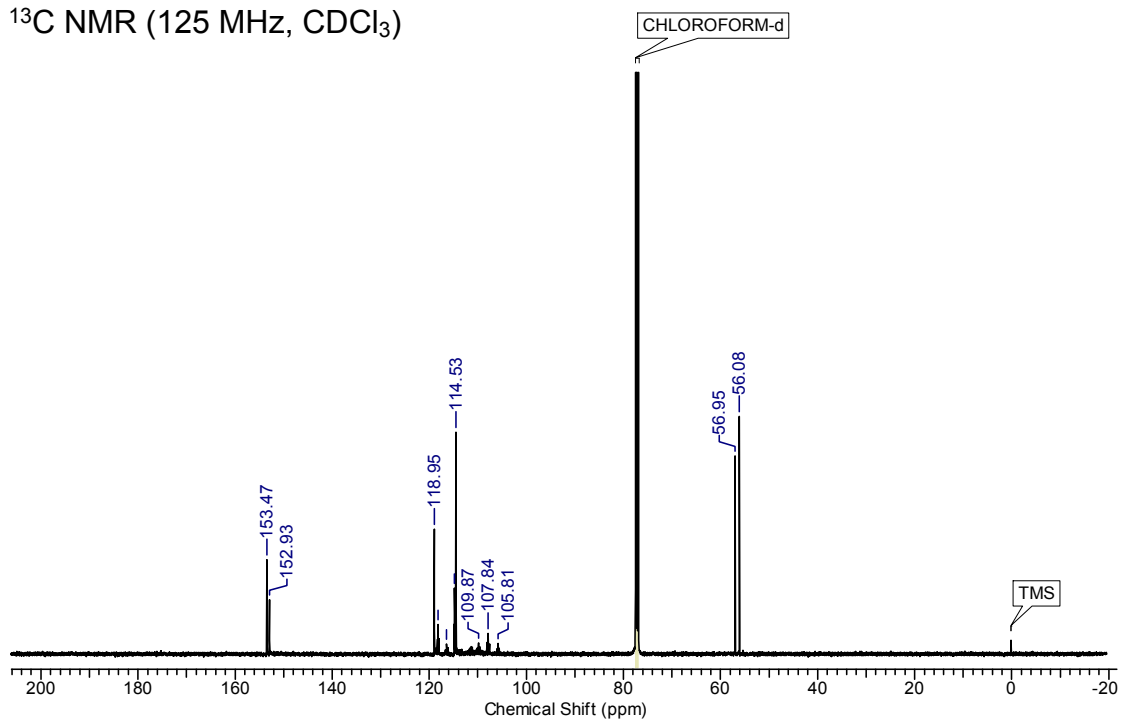

## 1,1,2,2,3,3,4,4-octafluoro-5,6,8-trimethoxy-1,2,3,4-tetrahydronaphthalene (2a)

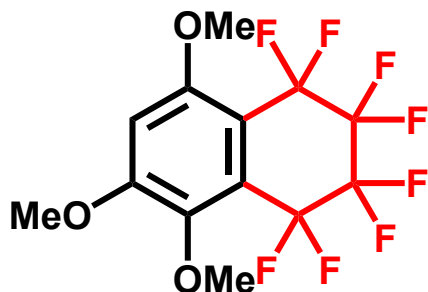

Compound **2a** was prepared according to the general procedure using octafluoro-1,4-diiodobutane, 1,4-C<sub>4</sub>F<sub>8</sub>I<sub>2</sub> (6 eq., 680.76 mg,  $5.0 \times 10^{-2}$  M) in 11% yield as a white solid.

<sup>1</sup>H NMR (500 MHz, CDCl<sub>3</sub>):  $\delta$  6.77 (s, 1H), 3.98 (s, 3H), 3.94 (s, 3H), 3.88 (s, 3H);

<sup>19</sup>F NMR (376 MHz, CDCl<sub>3</sub>):  $\delta$  -107.38 (s, 2F), -107.54 (s, 2F), -135.93 (s, 2F), -136.06 (s, 2F);

<sup>13</sup>C NMR (125 MHz, CDCl<sub>3</sub>):  $\delta$  157.7, 156.4, 142.3, 101.8, 62.0, 57.1, 56.4;

HRMS (EI,  $m/z$ ): Calcd. for C<sub>13</sub>H<sub>10</sub>F<sub>8</sub>O<sub>3</sub> [M]<sup>+</sup> 366.0502; found: 366.0511.

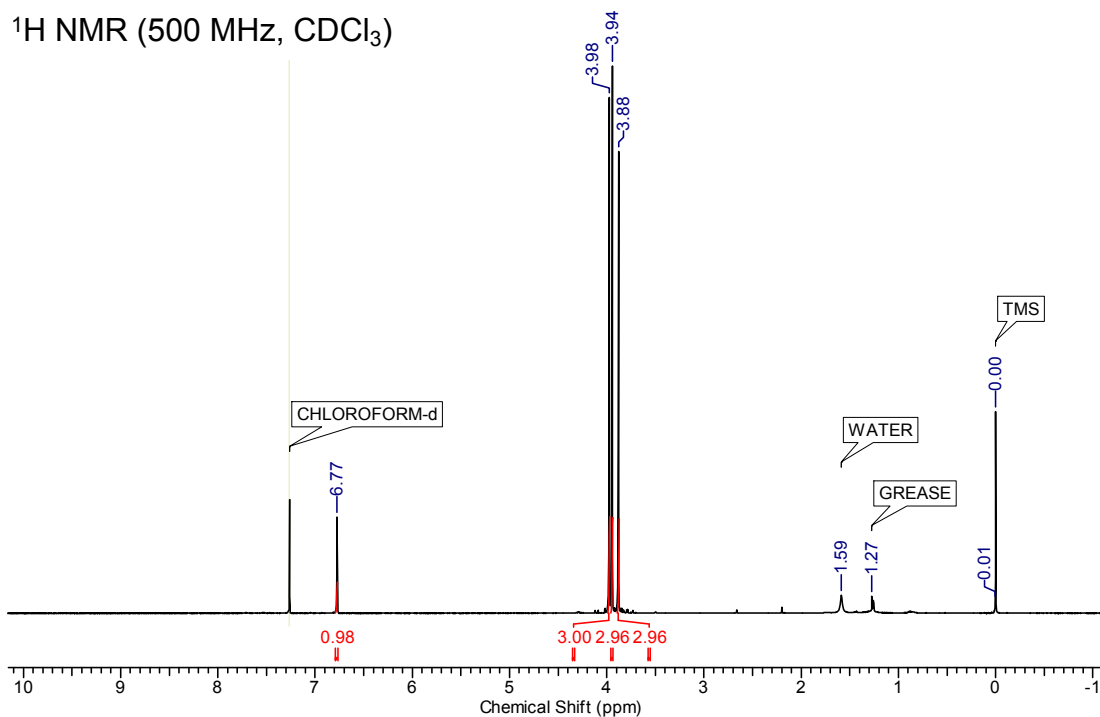

$^{19}\text{F}$  NMR (376 MHz,  $\text{CDCl}_3$ )

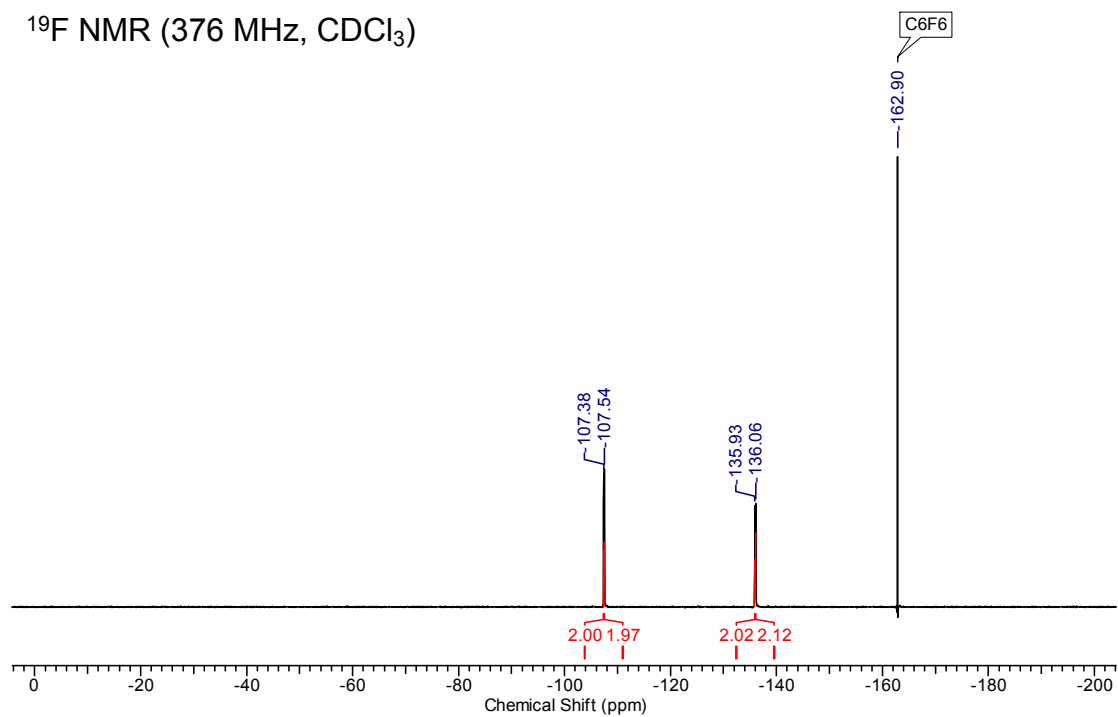

$^{13}\text{C}$  NMR (125 MHz,  $\text{CDCl}_3$ )

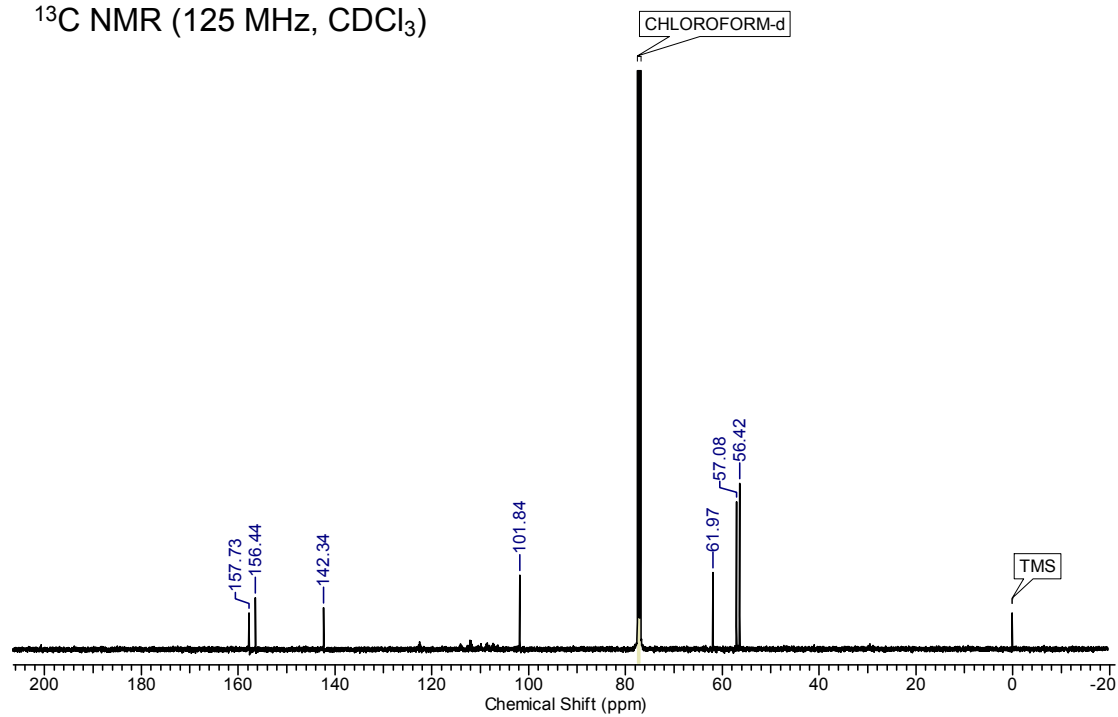



## 1,2,5-trimethoxy-3-((1,1,2,2,3,3,4,4-octafluorobutyl)benzene (**2b**)

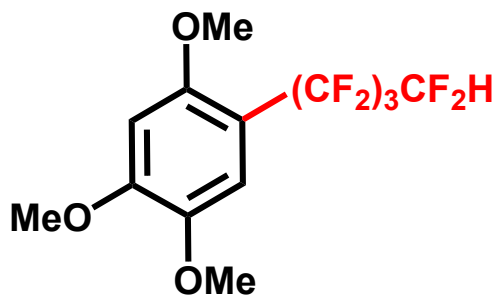

Compound **2b** was prepared according to the general procedure using octafluoro-1,4-diiodobutane, 1,4-C<sub>4</sub>F<sub>8</sub>I<sub>2</sub> (6 eq., 680.76 mg, 5.0 × 10<sup>-2</sup> M) in 29% yield as a yellow oil.

<sup>1</sup>H NMR (500 MHz, CDCl<sub>3</sub>): δ 6.93 (s, 1H), 6.58 (s, 1H), 6.13 (tt, *J* = 52.33 Hz; 5.67 Hz, 1H), 3.93 (s, 3H), 3.85 (s, 3H), 3.84 (s, 3H);

<sup>19</sup>F NMR (376 MHz, CDCl<sub>3</sub>): δ -107.54 (s, 2F), -124.65 (s, 2F), -131.40 (s, 2F), -138.31 (d, *J* = 47.68 Hz, 2F);

<sup>13</sup>C NMR (125 MHz, CDCl<sub>3</sub>): δ 153.9, 153.3, 143.2, 118.6, 116.6, 114.5, 112.3, 108.3, 106.1, 98.7, 57.1, 56.9, 56.2;

HRMS (EI, *m/z*): Calcd. for C<sub>13</sub>H<sub>12</sub>F<sub>8</sub>O<sub>3</sub> [M]<sup>+</sup> 368.0659; found: 368.0659.

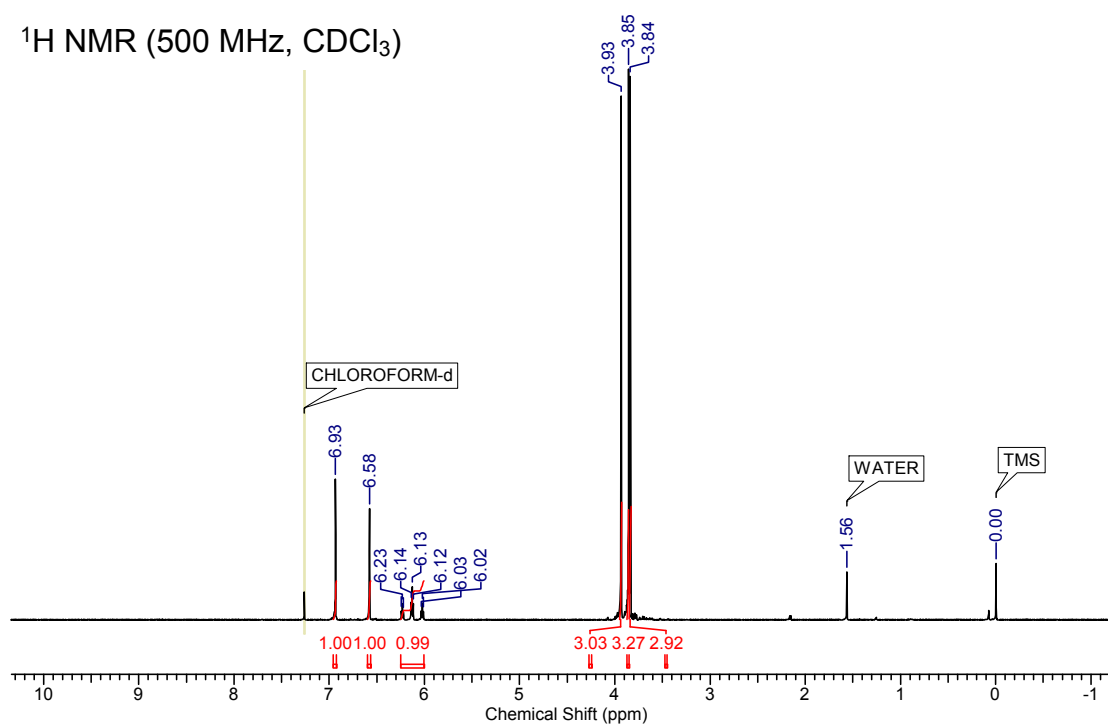

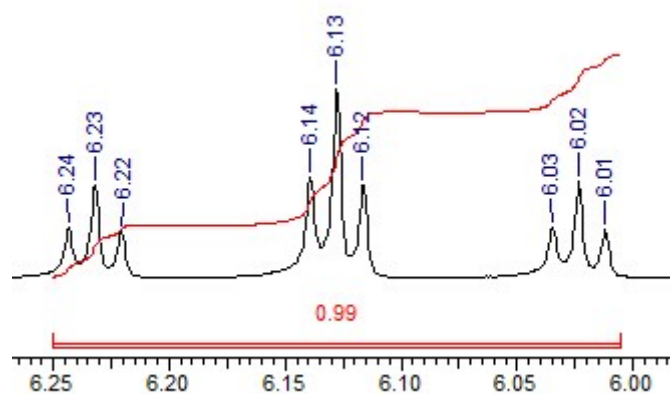

<sup>19</sup>F NMR (376 MHz, CDCl<sub>3</sub>)

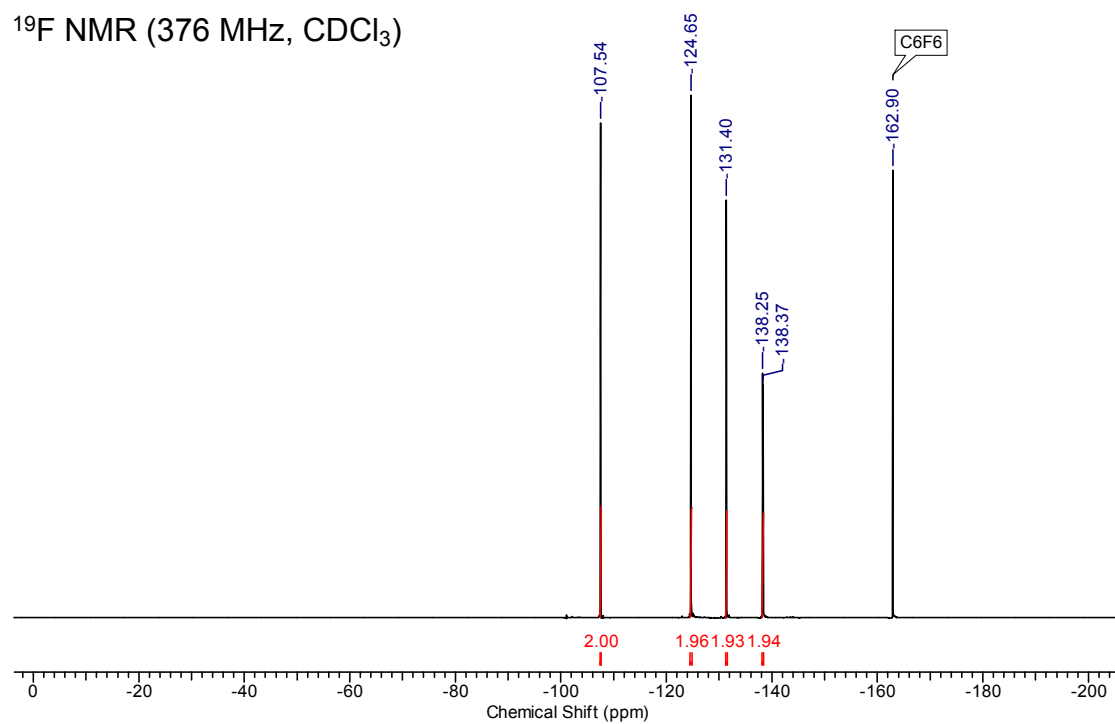

$^{13}\text{C}$  NMR (125 MHz,  $\text{CDCl}_3$ )

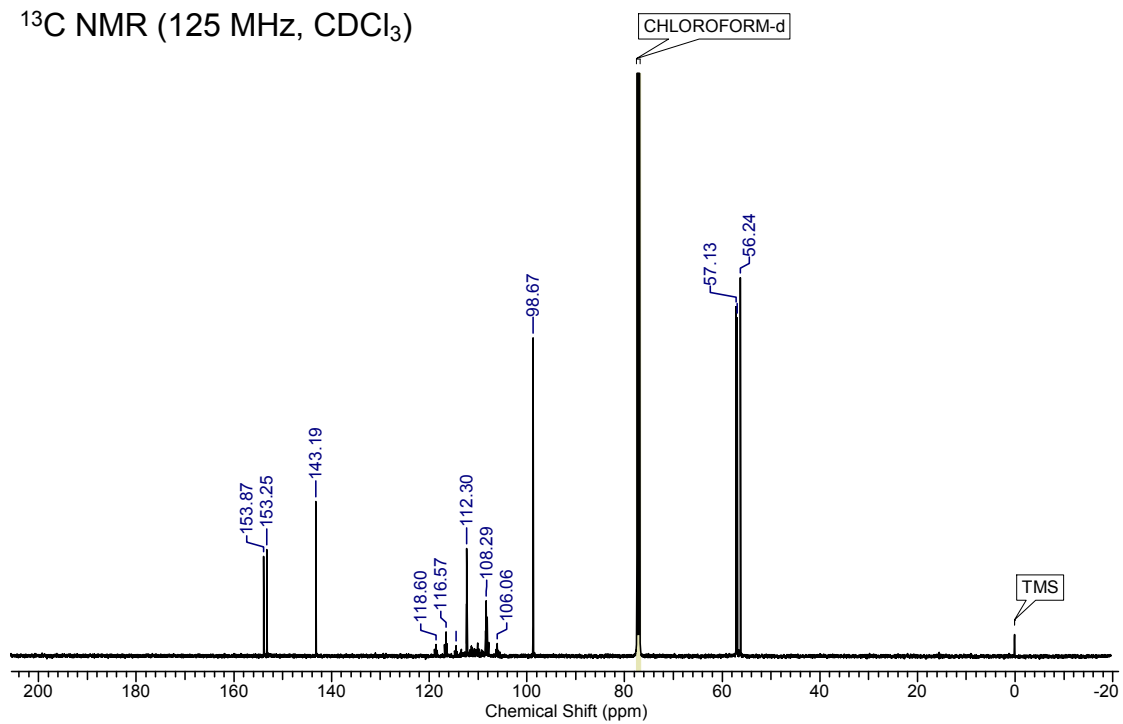

### 5,8-diethoxy-1,1,2,2,3,3,4,4-octafluoro-1,2,3,4-tetrahydronaphthalene (3a)

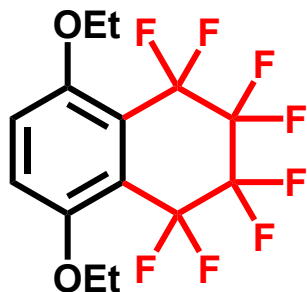

Compound **3a** was prepared according to the general procedure using octafluoro-1,4-diiodobutane, 1,4-C<sub>4</sub>F<sub>8</sub>I<sub>2</sub> (6 eq., 680.76 mg, 5.0 × 10<sup>-2</sup> M) in 9% yield as a white solid.

<sup>1</sup>H NMR (500 MHz, CDCl<sub>3</sub>): δ 7.18 (s, 2H), 4.11 (q, *J* = 6.94 Hz, 4H), 1.45 (t, *J* = 6.94 Hz, 6H);

<sup>19</sup>F NMR (376 MHz, CDCl<sub>3</sub>): δ -109.06 (s, 4F), -136.28 (s, 4F);

<sup>13</sup>C NMR (125 MHz, CDCl<sub>3</sub>): δ 152.1, 119.0, 66.2, 14.8;

HRMS (EI, *m/z*): Calcd. for C<sub>14</sub>H<sub>12</sub>F<sub>8</sub>O<sub>2</sub> [M]<sup>+</sup> 364.0710; found: 364.0711.

<sup>1</sup>H NMR (500 MHz, CDCl<sub>3</sub>)

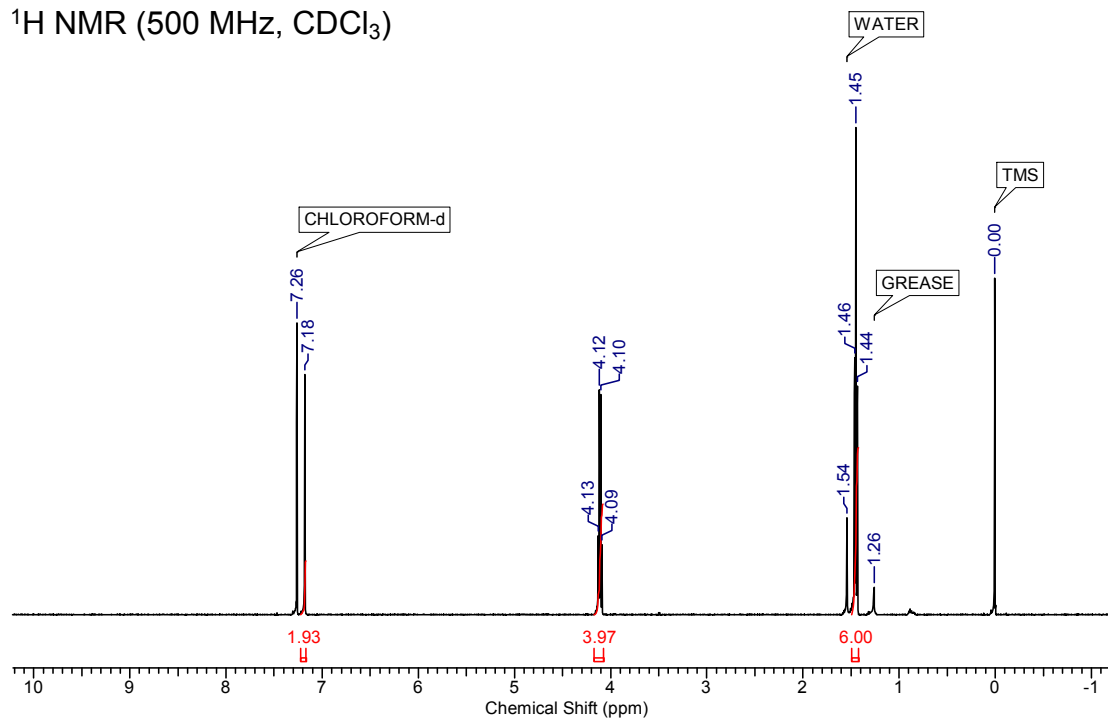

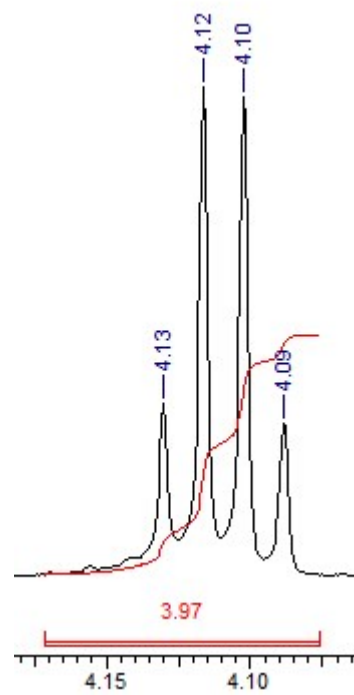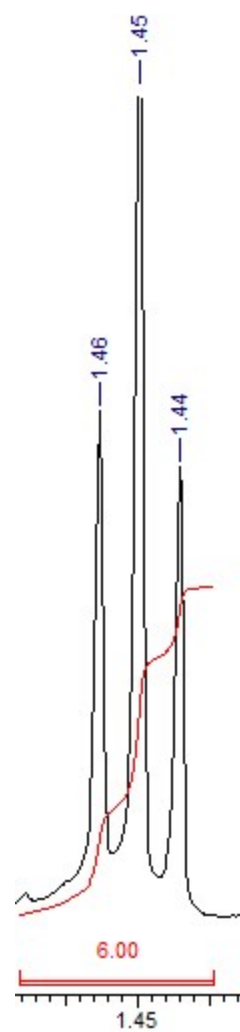

$^{19}\text{F}$  NMR (376 MHz,  $\text{CDCl}_3$ )

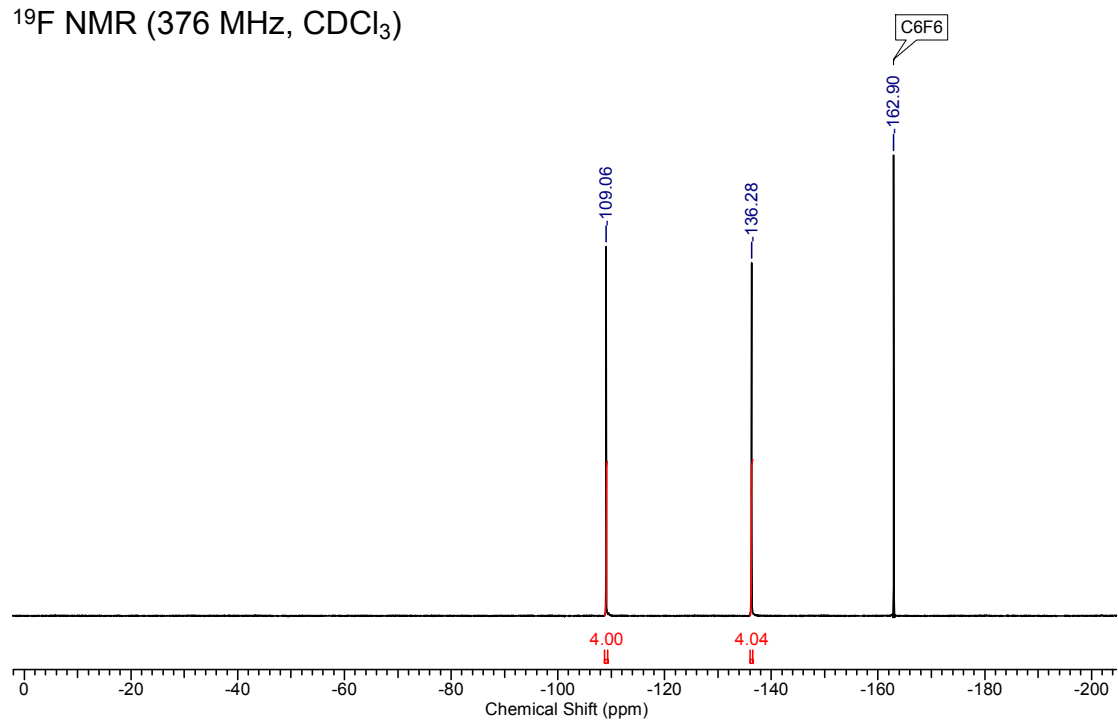

$^{13}\text{C}$  NMR (125 MHz,  $\text{CDCl}_3$ )

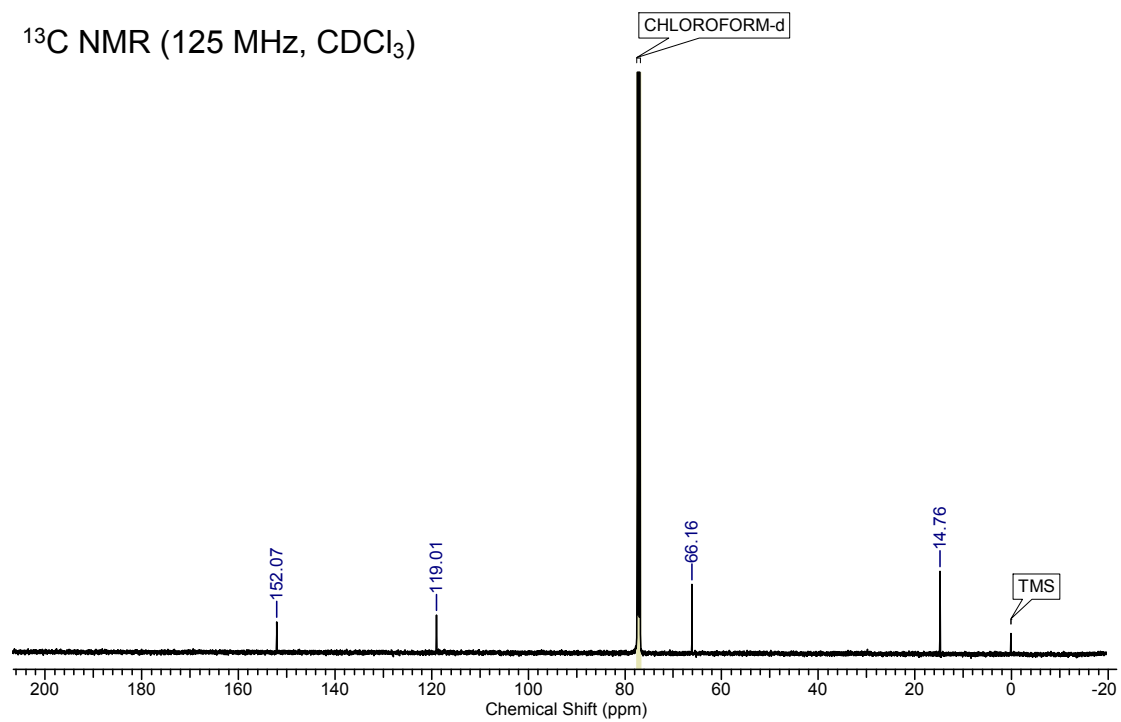

### 1,4-diethoxy-2-(1,1,2,2,3,3,4,4-octafluorobutyl)benzene (3b)

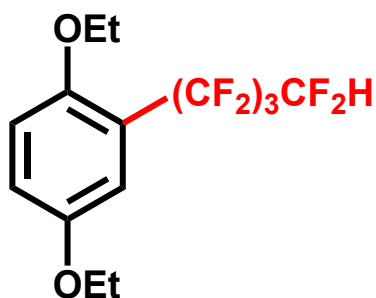

Compound **3b** was prepared according to the general procedure using octafluoro-1,4-diiodobutane, 1,4-C<sub>4</sub>F<sub>8</sub>I<sub>2</sub> (6 eq., 680.76 mg, 5.0 × 10<sup>-2</sup> M) in 14% yield as a yellow oil.

<sup>1</sup>H NMR (500 MHz, CDCl<sub>3</sub>): δ 7.02-7.00 (m, 2H), 6.93-6.91 (m, 1H), 6.15 (tt, *J* = 52.33 Hz; 5.67 Hz, 1H), 4.04-3.98 (m, 4H), 1.41-1.36 (m, 6H);

<sup>19</sup>F NMR (376 MHz, CDCl<sub>3</sub>): δ -108.61 (s, 2F), -124.46 (s, 2F), -131.72 (s, 2F), -138.50 (d, *J* = 47.69 Hz, 2F);

<sup>13</sup>C NMR (125 MHz, CDCl<sub>3</sub>): δ 152.6, 152.0, 119.6, 118.1, 116.4, 115.4, 115.3, 115.2, 65.5, 64.5, 14.9, 14.7;

HRMS (EI, *m/z*): Calcd. for C<sub>14</sub>H<sub>14</sub>F<sub>8</sub>O<sub>2</sub> [M]<sup>+</sup> 366.0866; found: 366.0866.

<sup>1</sup>H NMR (500 MHz, CDCl<sub>3</sub>)

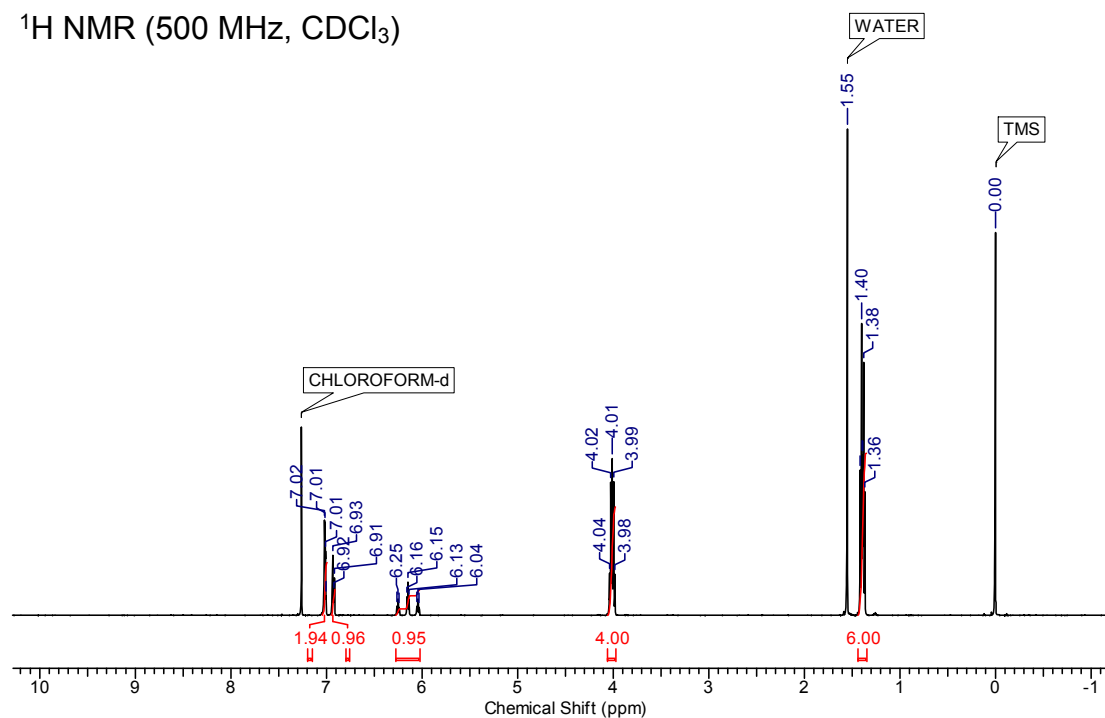

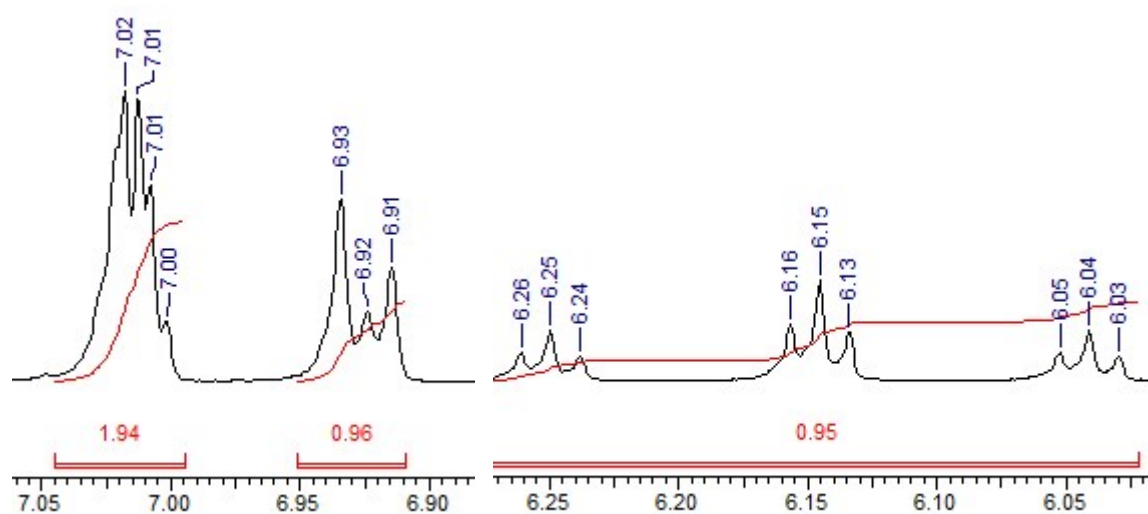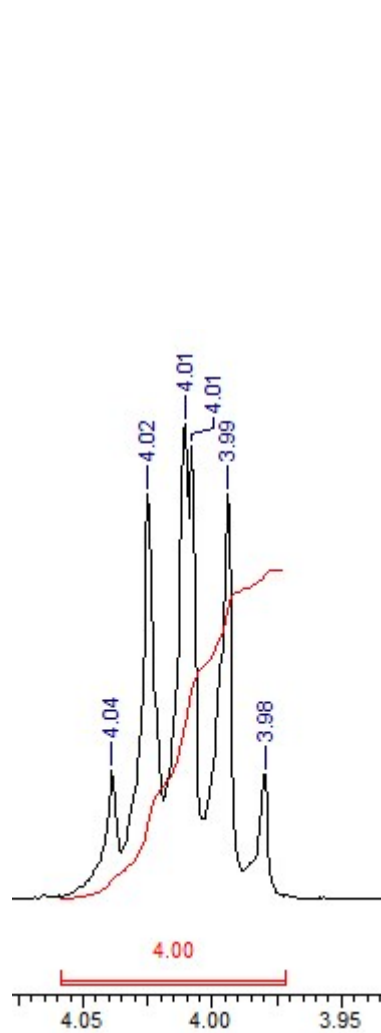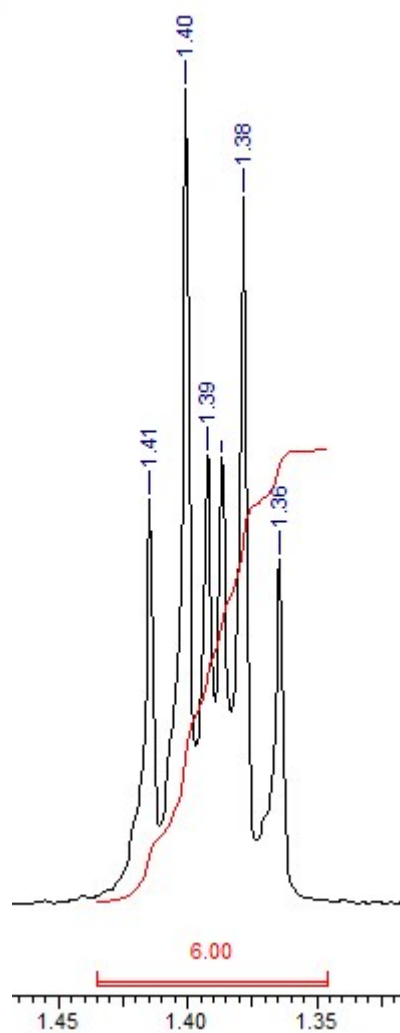



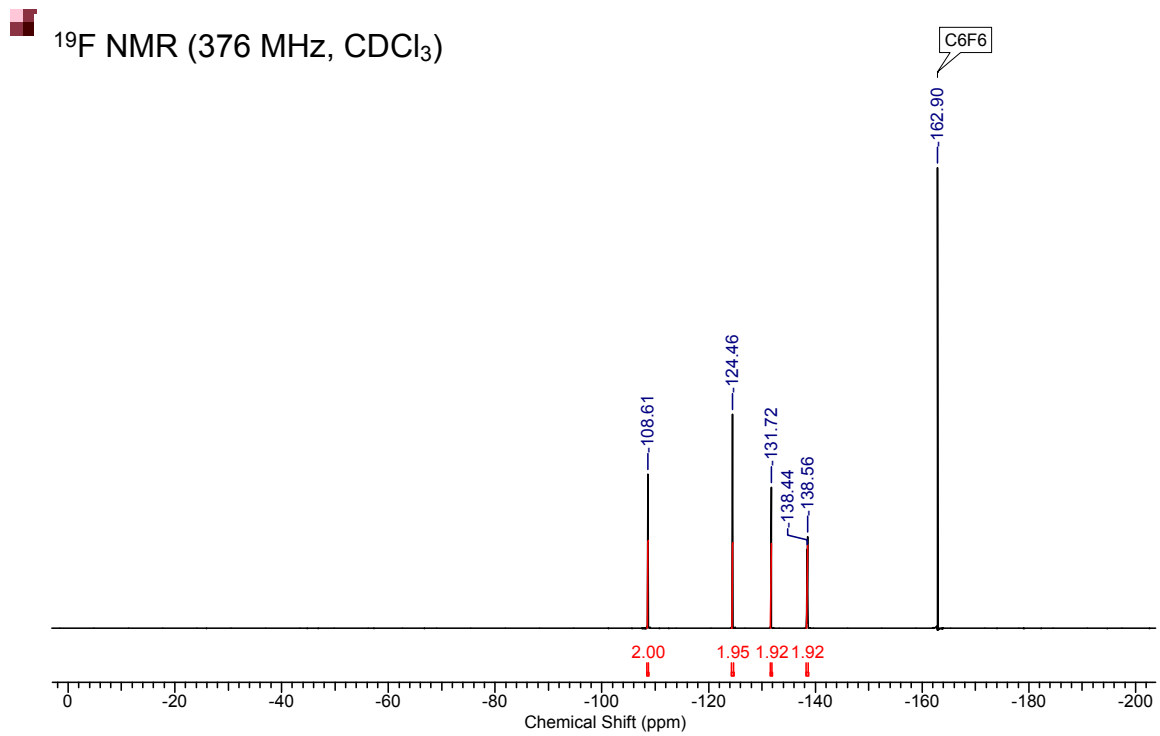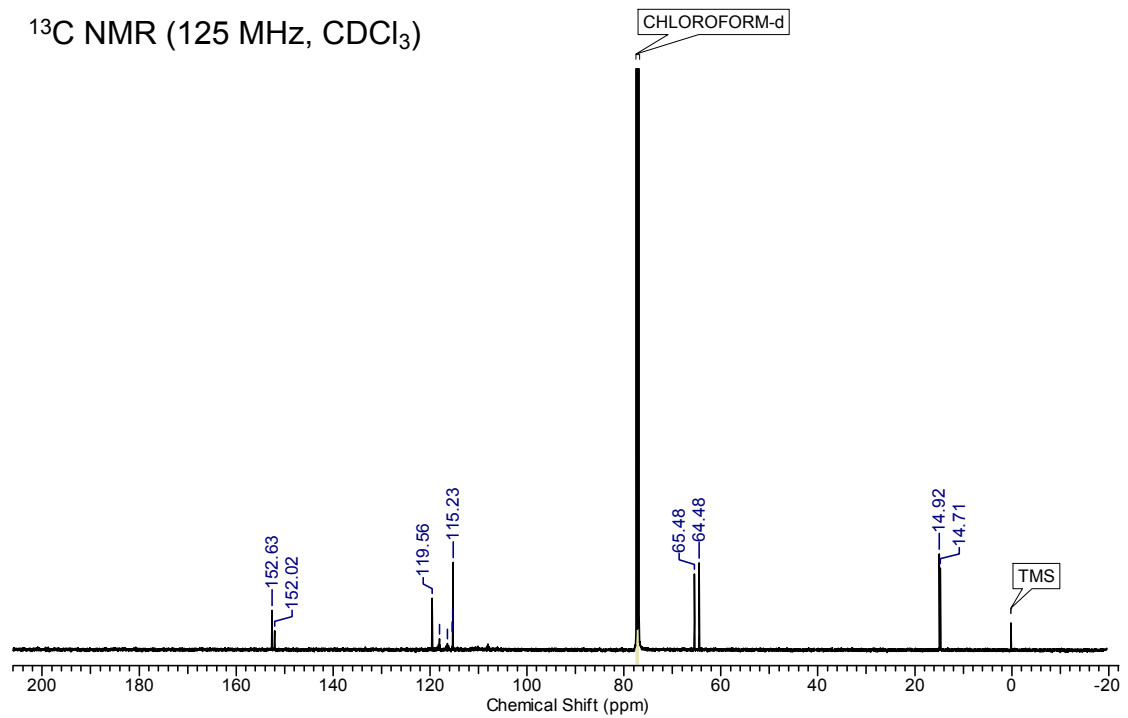

**5,5,6,6,7,7,8,8-octafluoro-2,2-dimethyl-5,6,7,8-tetrahydronaphtho[2,3-*d*][1,3]dioxole (4a)**

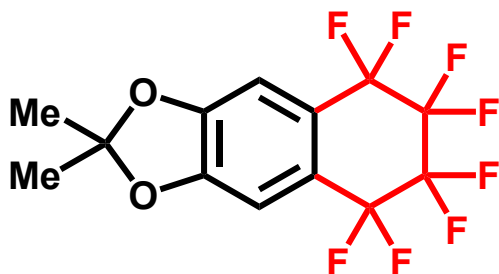

Compound **4a** was prepared according to the general procedure using octafluoro-1,4-diiodobutane, 1,4-C<sub>4</sub>F<sub>8</sub>I<sub>2</sub> (6 eq., 680.76 mg, 5.0 × 10<sup>-2</sup> M) in 7% yield as a white solid.

<sup>1</sup>H NMR (500 MHz, CDCl<sub>3</sub>): δ 7.08 (s, 2H), 1.75 (s, 6H);

<sup>19</sup>F NMR (376 MHz, CDCl<sub>3</sub>): δ -102.47 (s, 4F), -135.20 (s, 4F);

<sup>13</sup>C NMR (125 MHz, CDCl<sub>3</sub>): 151.9, 121.9, 105.3, 26.1

HRMS (EI, *m/z*): Calcd. for C<sub>13</sub>H<sub>8</sub>F<sub>8</sub>O<sub>2</sub> [M]<sup>+</sup> 348.0397; found: 348.0381

<sup>1</sup>H NMR (500 MHz, CDCl<sub>3</sub>)

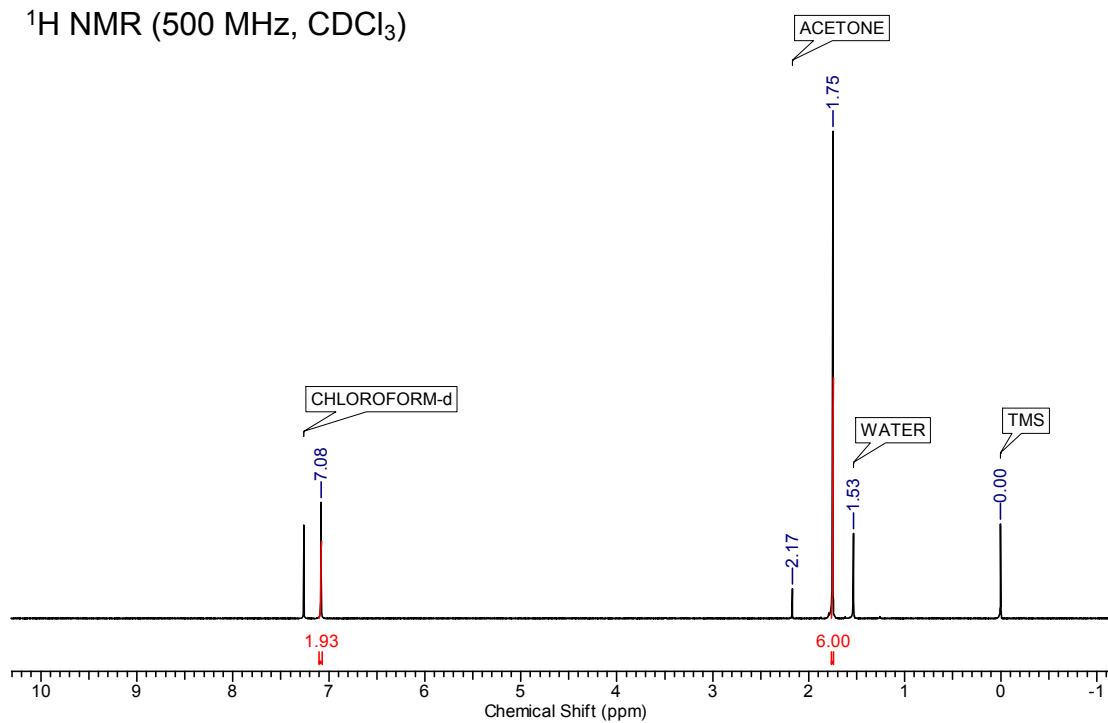

$^{19}\text{F}$  NMR (376 MHz,  $\text{CDCl}_3$ )

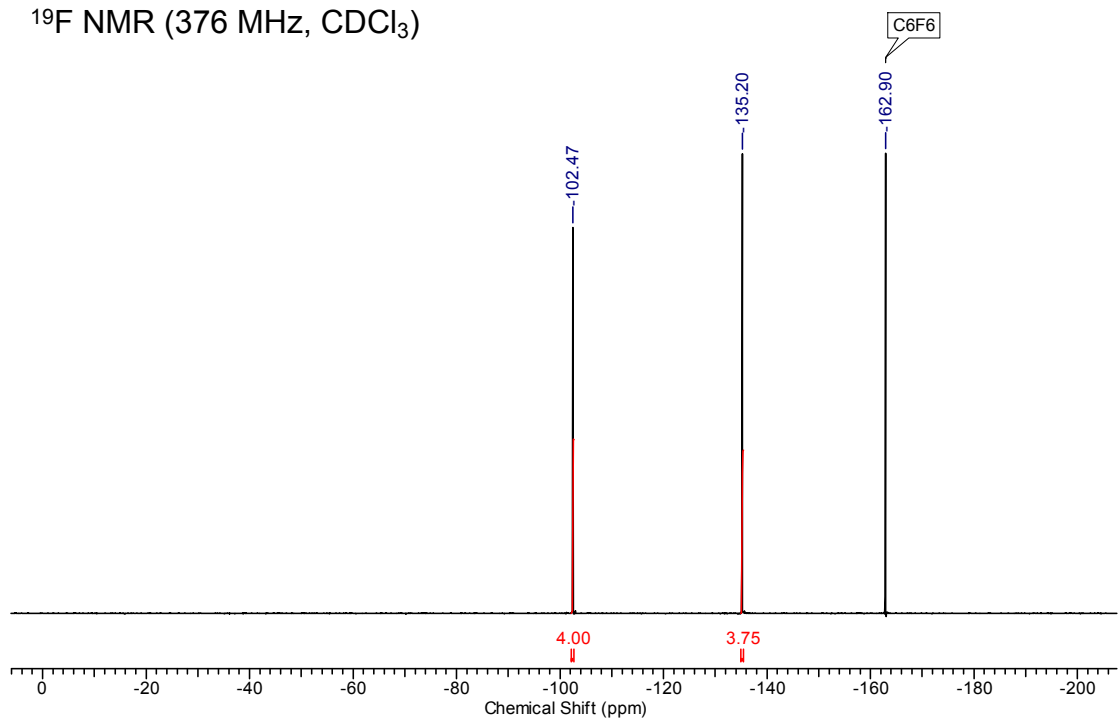

$^{13}\text{C}$  NMR (125 MHz,  $\text{CDCl}_3$ )

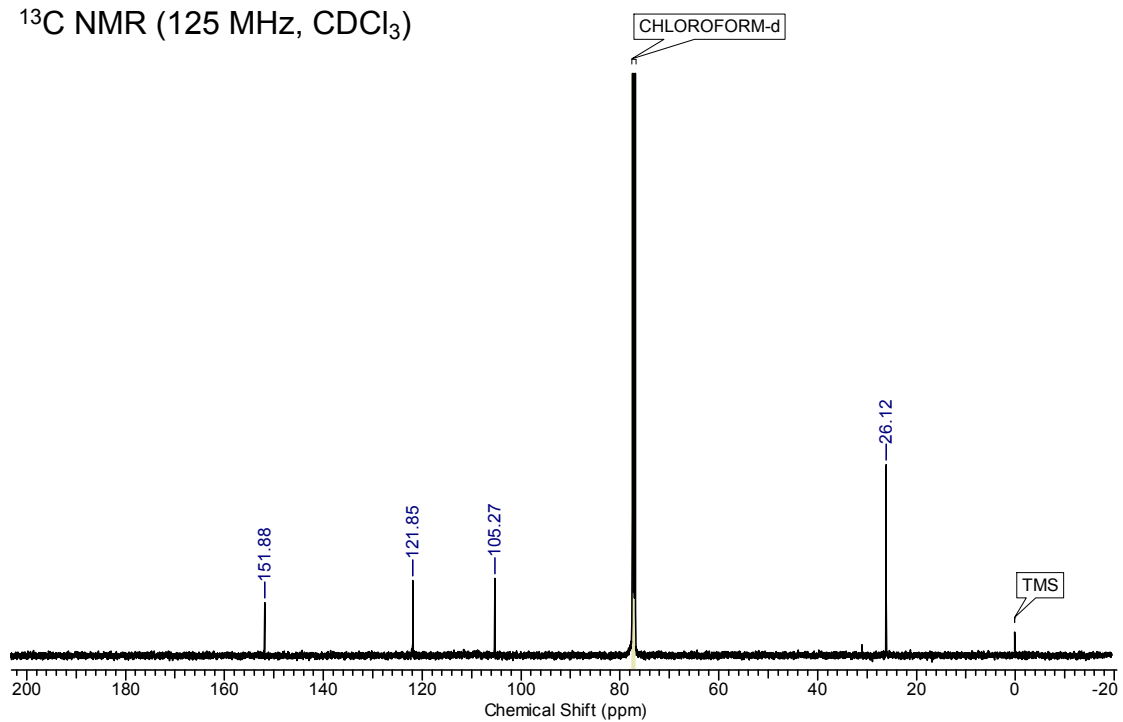

**2,2-dimethyl-5-(1,1,2,2,3,3,4,4-octafluorobutyl)benzo[*d*][1,3]dioxole (4b)**

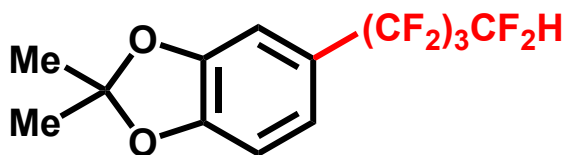

Compound **4b** was prepared according to the general procedure using octafluoro-1,4-diiodobutane, 1,4- $\text{C}_4\text{F}_8\text{I}_2$  (6 eq., 680.76 mg,  $5.0 \times 10^{-2}$  M) in 16% yield as a colorless oil.

$^1\text{H}$  NMR (500 MHz,  $\text{CDCl}_3$ ):  $\delta$  7.04 (d,  $J = 8.20$  Hz, 1H), 6.90 (s, 1H), 6.80 (d,  $J = 8.20$  Hz, 1H), 6.07 (tt,  $J = 52.02$  Hz; 5.67 Hz, 1H), 1.70 (s, 6H);

$^{19}\text{F}$  NMR (376 MHz,  $\text{CDCl}_3$ ):  $\delta$  -109.95 (s, 2F), -124.83 (s, 2F), -130.73 (s, 2F), -138.29 (d,  $J = 50.66$  Hz, 2F);

$^{13}\text{C}$  NMR (125 MHz,  $\text{CDCl}_3$ ):  $\delta$  150.5, 147.9, 121.7, 121.0, 119.5, 116.0, 108.1, 107.0, 25.9;

HRMS (EI,  $m/z$ ): Calcd. for  $\text{C}_{13}\text{H}_{10}\text{F}_8\text{O}_2$   $[\text{M}]^+$  350.0553; found: 350.0553

$^1\text{H}$  NMR (500 MHz,  $\text{CDCl}_3$ )

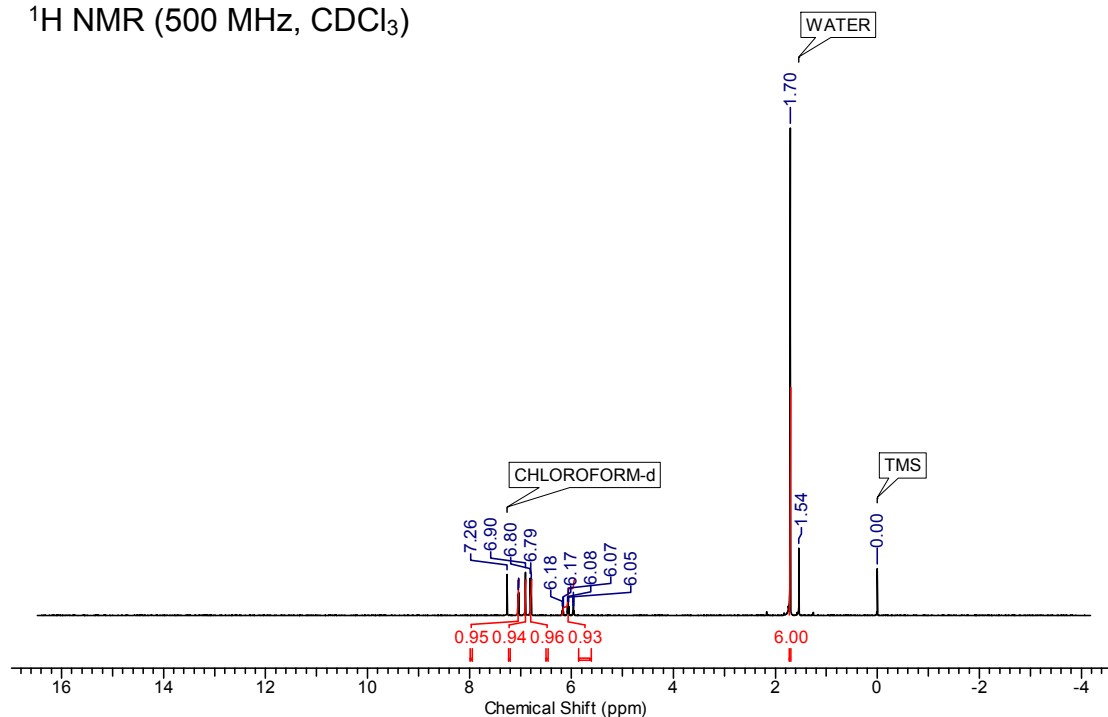

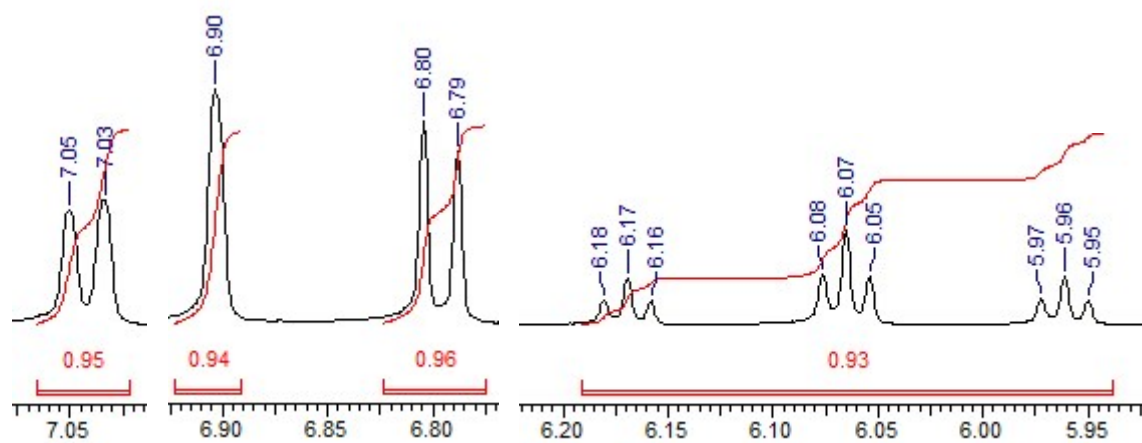

<sup>19</sup>F NMR (376 MHz, CDCl<sub>3</sub>)

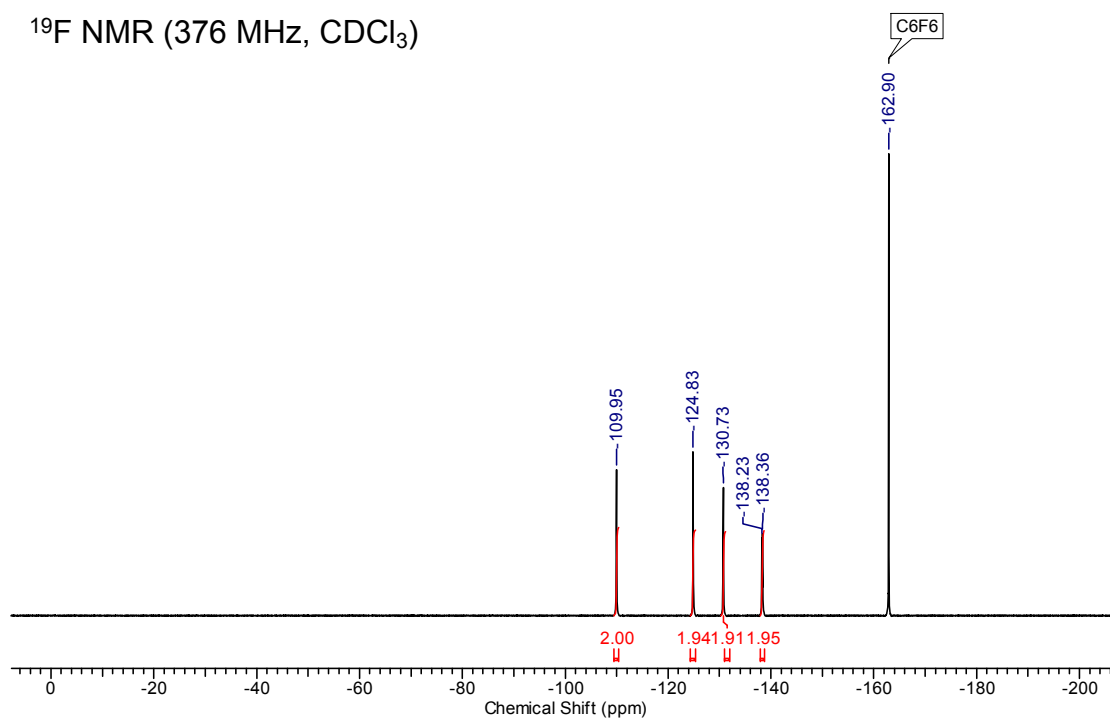

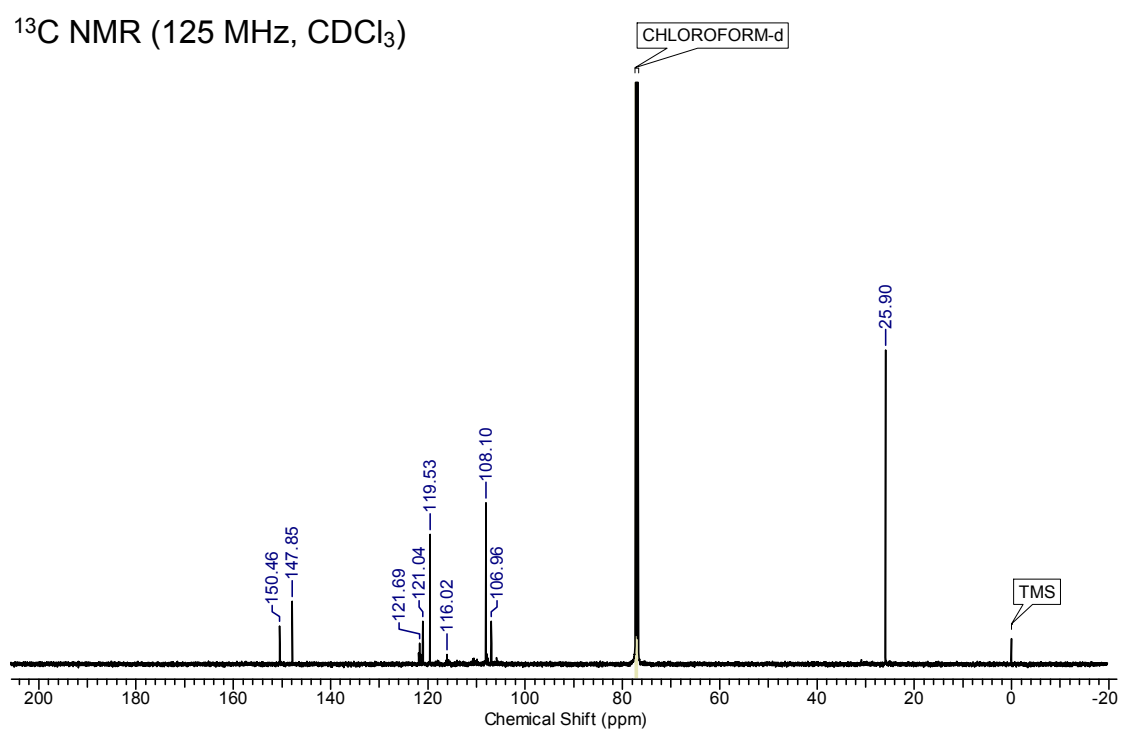

**methyl(5,5,6,6,7,7,8,8-octafluoro-4-methoxy-5,6,7,8-tetrahydronaphthalen-1-yl)sulfane (5a)**

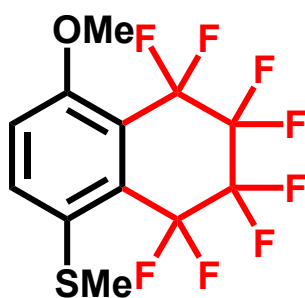

Compound **5a** was prepared according to the general procedure using octafluoro-1,4-diiodobutane, 1,4- $\text{C}_4\text{F}_8\text{I}_2$  (6 eq., 680.76 mg,  $5.0 \times 10^{-2}$  M) in 2% yield as an earth yellow solid.

$^1\text{H}$  NMR (500 MHz,  $\text{CDCl}_3$ ):  $\delta$  7.68 (d,  $J = 8.83$  Hz, 1H), 7.21 (d,  $J = 9.14$  Hz, 1H), 3.95 (s, 3H), 2.51 (s, 3H);

$^{19}\text{F}$  NMR (376 MHz,  $\text{CDCl}_3$ ):  $\delta$  -106.21 (s, 2F), -109.12 (s, 2F), -136.15 (s, 4F);

$^{13}\text{C}$  NMR (125 MHz,  $\text{CDCl}_3$ ):  $\delta$  157.5, 136.5, 131.1, 116.5, 56.9, 18.8;

HRMS (EI,  $m/z$ ): Calcd. for  $\text{C}_{12}\text{H}_8\text{F}_8\text{OS}$   $[\text{M}]^+$  352.0168; found: 352.0152.

$^1\text{H}$  NMR (500 MHz,  $\text{CDCl}_3$ )

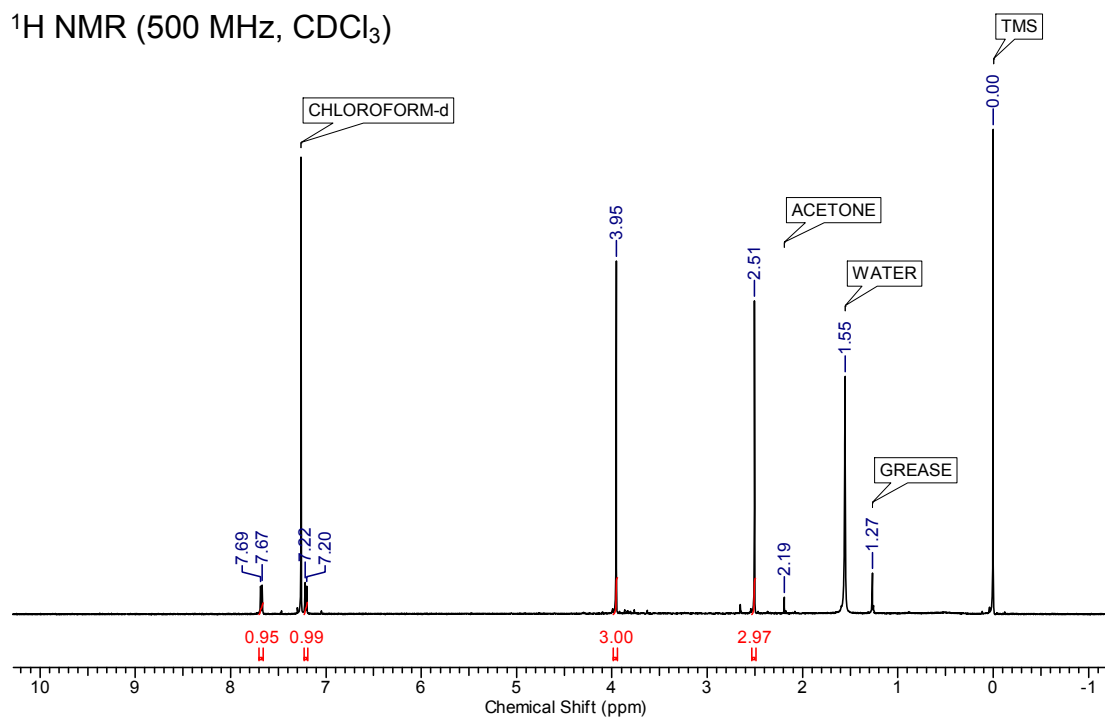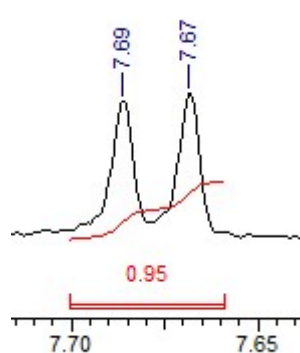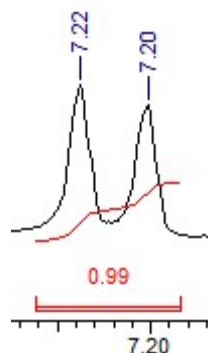

$^{19}\text{F}$  NMR (376 MHz,  $\text{CDCl}_3$ )

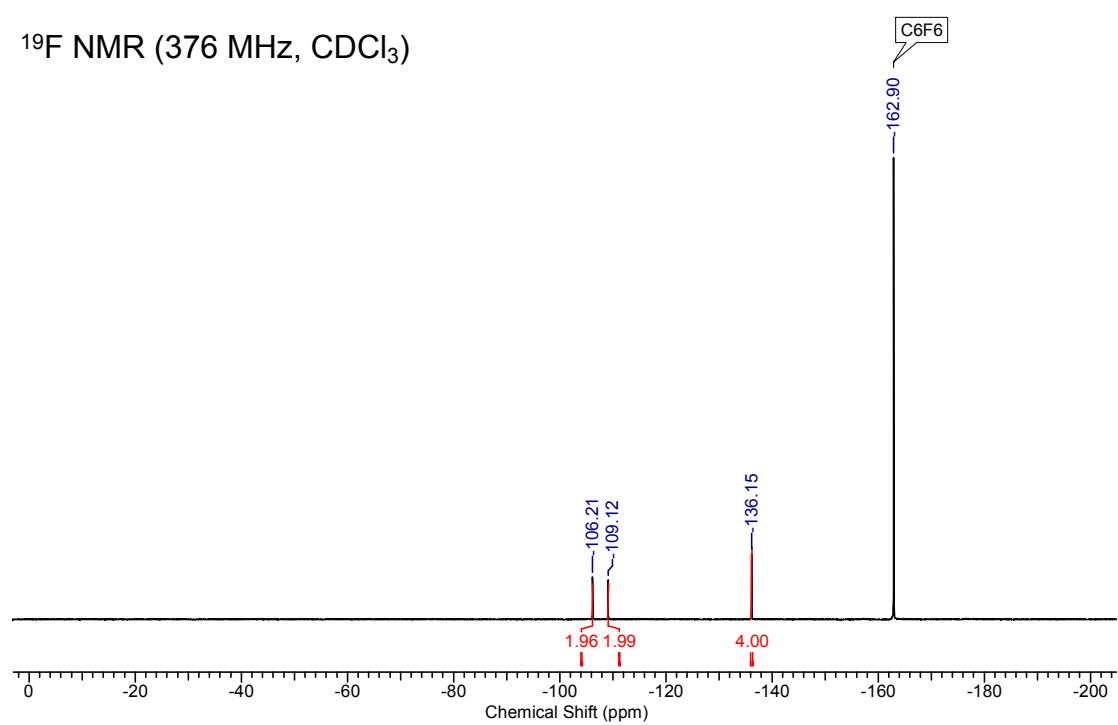

200225 C4F8-M1852 MW 352 13C NMR.003.001.1R.esp

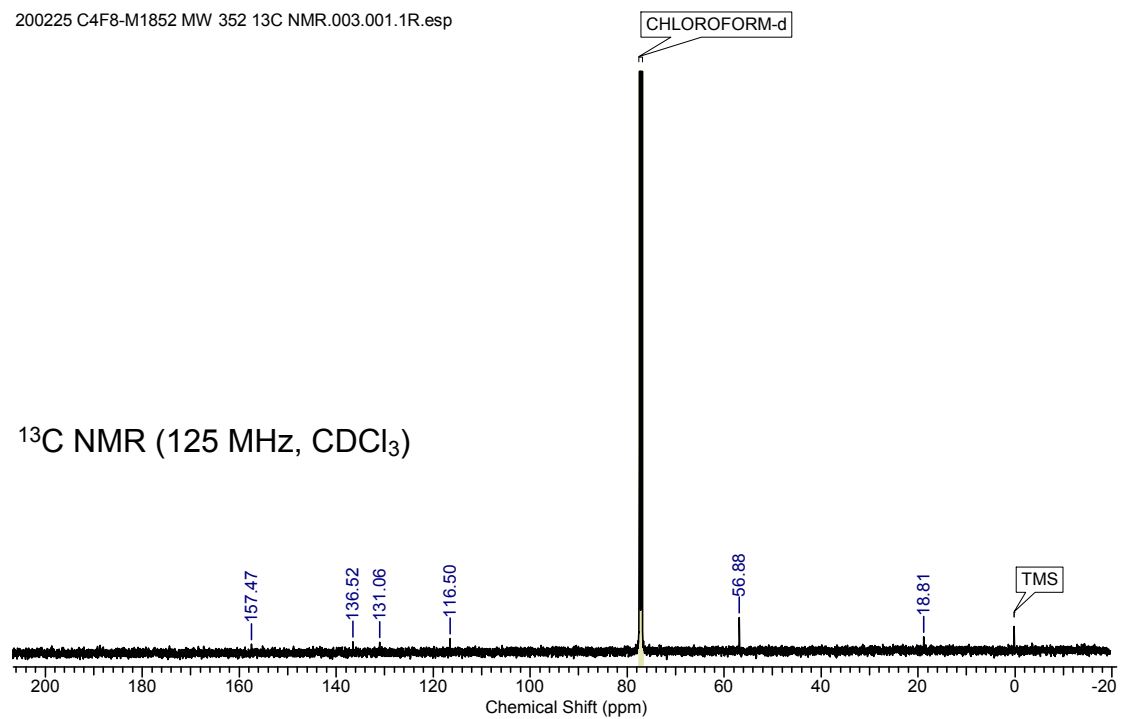



**(4-methoxy-3-(1,1,2,2,3,3,4,4-octafluorobutyl)phenyl)(methyl)sulfane (5b)**

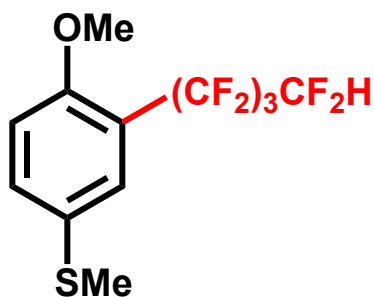

Compound **5b** was prepared according to the general procedure using octafluoro-1,4-diiodobutane, 1,4-C<sub>4</sub>F<sub>8</sub>I<sub>2</sub> (6 eq., 680.76 mg, 5.0 × 10<sup>-2</sup> M) in 11% yield as a yellow oil.

<sup>1</sup>H NMR (500 MHz, CDCl<sub>3</sub>): δ 7.47 (dd, *J* = 8.83 Hz; 2.21 Hz, 1H), 7.44 (d, *J* = 2.21 Hz, 1H), 6.97 (d, *J* = 8.83 Hz; 1H), 6.13 (tt, *J* = 52.33 Hz; 5.67 Hz, 1H), 3.85 (s, 3H), 2.47 (s, 3H);

<sup>19</sup>F NMR (376 MHz, CDCl<sub>3</sub>): δ -108.93 (s, 2F), -124.52 (s, 2F), -131.50 (s, 2F), -138.40 (d, *J* = 47.69 Hz, 2F);

<sup>13</sup>C NMR (125 MHz, CDCl<sub>3</sub>): δ 157.0, 133.9, 129.8, 129.5, 118.0, 113.6, 56.4, 17.9;

HRMS (EI, *m/z*): Calcd. for C<sub>12</sub>H<sub>10</sub>F<sub>8</sub>OS [M]<sup>+</sup> 354.0325; found: 354.0324.

<sup>1</sup>H NMR (500 MHz, CDCl<sub>3</sub>)

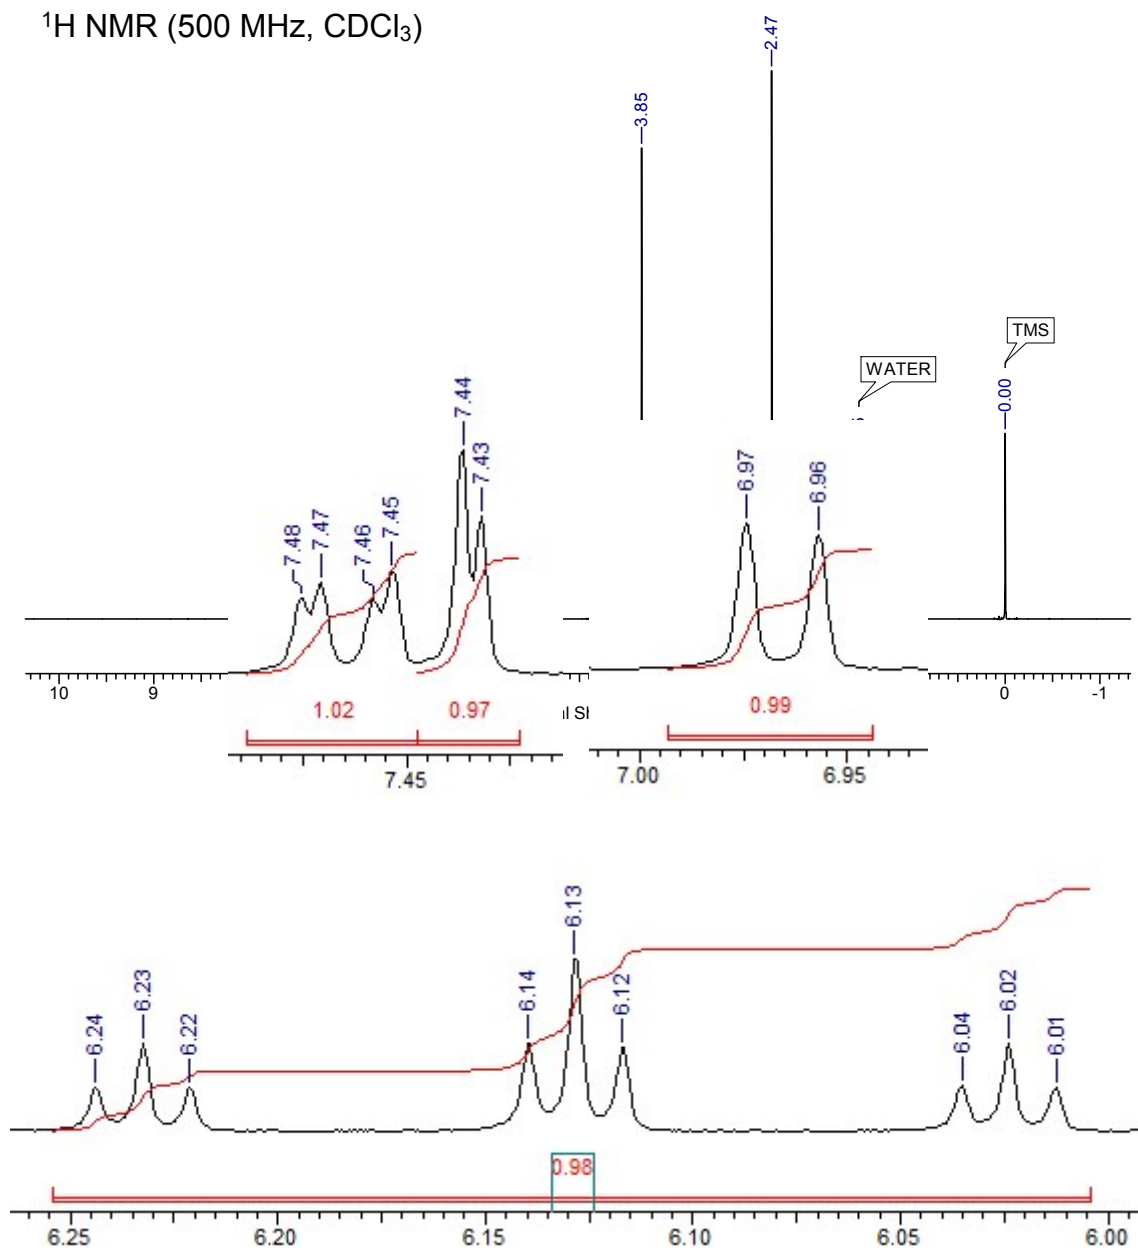

2-200302 C4F8-M1852 MW354-NO1 19F NMR-1-2.ESP

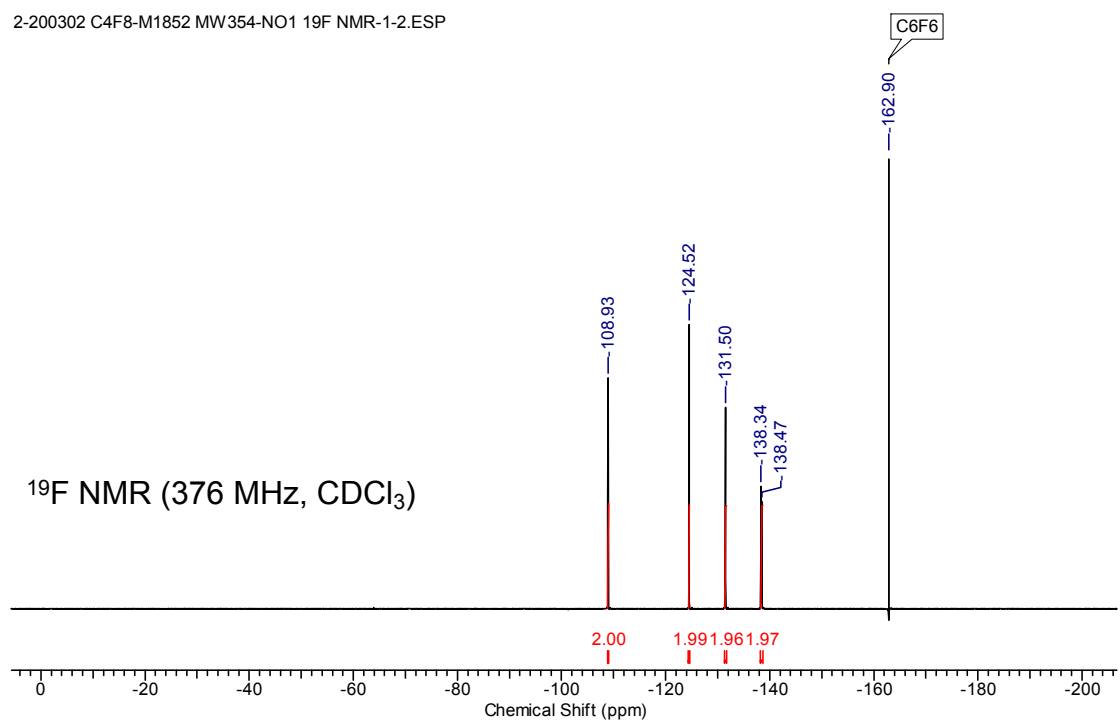

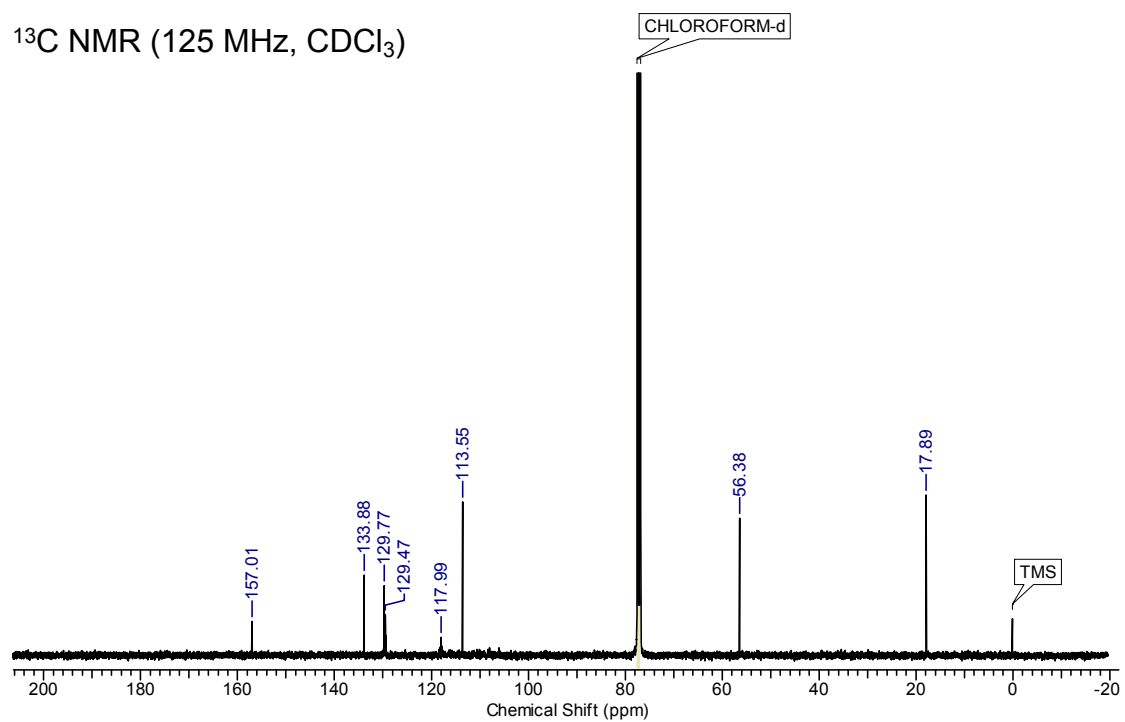

(4-methoxy-2-(1,1,2,2,3,3,4,4-octafluorobutyl)phenyl)(methyl)sulfane (5b\*)

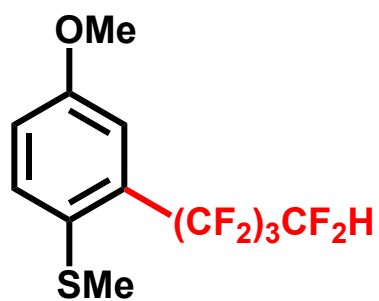

Compound **5b\*** was prepared according to the general procedure using octafluoro-1,4-diiodobutane, 1,4-C<sub>4</sub>F<sub>8</sub>I<sub>2</sub> (6 eq., 680.76 mg, 5.0 × 10<sup>-2</sup> M) in 5% yield as a yellow oil.

<sup>1</sup>H NMR (500 MHz, CDCl<sub>3</sub>): δ 7.41 (d, *J* = 8.51 Hz, 1H), 7.06-7.04 (m, 2H), 6.15 (tt, *J* = 52.33 Hz; 5.67 Hz, 1H), 3.83 (s, 3H), 2.45 (s, 3H);

<sup>19</sup>F NMR (376 MHz, CDCl<sub>3</sub>): δ -105.45 (s, 2F), -123.26 (s, 2F), -131.05 (s, 2F), -138.23 (d, *J* = 59.60 Hz, 2F);

<sup>13</sup>C NMR (125 MHz, CDCl<sub>3</sub>): δ 157.9, 132.6, 130.2, 118.2, 115.1, 55.8, 18.8

HRMS (EI, *m/z*): Calcd. for C<sub>12</sub>H<sub>10</sub>F<sub>8</sub>OS [M]<sup>+</sup> 354.0325; found: 354.0328.

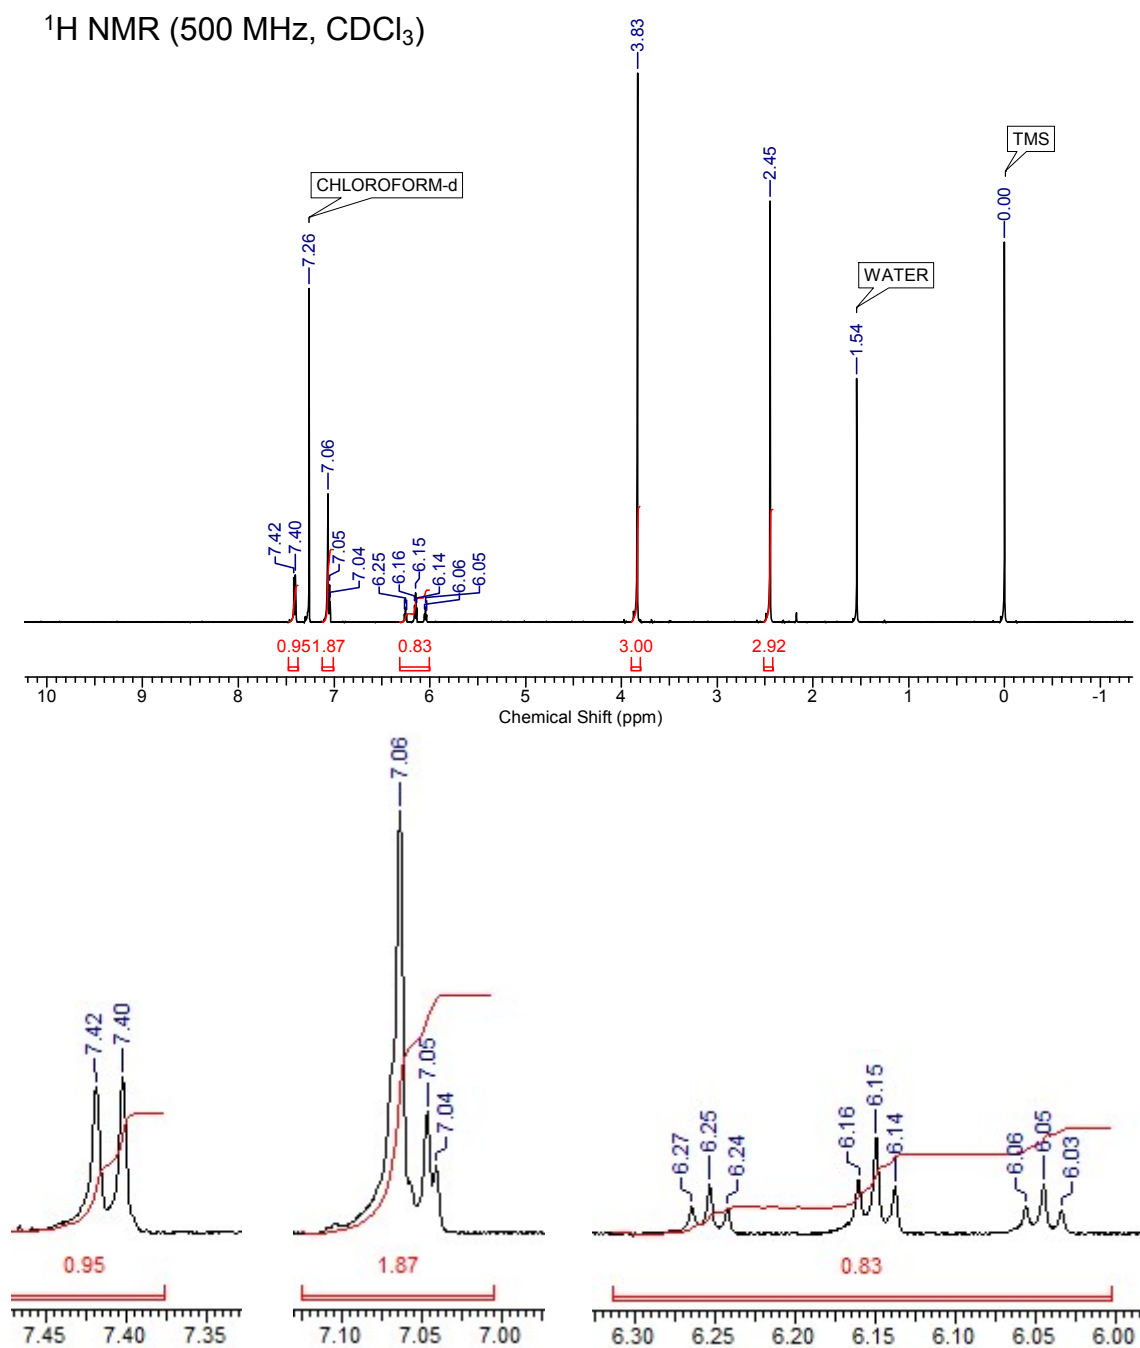

$^{19}\text{F}$  NMR (376 MHz,  $\text{CDCl}_3$ )

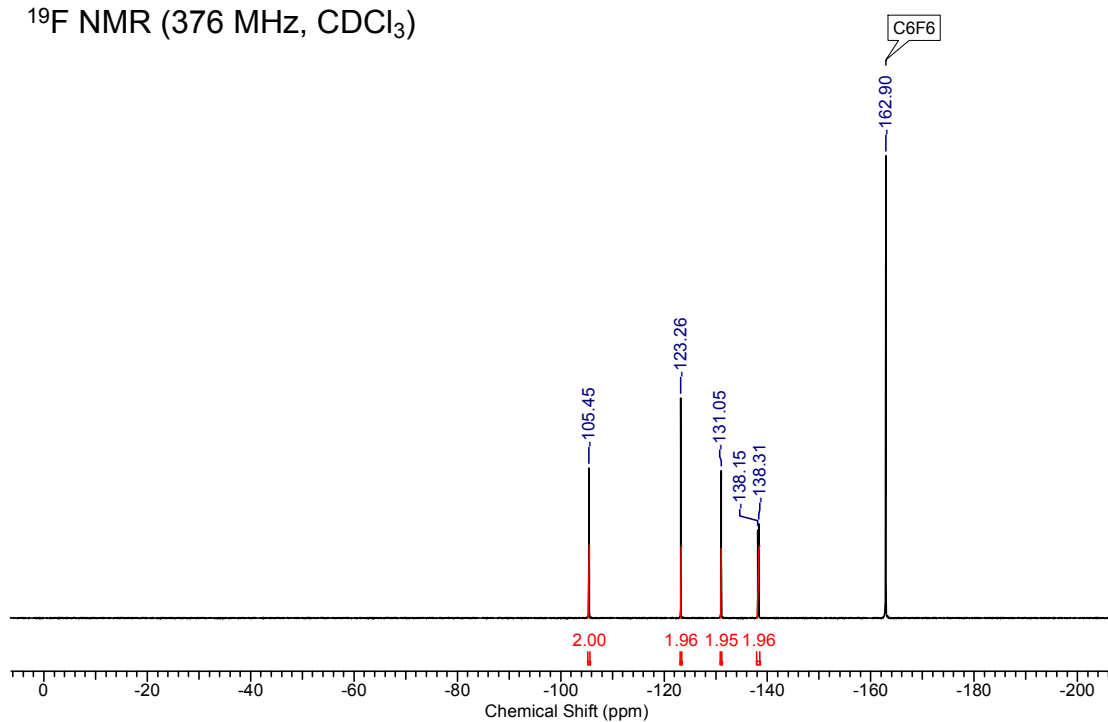

200223 C4F8-M1852 MW 354-2  $^{13}\text{C}$  NMR.003.001.1R.ESP

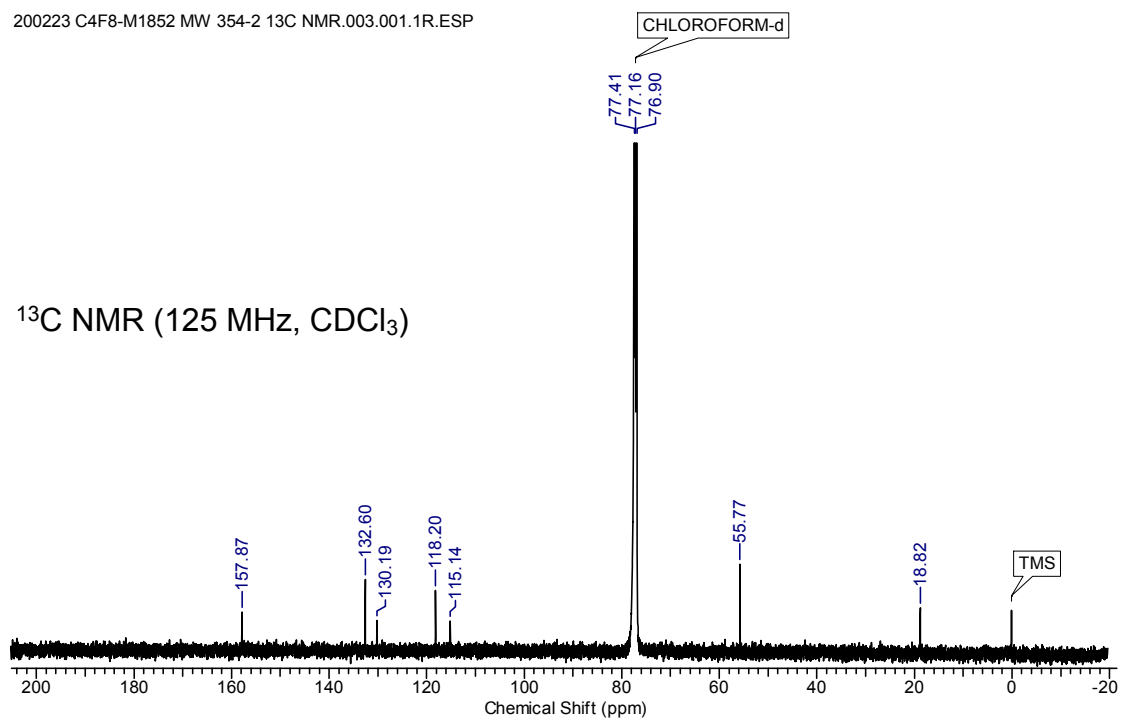

**4,4,5,5,6,6,7,7-octafluoro-1-phenyl-4,5,6,7-tetrahydro-1*H*-indole (6a)**

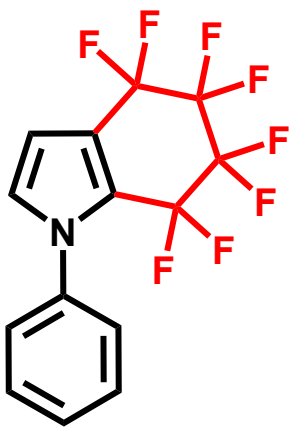

Compound **6a** was prepared according to the general procedure using octafluoro-1,4-diiodobutane, 1,4-C<sub>4</sub>F<sub>8</sub>I<sub>2</sub> (6 eq., 680.76 mg, 5.0 × 10<sup>-2</sup> M) in 32% yield as a colorless oil.

$^1\text{H}$  NMR (500 MHz,  $\text{CDCl}_3$ ):  $\delta$  7.52-7.48 (m, 3H), 7.45-7.43 (m, 2H), 7.09-7.08 (m, 1H), 6.64 (d,  $J = 2.52$  Hz, 1H);

$^{19}\text{F}$  NMR (376 MHz,  $\text{CDCl}_3$ ):  $\delta$  -102.53 (s, 2F), -103.20 (s, 2F), -133.14 (s, 2F), -133.75 (s, 2F);

$^{13}\text{C}$  NMR (125 MHz,  $\text{CDCl}_3$ ):  $\delta$  137.9, 130.3, 129.7, 129.6, 126.3, 120.6, 118.2, 110.5, 109.5, 106.4;

HRMS (EI,  $m/z$ ): Calcd. for  $\text{C}_{14}\text{H}_7\text{F}_8\text{N}$   $[\text{M}]^+$  341.0451; found: 341.0454.

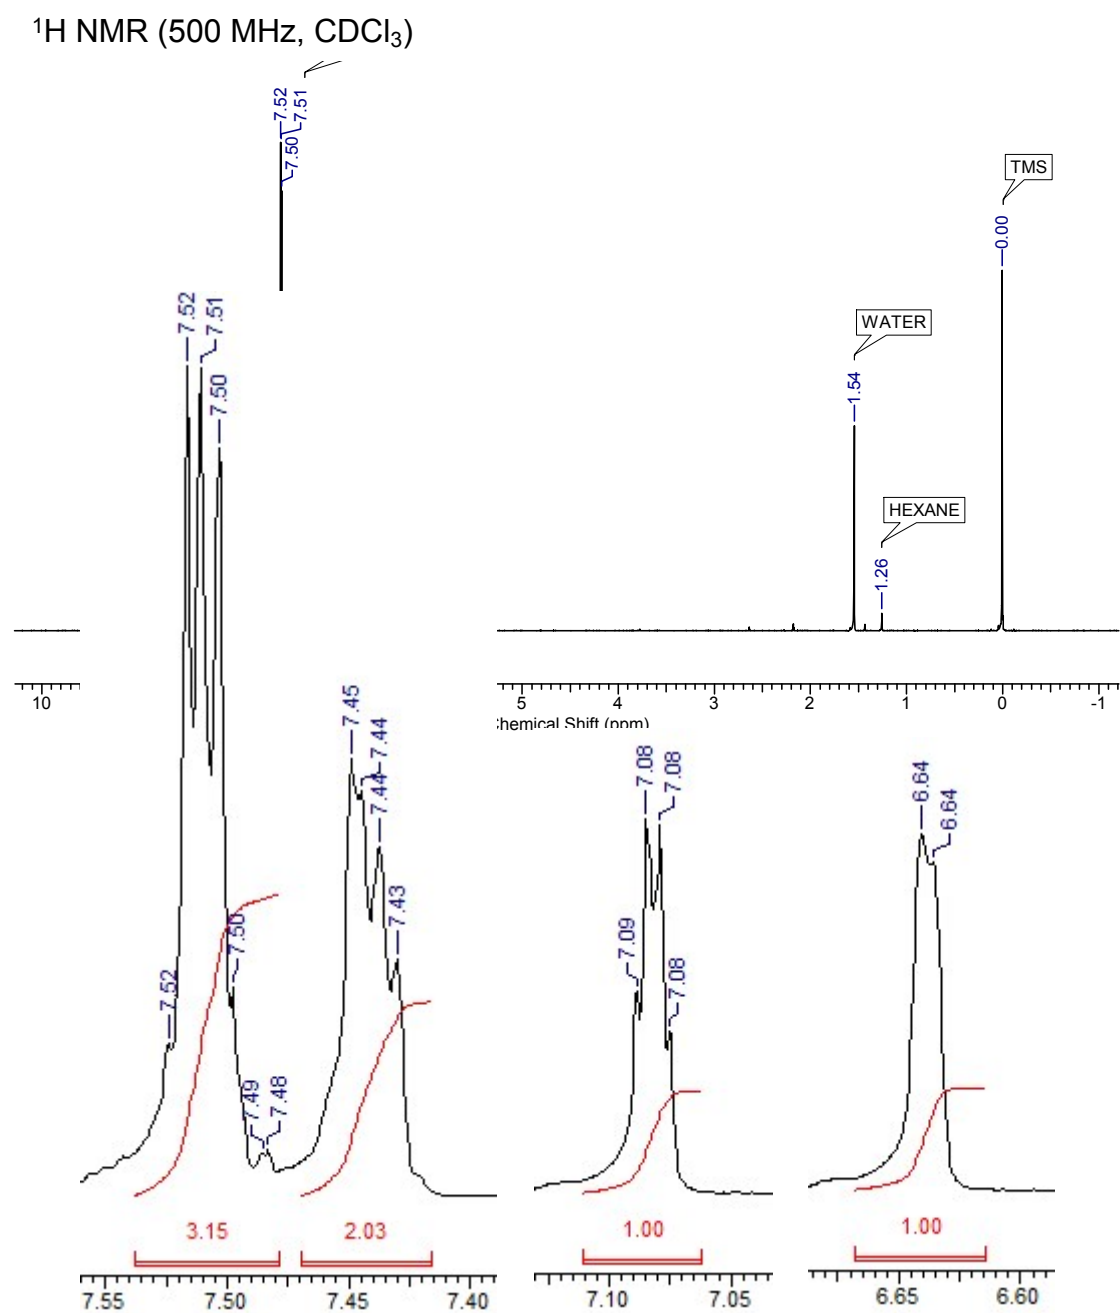



200217-2 C4F8-P1122 MW341 19F NMR-1-2.ESP

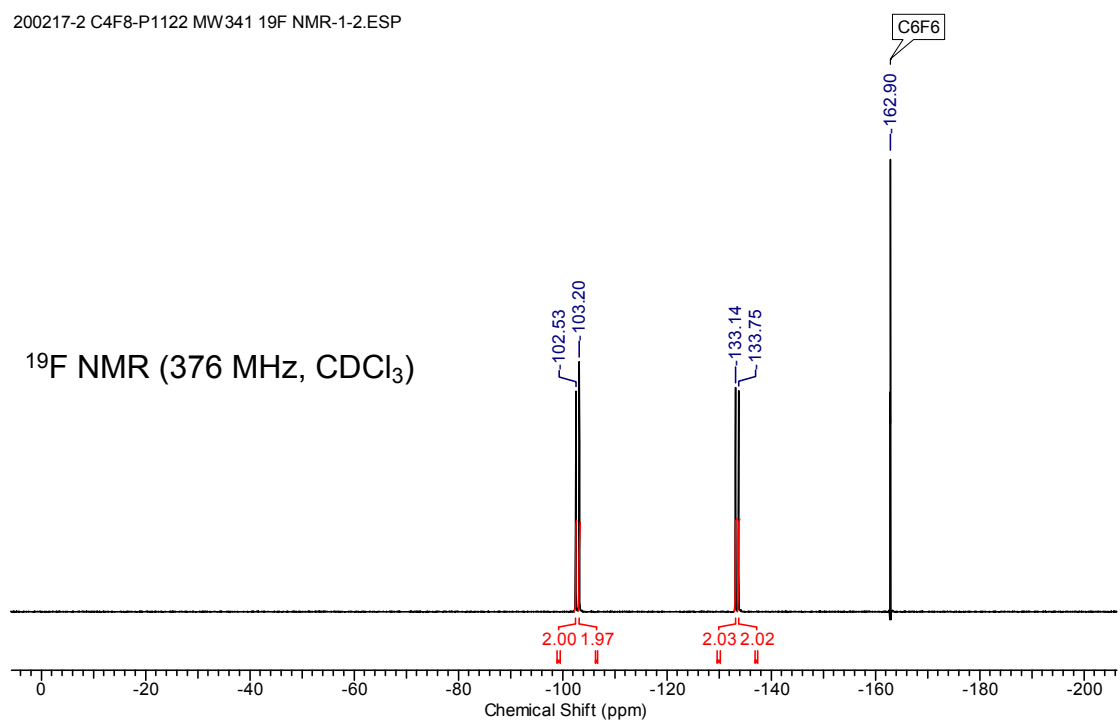

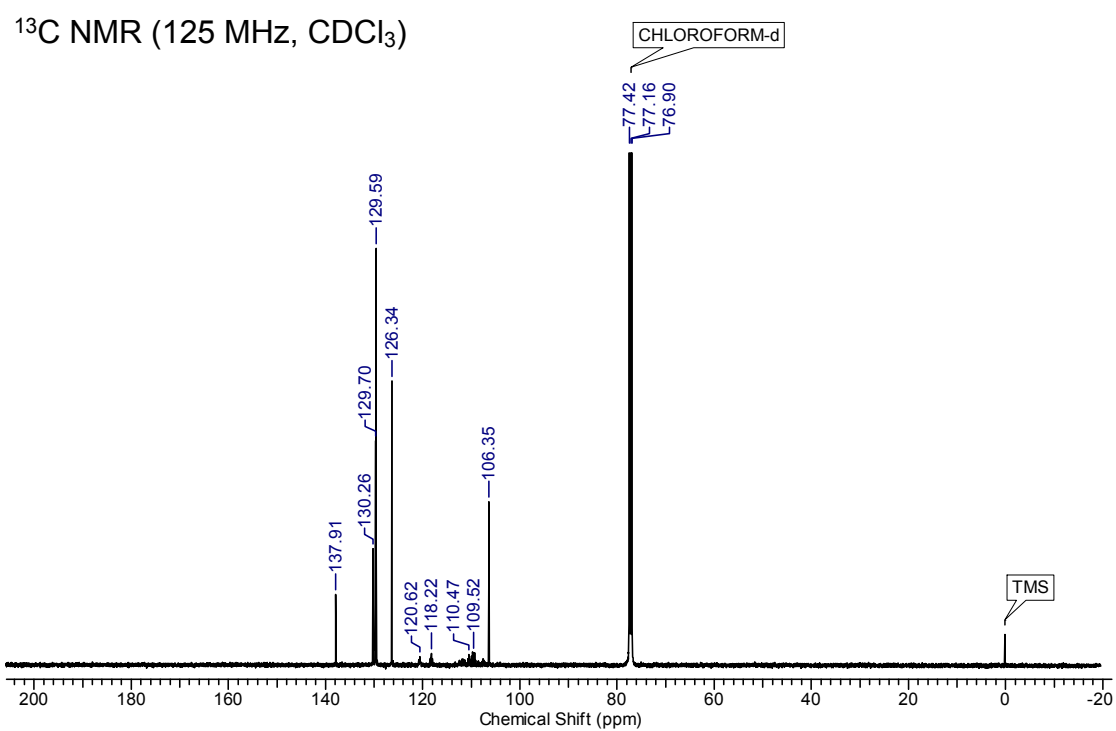

## 2-(1,1,2,2,3,3,4,4-octafluorobutyl)-1-phenyl-1H-pyrrole (**6b**)

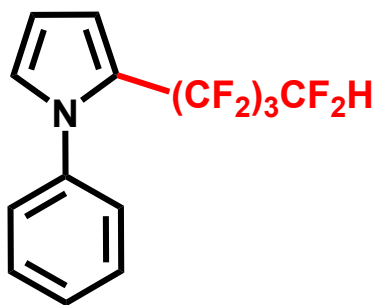

Compound **6b** was prepared according to the general procedure using octafluoro-1,4-diiodobutane,  $1,4\text{-C}_4\text{F}_8\text{I}_2$  (6 eq., 680.76 mg,  $5.0 \times 10^{-2}$  M) in 19% yield as a colorless oil.

$^1\text{H}$  NMR (500 MHz,  $\text{CDCl}_3$ ):  $\delta$  7.45-7.40 (m, 3H), 7.36-7.34 (m, 2H), 6.89-6.88 (m, 1H), 6.75 (m, 1H), 6.33 (t,  $J = 3.78$  Hz, 1H), 5.92 (tt,  $J = 52.02$  Hz; 5.67 Hz, 1H);

$^{19}\text{F}$  NMR (282 MHz,  $\text{CDCl}_3$ ):  $\delta$  (-101.47)-(-101.55) (m, 2F), (-123.45)-(-123.60) (m, 2F), (-131.01)-(-131.15) (m, 2F), (-138.18)-(-138.31) (m, 1F), (-138.37)-(-138.50) (m, 1F);

$^{13}\text{C}$  NMR (125 MHz,  $\text{CDCl}_3$ ):  $\delta$  139.9, 129.2, 128.8, 127.5, 120.3, 115.2, 114.1, 112.1, 110.9, 109.9, 108.9, 107.9, 105.9;

GC-MS ( $m/z$ ): Calcd. for  $\text{C}_{14}\text{H}_9\text{F}_8\text{N}$   $[\text{M}]^+$  343; found: 343.

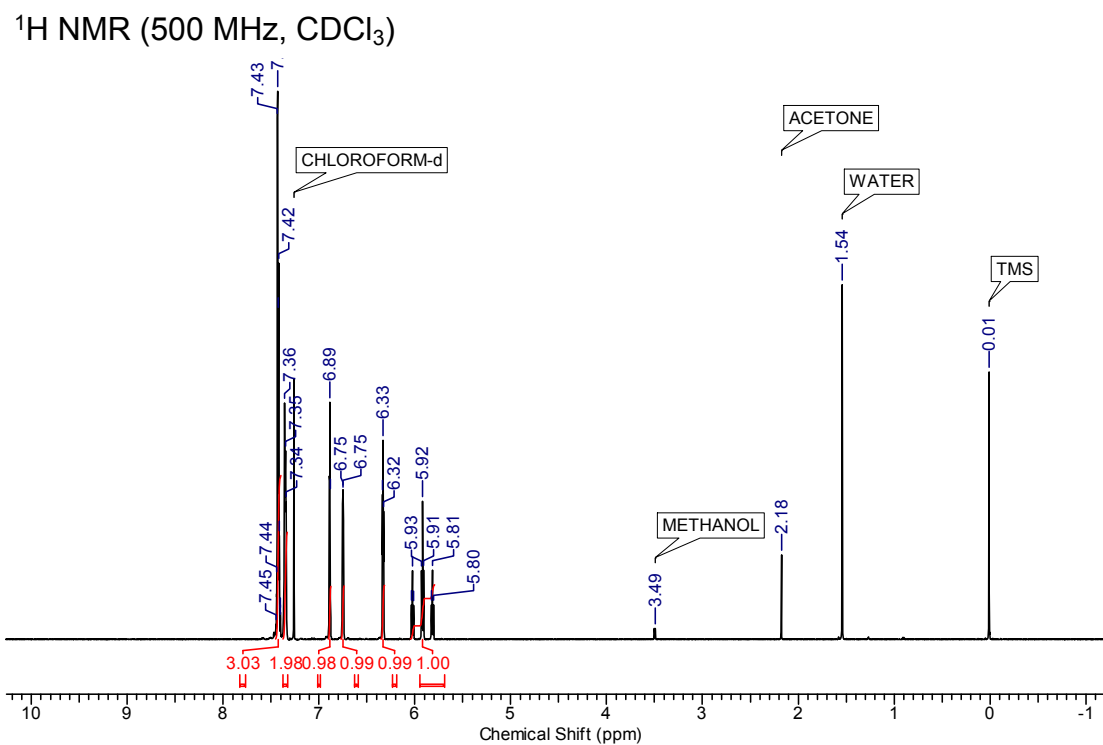

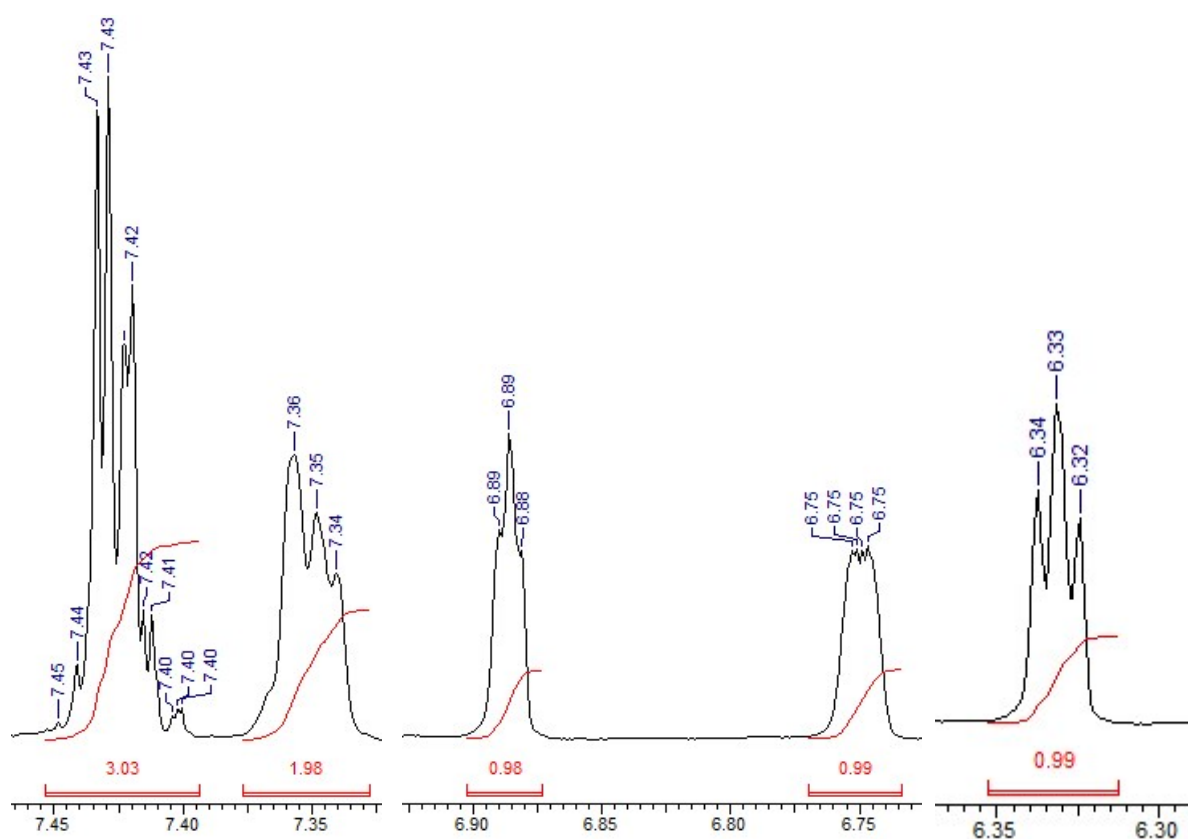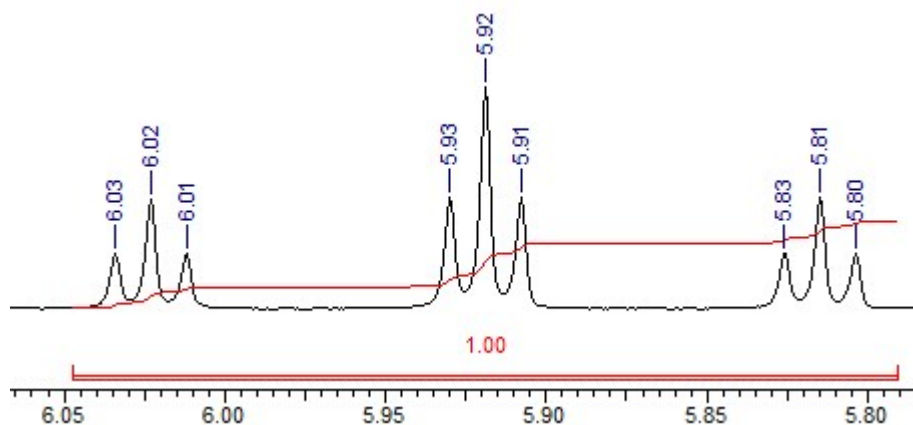

$^{19}\text{F}$  NMR (282 MHz,  $\text{CDCl}_3$ )

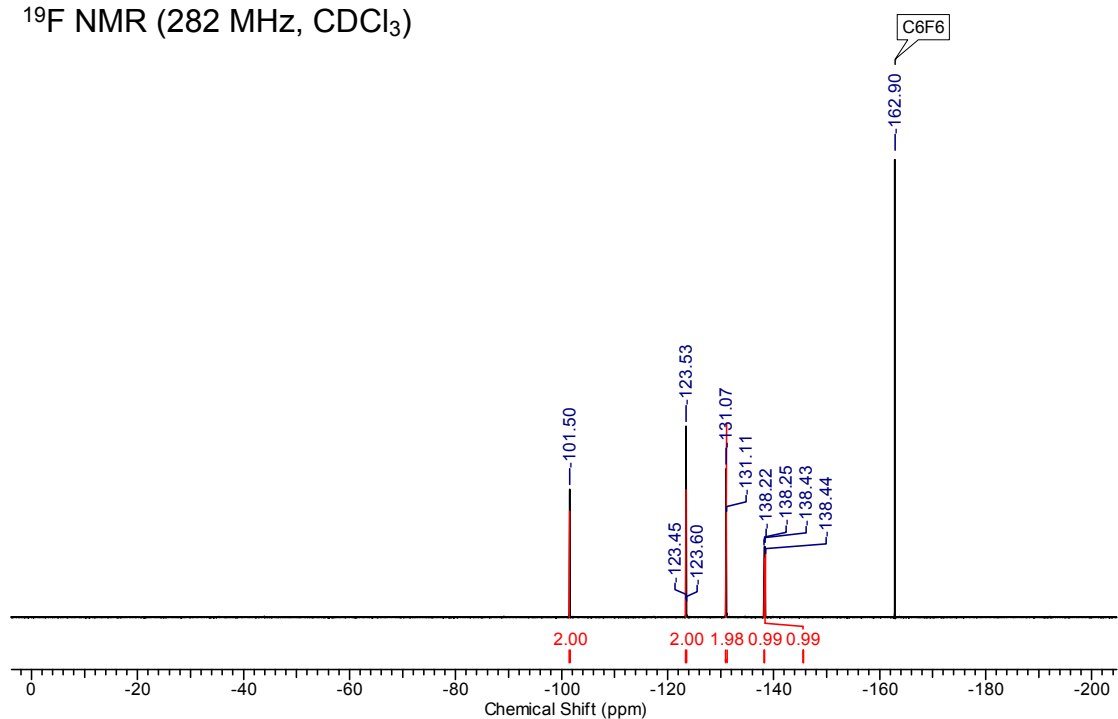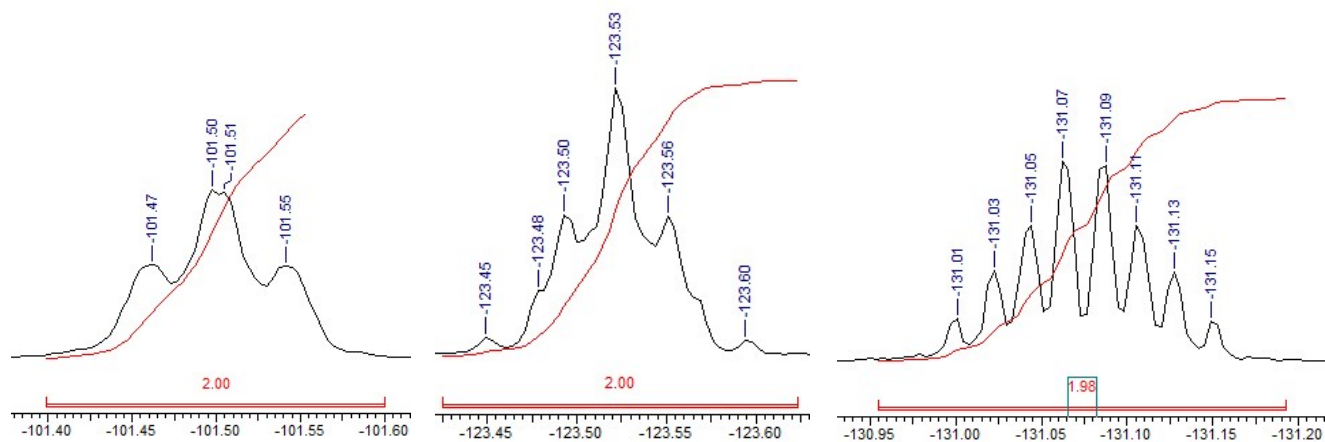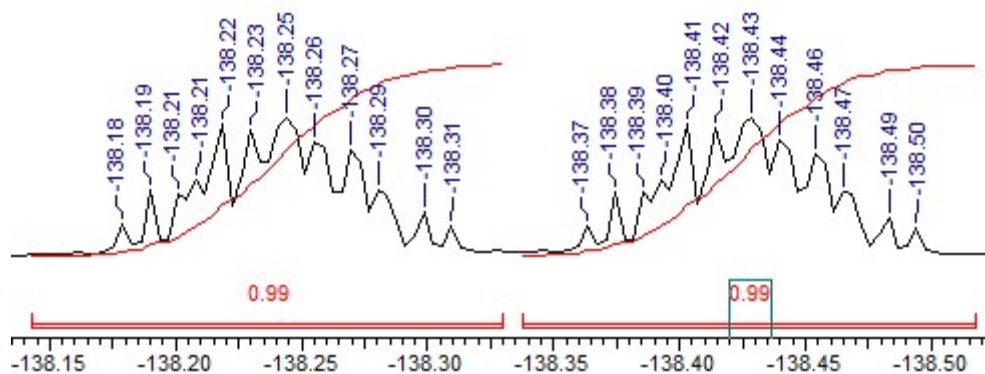

$^{13}\text{C}$  NMR (125 MHz,  $\text{CDCl}_3$ )

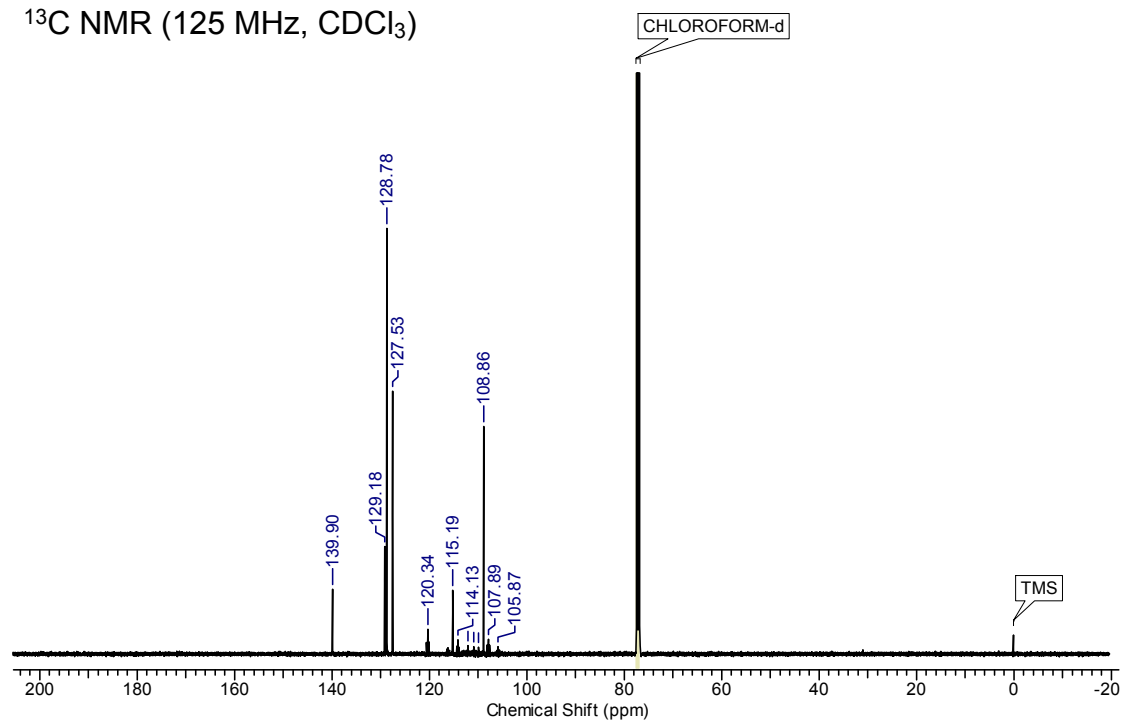

## 1,1,2,2,3,3,4,4-octafluoro-9-methyl-2,3,4,9-tetrahydro-1*H*-carbazole (7a)

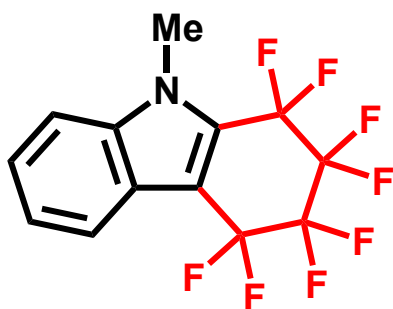

Compound **7a** was prepared according to the general procedure using octafluoro-1,4-diiodobutane, 1,4-C<sub>4</sub>F<sub>8</sub>I<sub>2</sub> (6 eq., 680.76 mg, 5.0 × 10<sup>-2</sup> M) in 4% yield as a white solid.

<sup>1</sup>H NMR (500 MHz, CDCl<sub>3</sub>): δ 7.91 (d, *J* = 8.20 Hz, 1H), 7.53-7.47 (m, 2H), 7.37-7.34 (m, 1H), 3.98 (s, 3H);

<sup>19</sup>F NMR (376 MHz, CDCl<sub>3</sub>): δ -104.15 (s, 2F), -106.11 (s, 2F), -132.70 (s, 2F), -133.68 (s, 2F);

<sup>13</sup>C NMR (125 MHz, CDCl<sub>3</sub>): δ 139.3, 126.8, 123.1, 122.2, 121.6, 110.7, 31.6;

HRMS (EI, *m/z*): Calcd. for C<sub>13</sub>H<sub>7</sub>F<sub>8</sub>N [M]<sup>+</sup> 329.0451; found: 329.0448.

<sup>1</sup>H NMR (500 MHz, CDCl<sub>3</sub>)

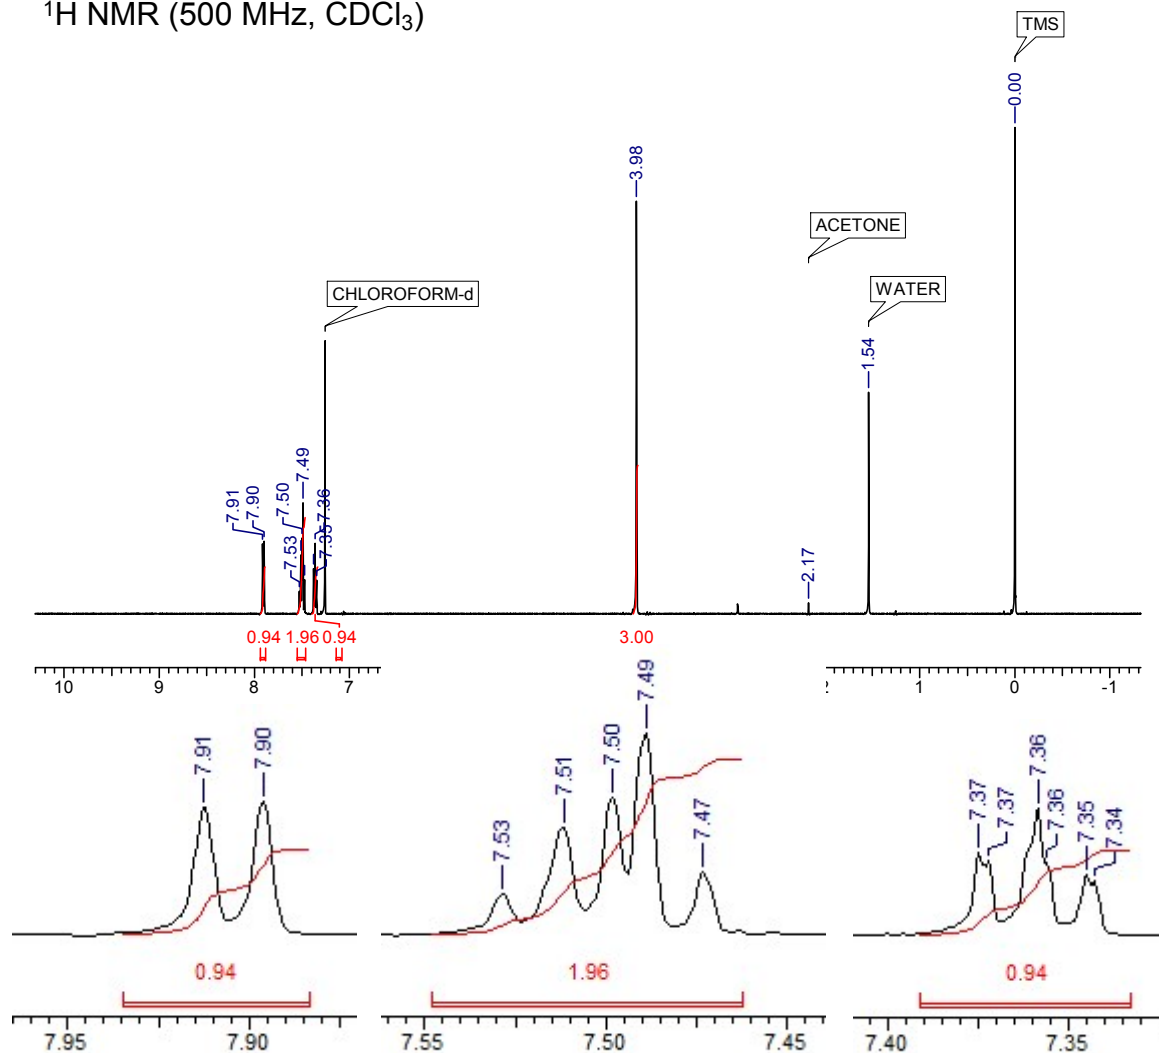

$^{19}\text{F}$  NMR (376 MHz,  $\text{CDCl}_3$ )

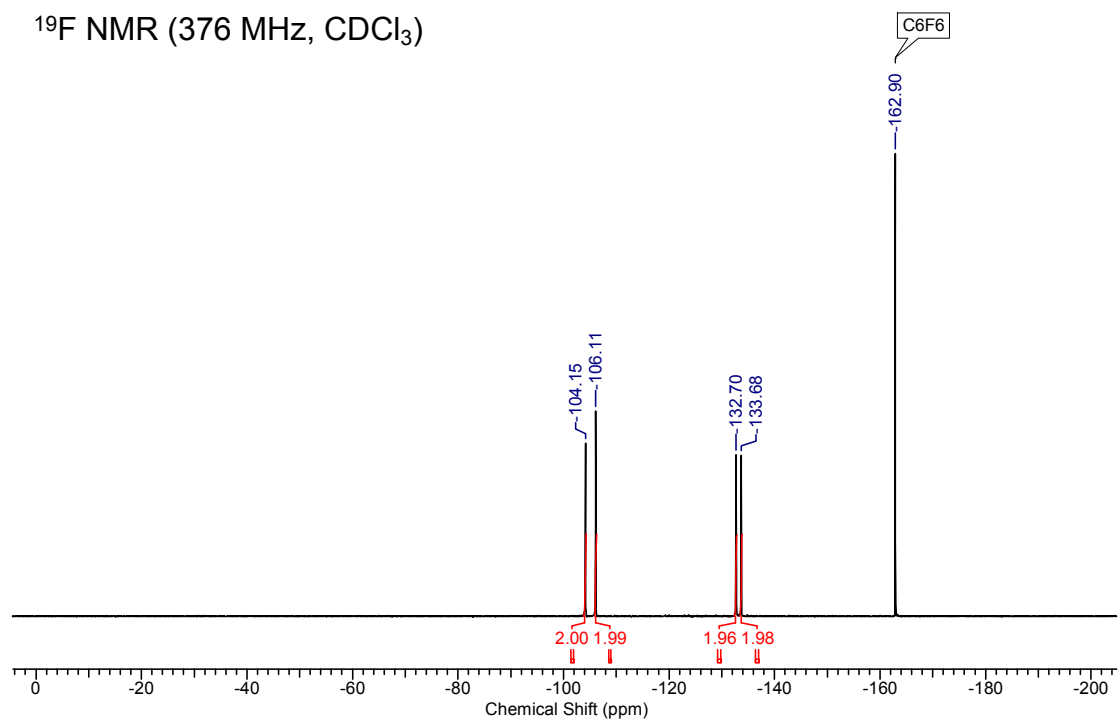



$^{13}\text{C}$  NMR (125 MHz,  $\text{CDCl}_3$ )

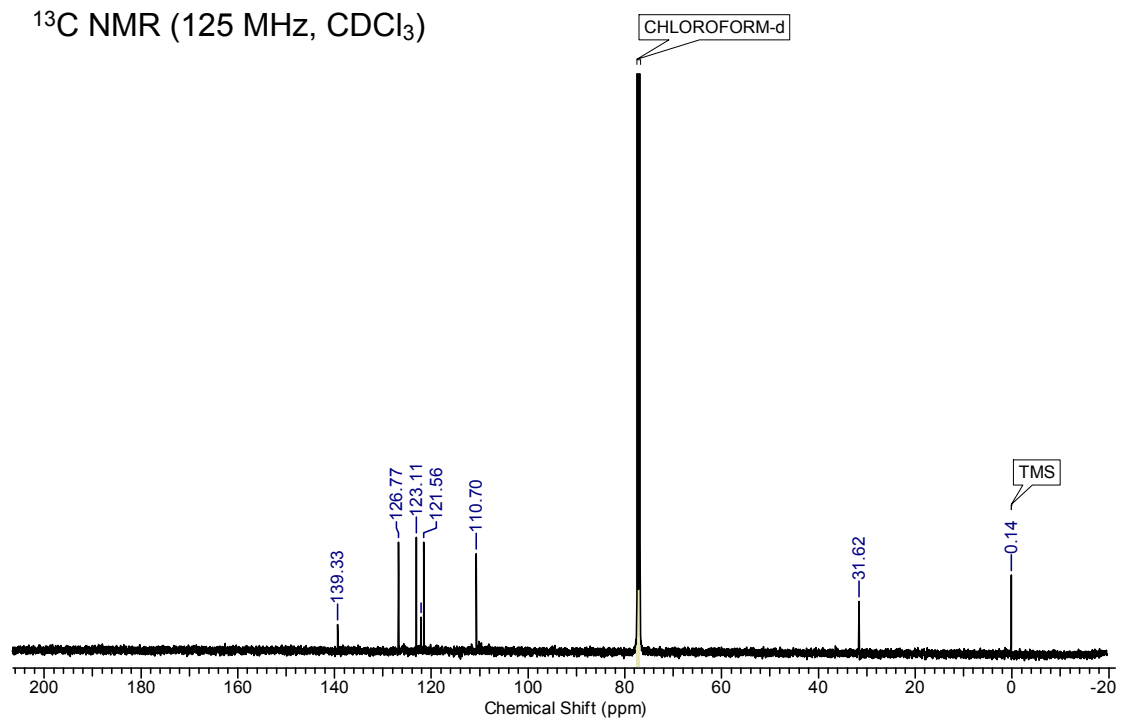

## 1-methyl-2,3-bis(1,1,2,2,3,3,4,4-octafluorobutyl)-1*H*-indole (**7b**)

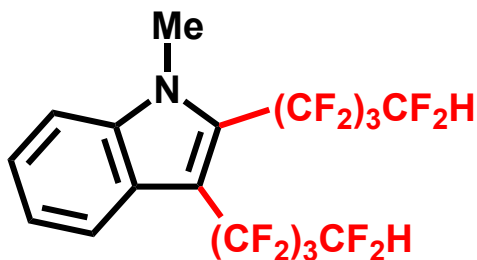

Compound **7b** was prepared according to the general procedure using octafluoro-1,4-diiodobutane, 1,4-C<sub>4</sub>F<sub>8</sub>I<sub>2</sub> (6 eq., 680.76 mg, 5.0 × 10<sup>-2</sup> M) in 2% yield as a colorless oil.

<sup>1</sup>H NMR (500 MHz, CDCl<sub>3</sub>): δ 7.30-7.27 (m, 2H), 6.87 (t, *J* = 7.25 Hz, 1H), 6.65 (d, *J* = 8.20 Hz, 1H), 4.13-3.98 (m, 2H), 2.95 (s, 3H);

<sup>19</sup>F NMR (282 MHz, CDCl<sub>3</sub>): δ (−109.30)–(−109.46) (m, 1F), (−110.30)–(−110.46) (m, 1F), (−111.43)–(−111.47) (m, 1F), (−112.41)–(−112.43) (m, 1F), (−119.32)–(−119.50) (m, 1F), (−120.30)–(−120.47) (m, 1F), (−122.44)–(−122.58) (m, 1F), (−123.44)–(−123.58) (m, 1F), (−132.74)–(−132.93) (m, 1F), (−133.72)–(−133.91) (m, 1F), (−134.16)–(−134.34) (m, 4F), (−135.71)–(−135.81) (m, 1F), (−136.69)–(−136.87) (m, 1F);

<sup>13</sup>C NMR (125 MHz, CDCl<sub>3</sub>): δ 152.9, 130.5, 125.3, 120.3, 120.2, 108.9, (67.5-67.1) (m), (45.9-45.5) (m), 35.9;

GC-MS (*m/z*): Cald. for C<sub>17</sub>H<sub>9</sub>F<sub>16</sub>N [M]<sup>+</sup> 531; found: [M–C<sub>4</sub>F<sub>8</sub>H]<sup>+</sup> 331.

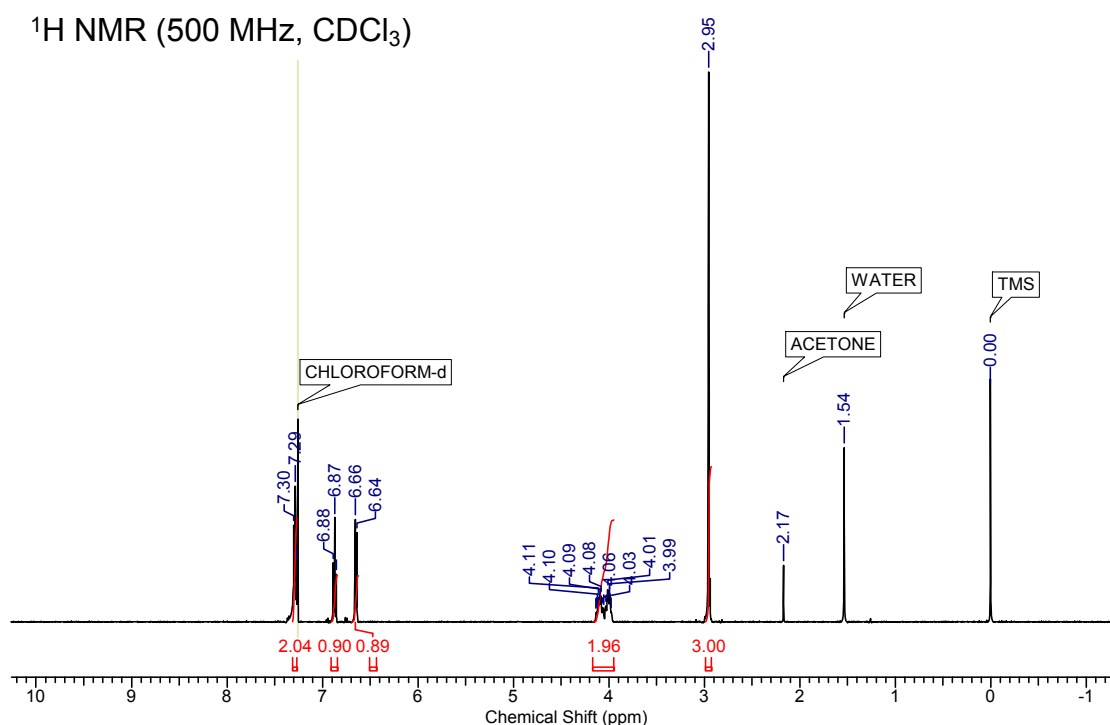

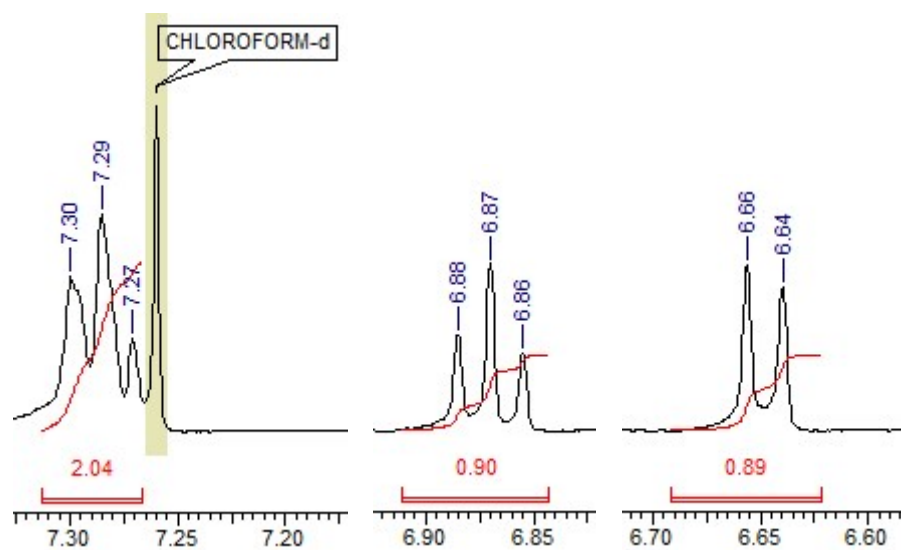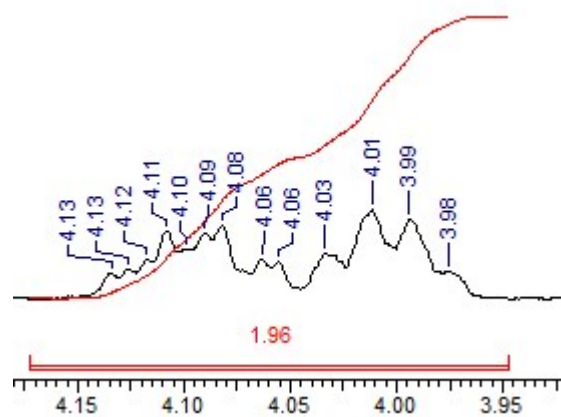

$^{19}\text{F}$  NMR (282 MHz,  $\text{CDCl}_3$ )

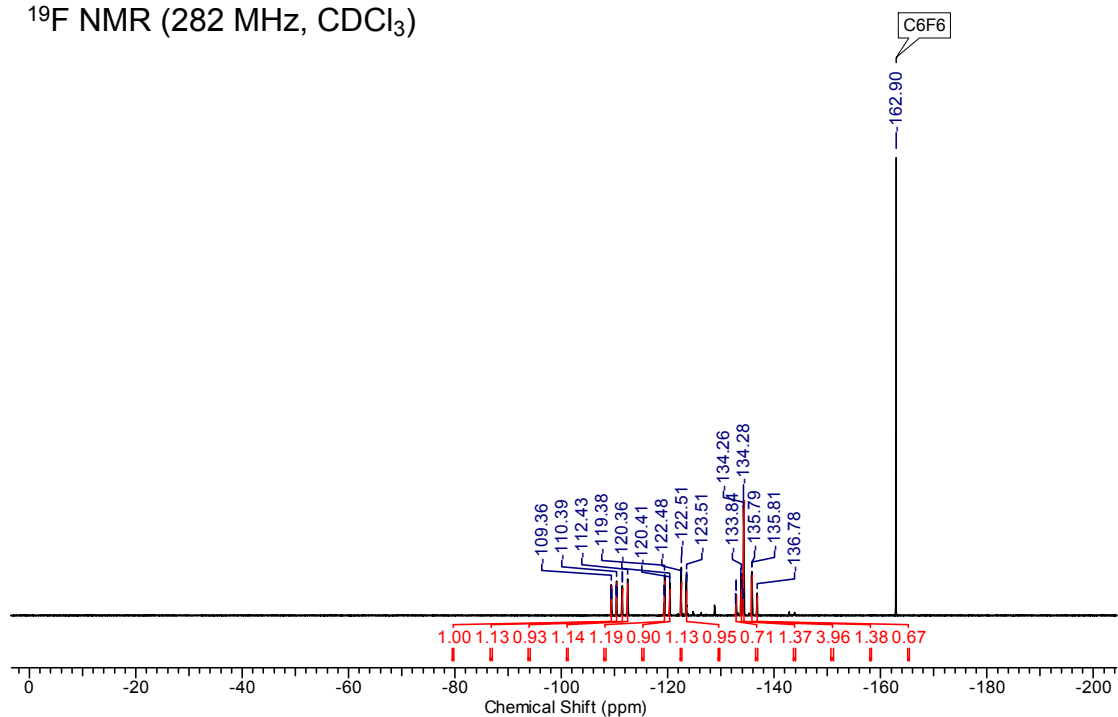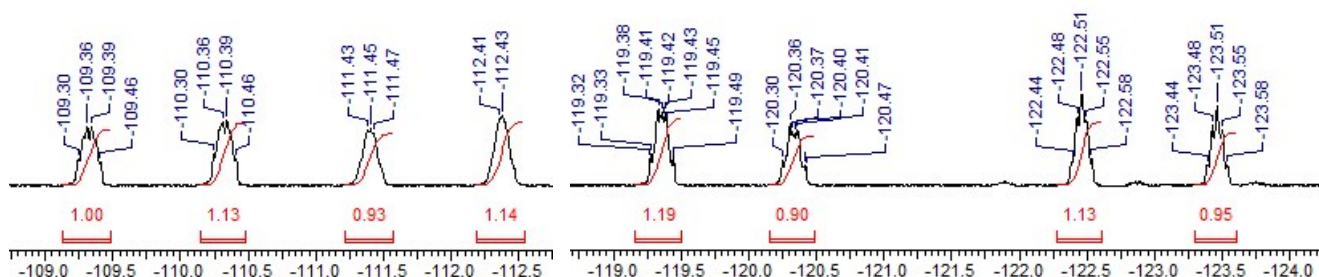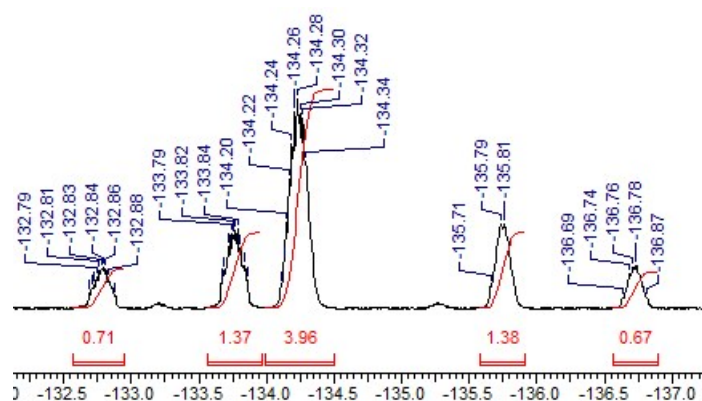

$^{13}\text{C}$  NMR (125 MHz,  $\text{CDCl}_3$ )

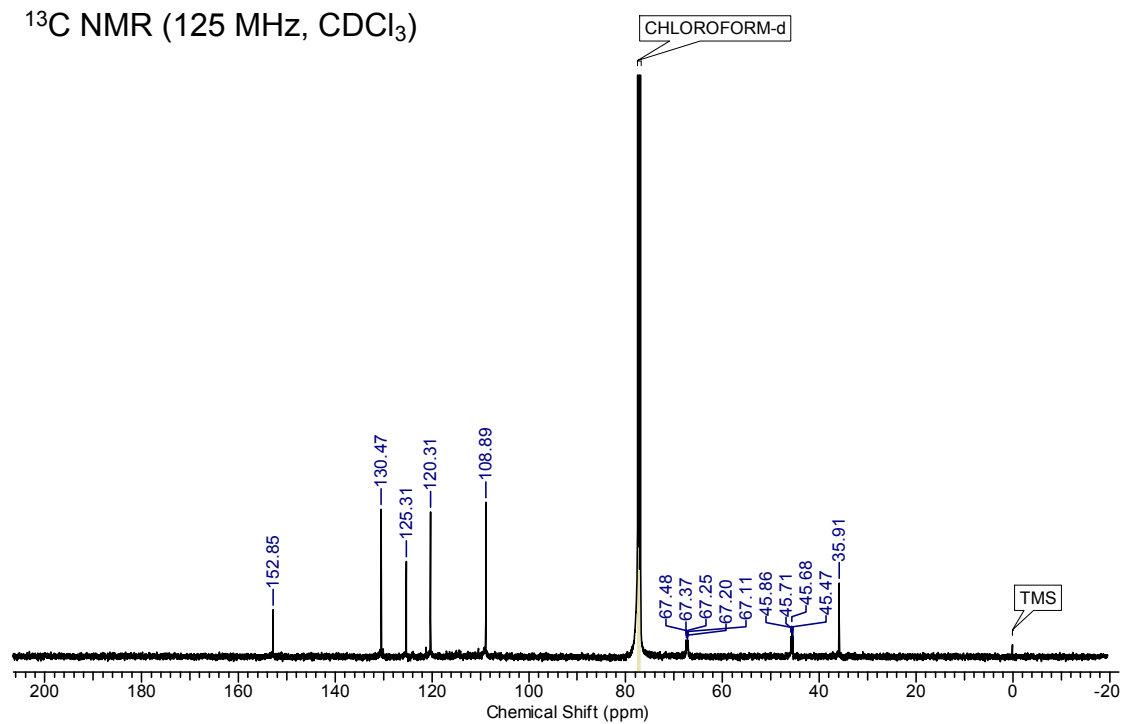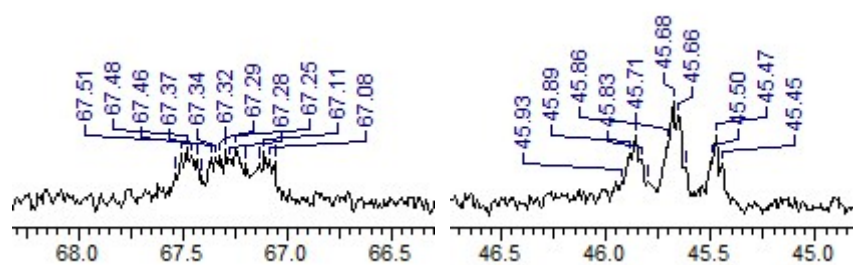

## References

- 1 Y. Murakami, Y. Hisaeda and A. Kajihara, *Bull. Chem. Soc. Jpn.*, 1983, **56**, 3642.
- 2 *Rigaku Oxford Diffraction, CrysAlis(Pro)*, Rigaku Corporation, Tokyo, Japan, 2015.
- 3 G. M. Sheldrick, *Acta Crystallogr., Sect. A: Found. Adv.*, 2015, **71**, 3.
- 4 G. M. Sheldrick, *Acta Crystallogr., Sect. C: Struct. Chem.*, 2015, **71**, 3.
- 5 O. V. Dolomanov, L. J. Bourhis, R. J. Gildea, J. A. K. Howard and H. Puschmann, *J. Appl. Crystallogr.*, 2009, **42**, 339.
- 6 M. J. Hossain, T. Ono, K. Wakiya and Y. Hisaeda, *Chem. Commun.*, 2017, **53**, 10878.
- 7 Y. Murakami, Y. Hisaeda, S.-D. Fan and Y. Matsuda, *Bull. Chem. Soc. Jpn.*, 1989, **62**, 2219.
- 8 L. He, K. Natte, J. Rabeah, C. Taeschler, H. Neumann, A. Brückner and M. Beller, *Angew. Chem. Int. Ed.*, 2015, **54**, 4320.
